# Supplementary material
Source: publisher figshare collection journal article supplement (https://tandf.figshare.com/articles/dataset/_/12429401)
Supplement: Supplementary file 1 [file 1]

Archive with 4 entries (4 files):
- ianb_a_1773480_sm4136.xls
- ianb_a_1773480_sm4135.pdf
- ianb_a_1773480_sm4134.pdf
- ianb_a_1773480_sm4133.pdf
