# Supplementary material
Source: publisher figshare collection journal article supplement (https://tandf.figshare.com/articles/dataset/_/12429401)
Supplement: Supplementary file 1 [file 1 › ianb_a_1773480_sm4136.xls]

## Sheet: Table S1
Table S1. Up-regulated genes between high-risk and low-risk patients.
Gene_ID	baseMean	log2FoldChange	lfcSE	stat	Pvalue	Padj
A2MP1	1.94442	1.9105	0.416302	4.5892	4.44941e-06	0.00015202
ABCA13	3.51355	1.55256	0.456994	3.39732	0.000680496	0.00756652
ABCC12	45.2198	1.68443	0.453686	3.71276	0.000205013	0.00310118
ABCC2	187.199	2.28252	0.446793	5.10868	3.24411e-07	1.8285e-05
ABCD2	12.2508	1.41826	0.431139	3.28958	0.00100338	0.0100229
ABCG4	15.1922	1.21586	0.338242	3.59465	0.000324825	0.0043686
ABHD3	325.932	1.17124	0.197187	5.93977	2.85418e-09	3.35117e-07
ABI3	262.988	1.37234	0.249246	5.50599	3.67105e-08	2.96773e-06
AC002480.3	1.17506	1.39387	0.416765	3.34449	0.00082433	0.00873577
AC004988.1	3.73719	1.43602	0.35834	4.00741	6.13876e-05	0.00121581
AC005083.1	3.74971	2.99558	0.535822	5.59062	2.26264e-08	1.95752e-06
AC006129.2	4.40225	2.63335	0.461163	5.71023	1.12824e-08	1.08737e-06
AC007386.4	2.16408	1.81048	0.442506	4.09143	4.28726e-05	0.000923228
AC007879.2	1.44419	1.29842	0.369066	3.51814	0.000434586	0.00542783
AC008060.7	2.78904	1.66502	0.558337	2.98211	0.00286273	0.0215528
AC009133.17	1.44536	2.88576	0.635097	4.54381	5.52453e-06	0.000180419
AC009299.3	1.18863	2.89162	0.55986	5.1649	2.40564e-07	1.44377e-05
AC010149.4	0.464059	1.86673	0.647755	2.88185	0.00395346	0.0272605
AC010731.2	4.10212	2.16608	0.558387	3.87917	0.000104812	0.00184375
AC011298.2	1.29535	1.3644	0.449031	3.03854	0.00237729	0.0188073
AC012512.1	2.95685	2.7031	0.513143	5.26773	1.38118e-07	9.12196e-06
AC016831.7	12.44	1.18248	0.292332	4.045	5.23231e-05	0.00107659
AC017002.1	0.584506	1.7848	0.628642	2.83914	0.00452351	0.030016
AC019206.1	0.794615	1.30382	0.4728	2.75766	0.00582161	0.0361111
AC021087.1	5.03486	1.05572	0.338183	3.12175	0.0017978	0.0153251
AC022182.1	0.492306	1.70073	0.624478	2.72344	0.00646056	0.0388163
AC022182.3	1.64333	1.33777	0.419056	3.19235	0.00141118	0.0128553
AC023590.1	1.04857	1.24638	0.469103	2.65694	0.00788534	0.0445072
AC024995.1	1.22223	1.63836	0.413767	3.95962	7.50698e-05	0.00143024
AC058791.1	30.9131	1.66059	0.266605	6.22865	4.70484e-10	6.99531e-08
AC069363.1	2.21279	4.05204	0.539667	7.5084	5.98534e-14	3.05335e-11
AC074389.6	1.3124	2.13593	0.528238	4.04351	5.26569e-05	0.0010812
AC078883.3	2.38759	1.14013	0.425516	2.6794	0.00737548	0.0426139
AC079135.1	1.06746	2.1937	0.63517	3.45372	0.000552911	0.00649704
AC079767.4	7.71115	2.21539	0.446039	4.96681	6.80636e-07	3.33422e-05
AC079796.1	4.28974	2.27602	0.769965	2.95601	0.00311647	0.0229251
AC083843.4	68.0918	1.85868	0.346725	5.36067	8.29139e-08	5.87359e-06
AC083884.8	6.61335	1.92958	0.366144	5.26999	1.3643e-07	9.05089e-06
AC083949.1	0.887399	2.81773	0.614623	4.58448	4.55107e-06	0.000154956
AC087350.1	4.42398	1.0019	0.336784	2.97489	0.0029309	0.0219155
AC090810.1	1.47325	1.67241	0.398372	4.19811	2.6915e-05	0.000635509
AC091814.3	0.761933	2.16777	0.613011	3.53626	0.000405838	0.00516471
AC092580.4	4.31124	1.9031	0.44966	4.2323	2.31312e-05	0.000558437
AC093063.2	1.4359	4.01672	1.09193	3.67854	0.000234573	0.00344443
AC093106.5	1.49675	1.13149	0.37459	3.02062	0.00252256	0.0196068
AC093484.4	1.11894	1.24295	0.414859	2.99609	0.00273469	0.0208166
AC093616.4	4.17566	1.94389	0.359587	5.40591	6.44802e-08	4.7696e-06
AC093642.3	11.0833	1.05384	0.330107	3.19242	0.00141085	0.0128553
AC096558.1	0.496358	1.69419	0.637661	2.65688	0.00788668	0.0445072
AC104654.2	3.8261	2.28005	0.442552	5.15206	2.57645e-07	1.52464e-05
AC104699.1	0.754004	2.34041	0.681718	3.4331	0.000596712	0.00688861
AC104820.2	1.50846	3.53349	0.712007	4.96272	6.95124e-07	3.35682e-05
AC104986.1	1.29878	1.20509	0.452571	2.66276	0.00775016	0.0440109
AC108463.1	1.38249	1.44182	0.427642	3.37155	0.00074746	0.00810995
AC108463.2	2.99812	2.07384	0.391235	5.30076	1.15322e-07	7.86211e-06
AC110781.3	715.33	2.08152	0.450094	4.62463	3.75268e-06	0.000132499
AC114730.7	1.15947	1.16429	0.409418	2.84376	0.00445842	0.0296833
AC116366.6	24.3105	1.25221	0.310791	4.02911	5.59881e-05	0.00113464
AC130469.1	2.6904	1.11834	0.369926	3.02315	0.00250162	0.0195041
AC133644.2	5.42664	3.21093	0.472373	6.79745	1.0649e-11	2.67018e-09
AC242988.1	0.661581	1.28955	0.451991	2.85305	0.0043302	0.0290988
ACAN	124.625	1.6362	0.390486	4.19016	2.78757e-05	0.000654072
ACAP1	176.846	1.20091	0.220886	5.43676	5.42595e-08	4.09969e-06
ACKR1	46.9491	1.50288	0.451056	3.33191	0.000862519	0.0090369
ACKR4	4.02855	1.01492	0.363775	2.78996	0.00527153	0.0336151
ACPP	7.83834	1.9902	0.461362	4.31374	1.60513e-05	0.000416238
ACRC	43.3572	1.37485	0.250732	5.48336	4.17327e-08	3.29276e-06
ACSBG1	199.38	1.41543	0.431107	3.28323	0.00102625	0.010182
ACY3	16.4957	1.68665	0.386161	4.36774	1.2554e-05	0.000344572
ADAM19	128.84	1.22428	0.322257	3.79909	0.000145231	0.00238198
ADAM23	3729.78	1.23462	0.368467	3.35071	0.000806054	0.00860683
ADAM28	50.0882	1.52859	0.290508	5.26179	1.42663e-07	9.38025e-06
ADAM33	394.316	1.04621	0.35281	2.96536	0.00302327	0.0223799
ADAMDEC1	73.0807	3.83219	0.611909	6.26267	3.78432e-10	5.86233e-08
ADAMTS14	133.93	1.76413	0.364916	4.83435	1.3358e-06	5.61414e-05
ADAMTS18	1.98374	1.53802	0.562921	2.73222	0.0062909	0.0380411
ADAMTS19-AS1	1.49673	1.80099	0.521373	3.45432	0.000551689	0.00648525
ADAMTS2	790.48	1.66784	0.363028	4.59425	4.34314e-06	0.000148732
ADAMTS4	87.9965	1.01401	0.229639	4.41569	1.00687e-05	0.000288674
ADAMTS5	35.4203	1.14018	0.311041	3.66569	0.000246668	0.00357941
ADAMTS7P4	1.56712	2.64928	0.542423	4.88415	1.03878e-06	4.58684e-05
ADCY2	190.361	1.78322	0.409925	4.35011	1.36067e-05	0.000366198
ADCYAP1R1	7.01013	1.44622	0.45365	3.18795	0.00143285	0.0129966
ADD2	94.5969	1.29385	0.305596	4.23386	2.29713e-05	0.000555745
ADGRE1	11.8454	1.77457	0.323969	5.47759	4.31157e-08	3.37489e-06
ADGRE4P	4.70794	2.25702	0.461092	4.89494	9.83352e-07	4.39508e-05
ADGRG5	16.314	1.29931	0.337733	3.84717	0.000119492	0.00204248
ADGRG6	38.2563	1.2683	0.247733	5.1196	3.06185e-07	1.7523e-05
ADGRV1	13.2434	1.16438	0.270546	4.3038	1.67894e-05	0.000433817
ADM2	183.45	1.08399	0.312115	3.47305	0.000514581	0.00615063
ADPGK-AS1	4.83239	1.09041	0.288782	3.77591	0.000159426	0.00255531
AF127936.3	1.18392	1.98838	0.493248	4.0312	5.54931e-05	0.00112538
AF127936.5	2.76817	2.11705	0.440109	4.81028	1.50716e-06	6.20219e-05
AF165138.7	0.788881	2.45247	0.749916	3.27032	0.00107424	0.0105143
AGBL1	0.861298	1.1461	0.429387	2.66915	0.00760441	0.0434278
AGPAT4-IT1	1.05225	1.87897	0.477509	3.93493	8.32196e-05	0.00154764
AIF1	392.765	1.20245	0.229968	5.22879	1.70623e-07	1.08801e-05
AIM1L	2.41531	1.26227	0.458844	2.75098	0.00594174	0.0366182
AIM2	14.4411	3.14494	0.512415	6.13748	8.38412e-10	1.19264e-07
AK5	34.0536	1.8853	0.399459	4.71963	2.36271e-06	8.98558e-05
AKAP5	20.7448	1.9735	0.346106	5.70201	1.18406e-08	1.13746e-06
ALDH3B2	3.79741	1.79132	0.520582	3.44098	0.000579603	0.00674681
ALDH8A1	6.3597	1.13405	0.337957	3.35561	0.000791893	0.00848625
ALOX15B	55.36	1.6188	0.455143	3.55668	0.000375577	0.0048569
ALPK2	4.58136	1.3948	0.415345	3.35816	0.000784622	0.00842358
ALS2CR12	57.45	1.18036	0.231916	5.08959	3.58842e-07	1.96619e-05
AMICA1	171.733	1.41435	0.263448	5.36863	7.93366e-08	5.68567e-06
ANKRD2	6.79519	2.09945	0.61502	3.41363	0.000641046	0.00724772
ANKRD20A10P	1.99632	3.52779	0.867718	4.06559	4.7911e-05	0.00100467
ANKRD22	13.2922	2.96408	0.526891	5.62561	1.84856e-08	1.66246e-06
ANKRD26P3	4.9685	2.00105	0.443659	4.51033	6.47277e-06	0.000203741
ANKRD30BP1	14.8285	1.32061	0.459767	2.87234	0.00407443	0.0277967
ANKRD33B	66.8513	1.88242	0.317511	5.92867	3.05407e-09	3.53962e-07
ANKRD36BP2	14.9926	2.34969	0.464627	5.05715	4.25563e-07	2.26875e-05
ANKRD44	918.994	1.07027	0.178012	6.01235	1.82855e-09	2.33203e-07
ANO4	45.3947	1.50714	0.379415	3.97226	7.1194e-05	0.00136874
ANPEP	147.412	1.64827	0.308117	5.34948	8.82084e-08	6.19931e-06
AOAH	152.05	1.0237	0.288571	3.54749	0.00038892	0.0050032
AP000265.1	0.931377	1.0527	0.375623	2.80254	0.00507012	0.0326261
AP000295.10	2.42983	1.40536	0.32126	4.37455	1.21686e-05	0.000335926
AP000439.1	7.937	2.24299	0.475372	4.71839	2.37719e-06	9.02904e-05
AP000476.1	1.41322	2.0996	0.58504	3.58881	0.000332189	0.00443939
AP000695.4	1.22224	1.32916	0.414295	3.20824	0.00133551	0.0123485
AP001205.1	3.14603	1.21991	0.327092	3.72958	0.000191802	0.00293587
AP001350.4	29.9127	1.57567	0.322739	4.88218	1.04918e-06	4.60581e-05
AP003774.1	1.93746	1.73153	0.421581	4.10723	4.00428e-05	0.000872338
AP1S3	134.77	1.51768	0.271966	5.58041	2.3995e-08	2.05787e-06
APBB1IP	125.238	1.24866	0.270168	4.6218	3.80426e-06	0.000133841
APOBR	184.002	1.35058	0.254704	5.30254	1.14202e-07	7.8037e-06
APOC2	1.3903	1.95768	0.463452	4.22413	2.3987e-05	0.000576078
APOC4-APOC2	1.6311	1.2205	0.421218	2.89754	0.00376096	0.0262761
APOL1	1798.2	3.00475	0.377911	7.95093	1.85109e-15	1.56486e-12
APOL3	520.504	2.63684	0.343844	7.66871	1.73741e-14	1.1955e-11
APOL4	76.9196	2.1944	0.325659	6.73834	1.60206e-11	3.70326e-09
APOL6	1294.85	2.24495	0.277006	8.10433	5.30385e-16	5.84269e-13
AQP3	30.2967	1.65162	0.312708	5.28167	1.28013e-07	8.57448e-06
ARC	164.245	2.65359	0.388059	6.83811	8.02435e-12	2.15841e-09
AREG	1.92461	1.9315	0.631139	3.06034	0.00221087	0.017873
ARFGEF1	2450.1	1.07497	0.209161	5.13946	2.75528e-07	1.61432e-05
ARHGAP19-SLIT1	1.06071	3.26856	0.769076	4.24998	2.1379e-05	0.00052321
ARHGAP25	177.155	1.18963	0.235522	5.05103	4.39427e-07	2.33006e-05
ARHGAP30	298.396	1.19165	0.243151	4.90085	9.5423e-07	4.3105e-05
ARHGAP9	145.666	1.48803	0.263803	5.64067	1.6939e-08	1.53739e-06
ARHGDIG	219.461	1.33995	0.367299	3.64813	0.000264157	0.00376487
ARL11	18.6018	1.37111	0.254789	5.38135	7.39303e-08	5.34829e-06
ARMC9	4153.63	1.26698	0.211889	5.97944	2.239e-09	2.77653e-07
ARNTL2	9.09426	1.96605	0.339851	5.78503	7.25013e-09	7.39713e-07
ARRDC5	2.20597	2.36601	0.485568	4.87267	1.10098e-06	4.79057e-05
ASAP1-IT2	3.02665	1.19189	0.365005	3.26541	0.00109304	0.0106455
ASCL2	25.4486	1.19777	0.274776	4.35907	1.30614e-05	0.00035396
ASIP	34.2937	1.25021	0.394895	3.16592	0.00154593	0.0137732
ATCAY	15.1257	1.49345	0.541046	2.76029	0.00577495	0.0358894
ATP12A	0.941071	2.02865	0.640208	3.16874	0.001531	0.0136897
ATP6V0D2	43.4535	2.3999	0.541244	4.43405	9.24791e-06	0.000270116
ATP8B4	28.55	1.16858	0.256015	4.5645	5.00676e-06	0.000167414
AVPR1A	13.6579	1.23244	0.319693	3.85509	0.000115689	0.00199475
B3GALT2	7.08895	2.83997	0.394699	7.19529	6.23274e-13	2.41417e-10
B4GALNT1	53.9698	1.81109	0.335355	5.40052	6.64487e-08	4.87862e-06
BAG2	320.419	1.88564	0.268263	7.02906	2.07927e-12	6.91253e-10
BANCR	604.482	1.24919	0.424616	2.94194	0.00326168	0.023602
BANK1	6.99375	1.96034	0.494444	3.96473	7.34788e-05	0.00140536
BARHL2	3.18088	1.61339	0.568897	2.83599	0.0045684	0.0302123
BARX1	7.20865	1.22203	0.44504	2.74589	0.00603473	0.036991
BARX2	0.896882	1.71324	0.605648	2.82878	0.00467265	0.03073
BATF	44.5706	2.21215	0.37646	5.87618	4.19846e-09	4.6877e-07
BATF3	35.7625	1.10118	0.21277	5.17546	2.27347e-07	1.37843e-05
BCAT1	288.414	1.17378	0.340212	3.45013	0.000560324	0.0065607
BCL11B	41.3198	2.8089	0.338187	8.30578	9.91687e-17	1.63011e-13
BCL2A1	23.3486	1.25994	0.380947	3.30738	0.000941738	0.00962492
BHLHA15	6.24037	2.32423	0.439188	5.29211	1.20915e-07	8.16814e-06
BHLHE40-AS1	12.3723	1.39557	0.289995	4.81241	1.49121e-06	6.14512e-05
BIN2	90.1412	1.81858	0.28311	6.42358	1.33104e-10	2.41613e-08
BIRC3	84.9317	1.95369	0.343765	5.68322	1.32182e-08	1.25353e-06
BLK	45.4051	1.15632	0.374384	3.08858	0.00201113	0.0166356
BLNK	52.4444	1.23422	0.239239	5.15893	2.4836e-07	1.48237e-05
BTBD16	1.3542	1.56492	0.468256	3.34203	0.000831683	0.00879165
BTLA	5.79771	3.19847	0.507321	6.30463	2.88883e-10	4.69642e-08
BTN3A1	1714.27	1.29799	0.230406	5.63348	1.76614e-08	1.59806e-06
BTN3A3	1672.37	1.52374	0.211801	7.1942	6.28264e-13	2.41417e-10
BX470102.3	2.23863	1.57367	0.382045	4.11908	3.80394e-05	0.000837434
C10orf105	1.42774	1.86151	0.533539	3.48898	0.000484864	0.00589891
C11orf21	9.665	1.00604	0.33585	2.99552	0.00273979	0.0208457
C16orf54	31.3337	2.4964	0.387615	6.44041	1.19149e-10	2.23125e-08
C1QA	4857.54	1.25566	0.277195	4.52988	5.90162e-06	0.00018939
C1QB	5105.19	1.52175	0.291354	5.22302	1.76031e-07	1.11529e-05
C1QC	4252.21	1.35658	0.275853	4.91776	8.75403e-07	4.02821e-05
C1S	1674.99	1.10893	0.339458	3.26676	0.00108786	0.0106159
C1orf116	821.972	1.74721	0.465224	3.75563	0.000172906	0.00272095
C1orf147	2.36092	1.07723	0.300179	3.58863	0.000332424	0.00444053
C2orf66	4.81179	1.50667	0.435915	3.45633	0.00054758	0.00644939
C3orf36	2.3992	1.05145	0.35655	2.94896	0.00318842	0.0232914
C4orf50	1.2664	2.63362	0.656393	4.01226	6.01399e-05	0.00119665
C5orf58	1.43397	3.01049	0.543304	5.54107	3.00633e-08	2.50567e-06
C8orf37-AS1	2.44329	1.25427	0.348021	3.604	0.000313359	0.00426087
CA12	816.384	4.01818	0.474539	8.46755	2.50611e-17	4.63442e-14
CA13	31.2093	1.04234	0.27359	3.80987	0.000139038	0.00230468
CA8	155.047	1.5864	0.516894	3.0691	0.00214707	0.0174574
CABP4	8.66387	1.91996	0.343073	5.59636	2.18899e-08	1.89935e-06
CABP7	225.904	3.16154	0.520393	6.07529	1.23766e-09	1.67214e-07
CACNA1I	6.61608	1.26175	0.40357	3.12647	0.00176916	0.0151639
CACNG4	6.08663	1.58597	0.320302	4.9515	7.36449e-07	3.50887e-05
CALB1	10.9083	1.22841	0.417376	2.94316	0.00324879	0.0235486
CALB2	20.3704	2.00218	0.505899	3.95767	7.5686e-05	0.0014392
CALCR	3.35761	1.59106	0.454163	3.50328	0.00045956	0.00565853
CALHM1	1.03468	1.44015	0.423453	3.40098	0.000671456	0.00749699
CALY	8.94819	1.78854	0.461922	3.87196	0.000107964	0.00188796
CAPN13	2.7505	1.352	0.434097	3.11451	0.0018425	0.0156071
CASP1	259.037	1.33526	0.260244	5.13081	2.88497e-07	1.67702e-05
CASP10	75.1282	1.00603	0.212194	4.74108	2.12584e-06	8.27625e-05
CASP12	2.77853	1.59995	0.458924	3.48629	0.000489761	0.00594383
CASP5	2.68474	2.65229	0.493774	5.37146	7.81024e-08	5.62262e-06
CASS4	11.4329	1.17753	0.279672	4.21038	2.54939e-05	0.000608181
CBLN2	3.85682	1.81	0.482751	3.74935	0.00017729	0.00277643
CBLN4	3.73704	1.882	0.622527	3.02317	0.00250143	0.0195041
CCBE1	5.29915	1.13755	0.435383	2.61275	0.00898157	0.0489495
CCDC144CP	1.05654	1.16703	0.447972	2.60514	0.00918373	0.0496852
CCDC162P	2.25835	1.71456	0.418387	4.09803	4.16689e-05	0.000900583
CCDC177	13.1547	1.03624	0.293087	3.53561	0.000406829	0.00517286
CCDC188	27.8866	1.56795	0.277582	5.64858	1.61777e-08	1.48333e-06
CCDC36	7.95621	1.62676	0.418527	3.88688	0.000101542	0.00180881
CCDC7	1352.08	1.17197	0.4314	2.71667	0.0065942	0.0394001
CCL18	332.532	2.08545	0.471121	4.42657	9.57445e-06	0.000277642
CCL20	1.22702	1.54383	0.487528	3.16665	0.00154208	0.0137431
CCL21	20.7983	1.98741	0.538776	3.68876	0.000225353	0.00333475
CCL22	7.85907	1.41406	0.52742	2.68109	0.00733823	0.0424733
CCL24	12.7086	1.78313	0.536465	3.32385	0.000887831	0.00921078
CCL3	73.6735	1.56277	0.31512	4.95927	7.07583e-07	3.3877e-05
CCL4	93.1226	2.60415	0.33178	7.84902	4.19314e-15	3.26491e-12
CCL4L2	39.9822	1.96809	0.364577	5.39829	6.72772e-08	4.91506e-06
CCL5	682.719	2.38748	0.360893	6.61547	3.70384e-11	7.88412e-09
CCNE2	33.3504	1.11691	0.26258	4.25358	2.10378e-05	0.000517859
CCR1	132.806	1.12439	0.252244	4.45756	8.28965e-06	0.000249262
CCR2	19.102	1.69405	0.414991	4.08213	4.46254e-05	0.00095276
CCR3	0.460304	1.92338	0.681489	2.82233	0.00476767	0.0311886
CCR4	6.29798	2.58446	0.474463	5.44712	5.11931e-08	3.89383e-06
CCR5	102.684	2.36726	0.379385	6.23972	4.38356e-10	6.61739e-08
CCR7	27.2424	2.23974	0.442453	5.06211	4.14638e-07	2.22252e-05
CCR8	0.928572	3.15701	0.982866	3.21205	0.00131793	0.0122329
CCRL2	32.4715	1.25781	0.250105	5.02912	4.92744e-07	2.57585e-05
CD109	446.89	1.53754	0.346742	4.43426	9.23892e-06	0.000270116
CD163	519.741	1.12252	0.26296	4.2688	1.96529e-05	0.000488238
CD163L1	185.426	2.01407	0.326274	6.17293	6.70339e-10	9.77044e-08
CD180	60.4561	1.23411	0.284785	4.33347	1.46776e-05	0.000388445
CD1A	0.826205	1.53103	0.58049	2.63747	0.00835267	0.0464643
CD1C	7.5989	1.22596	0.431101	2.84378	0.00445813	0.0296833
CD2	160.168	3.23667	0.425883	7.5999	2.96361e-14	1.74685e-11
CD200R1	17.8471	2.04215	0.368162	5.54688	2.90807e-08	2.44443e-06
CD209	442.117	1.5485	0.312065	4.96213	6.97247e-07	3.35996e-05
CD247	67.0726	2.25062	0.34208	6.57922	4.72924e-11	9.78522e-09
CD27	116.585	3.15069	0.36252	8.69108	3.58999e-18	1.06221e-14
CD28	58.4852	1.16369	0.249909	4.65646	3.21699e-06	0.00011622
CD300A	114.382	1.45891	0.245173	5.95055	2.67247e-09	3.2015e-07
CD300LF	45.7282	1.87845	0.335448	5.59982	2.14574e-08	1.87835e-06
CD38	100.086	2.44403	0.323836	7.54711	4.45032e-14	2.39411e-11
CD3D	99.6955	3.5019	0.423098	8.27679	1.26535e-16	1.85338e-13
CD3E	264.296	2.71145	0.416942	6.50318	7.86385e-11	1.55117e-08
CD3G	33.4704	3.4516	0.430836	8.0114	1.13405e-15	1.04858e-12
CD40LG	5.92889	1.58614	0.463101	3.42505	0.000614692	0.00703035
CD48	269.381	1.23805	0.395094	3.13356	0.00172702	0.0149325
CD5	63.2598	2.11287	0.373593	5.65553	1.5537e-08	1.44109e-06
CD52	143.742	2.11078	0.356152	5.92662	3.09242e-09	3.56025e-07
CD53	365.458	1.7002	0.268395	6.33469	2.37825e-10	3.99816e-08
CD5L	63.7594	5.92003	0.723953	8.17736	2.90131e-16	3.73234e-13
CD6	154.976	1.21245	0.266367	4.55179	5.31905e-06	0.000175061
CD69	14.1457	2.10677	0.38746	5.43739	5.40671e-08	4.09969e-06
CD7	104.123	2.21478	0.350515	6.31864	2.63872e-10	4.3954e-08
CD70	77.4688	1.9907	0.507565	3.92206	8.7796e-05	0.00161549
CD79A	69.5236	1.63251	0.371141	4.39862	1.08942e-05	0.000307868
CD84	132.171	1.54585	0.266831	5.79336	6.89905e-09	7.06329e-07
CD86	117.207	1.49037	0.246229	6.05278	1.42371e-09	1.89751e-07
CD8A	285.334	3.66422	0.427879	8.56368	1.0932e-17	2.3104e-14
CD8B	56.8682	3.491	0.458475	7.61437	2.64988e-14	1.6271e-11
CD96	48.6299	2.85812	0.409658	6.97684	3.01896e-12	9.40264e-10
CDH17	5.07366	1.76231	0.438645	4.01761	5.87918e-05	0.00117805
CEACAM21	16.7295	1.13086	0.309441	3.65451	0.00025767	0.0036988
CEACAM3	1.01276	1.39821	0.521564	2.68081	0.00734446	0.0424928
CELF2	1278.7	1.40298	0.336849	4.165	3.11347e-05	0.000711912
CELF2-AS1	1.87238	1.31043	0.488636	2.6818	0.00732263	0.042416
CELF3	7.58742	1.90482	0.521481	3.65271	0.00025949	0.00371446
CEND1	18.4866	1.17214	0.296809	3.94913	7.84368e-05	0.00148009
CENPE	49.143	1.15687	0.279889	4.13333	3.57542e-05	0.000794009
CERKL	55.2531	1.66373	0.369292	4.5052	6.6312e-06	0.000207185
CES1	197.903	1.47789	0.510386	2.89564	0.00378387	0.0263988
CES1P1	6.76949	1.805	0.591252	3.05285	0.0022668	0.0181803
CFP	62.8634	1.01525	0.276668	3.66958	0.000242952	0.00354111
CHAC1	3676.48	2.07433	0.376458	5.51012	3.58592e-08	2.91484e-06
CHI3L2	52.9476	1.22276	0.428379	2.8544	0.0043118	0.0290006
CHIT1	990.269	2.04261	0.577649	3.53606	0.000406136	0.00516627
CHRM3-AS2	1.18211	2.44699	0.667337	3.6668	0.000245603	0.00356745
CHRNA1	18.5207	1.68079	0.51061	3.29174	0.000995702	0.00998643
CHRNA4	12.7212	2.29715	0.474532	4.84088	1.29265e-06	5.50316e-05
CIITA	256.251	1.79271	0.255639	7.01268	2.33794e-12	7.43818e-10
CILP	40.1914	1.17886	0.35848	3.2885	0.00100725	0.0100514
CLCNKA	198.342	1.10499	0.236432	4.67362	2.95931e-06	0.000108088
CLDN18	3.46331	1.33569	0.318584	4.19258	2.75798e-05	0.000648672
CLDN4	33.1988	1.63118	0.353556	4.61364	3.95682e-06	0.000137573
CLEC12A	11.0876	2.54694	0.432208	5.89285	3.7958e-09	4.28664e-07
CLEC1B	0.565165	1.91855	0.635433	3.01927	0.00253382	0.0196619
CLEC2L	3.73433	1.61594	0.496755	3.25299	0.00114198	0.0109883
CLEC4E	11.3693	1.49552	0.369992	4.04204	5.29879e-05	0.00108574
CLEC7A	43.2055	1.57357	0.284555	5.52992	3.20377e-08	2.65318e-06
CLEC9A	7.73384	1.46141	0.416674	3.50732	0.000452644	0.00558499
CLECL1	5.66371	1.88044	0.359014	5.23778	1.62518e-07	1.04534e-05
CLIC2	155.148	2.36357	0.295531	7.99772	1.26744e-15	1.13639e-12
CLNK	2.37119	2.86328	0.535532	5.3466	8.96216e-08	6.2837e-06
CMAHP	23.6348	1.12047	0.283158	3.95705	7.58819e-05	0.00144107
CMB9-22P13.1	179.382	2.0308	0.299992	6.76952	1.29215e-11	3.10829e-09
CMB9-22P13.2	0.851177	3.21414	0.930173	3.45542	0.000549429	0.00646382
CNR2	2.02046	1.92833	0.488486	3.94756	7.89509e-05	0.0014879
CNTF	47.4725	1.57154	0.36627	4.29065	1.78147e-05	0.000452695
CNTNAP2	15.4461	2.06009	0.506898	4.06412	4.82132e-05	0.00100815
COL12A1	173.184	1.18273	0.297766	3.972	7.12704e-05	0.00136932
COL22A1	549.737	3.04042	0.354546	8.57553	9.86306e-18	2.3104e-14
COLGALT2	215.816	1.08139	0.338044	3.19896	0.00137925	0.0126462
CORO1A	800.999	1.71091	0.283747	6.0297	1.64259e-09	2.14632e-07
CORO6	106.539	1.58314	0.333857	4.74197	2.11647e-06	8.26148e-05
CR1	14.6366	1.20944	0.343795	3.51791	0.000434959	0.00542999
CR1L	3.24907	1.40394	0.465239	3.01768	0.00254718	0.01973
CR2	1.09162	2.68892	0.717821	3.74595	0.000179714	0.002806
CRABP2	110.918	1.56982	0.267281	5.8733	4.272e-09	4.71641e-07
CRIP1	16.0552	1.1867	0.32868	3.61052	0.000305589	0.00418988
CRTAM	15.7037	3.4017	0.449625	7.56565	3.85939e-14	2.13284e-11
CRYM	61.0998	1.21296	0.365967	3.3144	0.000918413	0.00944526
CSF2RA	190.886	1.09895	0.290088	3.78834	0.000151657	0.00245874
CSF2RB	50.112	1.53612	0.26479	5.80125	6.58215e-09	6.88172e-07
CST7	136.153	2.80964	0.365308	7.69115	1.4582e-14	1.02727e-11
CSTA	16.6599	1.35841	0.264523	5.13533	2.81654e-07	1.64695e-05
CTA-212A2.1	4.35255	1.87349	0.424687	4.41146	1.02675e-05	0.000293237
CTA-250D10.19	0.880594	1.27502	0.474405	2.68762	0.00719641	0.0418819
CTA-384D8.34	0.659187	1.99997	0.646849	3.09187	0.00198902	0.016508
CTA-384D8.35	2.17413	2.69169	0.545071	4.93823	7.8836e-07	3.69082e-05
CTB-108O6.2	0.640839	1.55272	0.533436	2.91078	0.00360524	0.0254891
CTB-113D17.1	2.45193	1.10208	0.371049	2.97016	0.00297642	0.022155
CTB-39G8.3	3.21861	1.67203	0.339824	4.92029	8.64176e-07	3.98275e-05
CTC-436P18.5	2.14306	1.54823	0.369797	4.18671	2.83026e-05	0.000660424
CTC-458I2.2	0.965113	1.46205	0.415322	3.52029	0.000431076	0.00539995
CTC-548K16.1	6.37226	1.22943	0.426791	2.88063	0.00396877	0.0273025
CTC-575N7.1	25.0319	1.07522	0.301499	3.56626	0.000362113	0.00472408
CTD-2015G9.2	1.4946	2.06453	0.431979	4.77925	1.75951e-06	7.10323e-05
CTD-2023M8.1	0.703238	2.54527	0.920585	2.76484	0.00569505	0.0355346
CTD-2024I7.18	1.6782	1.03248	0.343872	3.00252	0.0026775	0.0204691
CTD-2116N20.1	0.918755	1.78815	0.529142	3.37934	0.000726605	0.00795073
CTD-2201I18.1	6.19085	1.90395	0.372388	5.1128	3.1741e-07	1.79914e-05
CTD-2215E18.1	0.468656	1.31115	0.502962	2.60686	0.0091376	0.0495171
CTD-2231H16.1	75.3346	1.31894	0.329029	4.00858	6.10838e-05	0.00121228
CTD-2313F11.1	0.916791	3.186	0.892614	3.56929	0.000357947	0.00468005
CTD-2314G24.2	3.91292	2.22123	0.490285	4.53049	5.88473e-06	0.000189115
CTD-2341M24.1	32.5418	1.57675	0.303574	5.19396	2.05873e-07	1.27434e-05
CTD-2349P21.3	2.16272	1.05372	0.395063	2.66723	0.00764793	0.0436174
CTD-2353F22.1	1.05596	1.71889	0.550809	3.12066	0.00180448	0.0153646
CTD-2357A8.3	1.00984	2.44047	0.603169	4.04608	5.20817e-05	0.00107375
CTD-2547L24.3	5.38525	1.8375	0.375493	4.89356	9.90283e-07	4.41273e-05
CTD-2552K11.2	2.17045	2.59167	0.524217	4.9439	7.65766e-07	3.61363e-05
CTD-2555A7.2	0.777164	1.39536	0.461348	3.02454	0.00249014	0.0194351
CTD-3035K23.3	2.25038	1.19925	0.39627	3.02636	0.00247521	0.0193542
CTD-3035K23.7	4.46838	1.66771	0.346485	4.81322	1.48517e-06	6.1373e-05
CTD-3064M3.3	15.4198	1.48888	0.319801	4.65565	3.22961e-06	0.000116392
CTD-3064M3.7	35.8266	1.82725	0.500615	3.65	0.000262242	0.00374479
CTD-3187F8.14	0.679355	1.21219	0.457892	2.64732	0.00811314	0.0454746
CTD-3214K23.1	2.23379	1.06971	0.390276	2.74091	0.00612702	0.0373555
CTD-3239E11.2	0.833671	1.1417	0.434932	2.62501	0.00866471	0.0477148
CTLA4	7.96244	4.0246	0.595932	6.75346	1.44358e-11	3.417e-09
CTRC	0.939984	1.98635	0.582408	3.41059	0.000648227	0.00732045
CTSE	1.88743	1.96805	0.669506	2.93956	0.00328674	0.0237666
CTSS	1476.84	1.68349	0.263993	6.37703	1.80551e-10	3.16103e-08
CTSW	113.633	2.17025	0.363194	5.97545	2.29458e-09	2.82883e-07
CXCL1	4.22514	1.20278	0.403054	2.98417	0.0028435	0.0214462
CXCL10	113.722	3.2451	0.439943	7.37619	1.62885e-13	7.41453e-11
CXCL11	20.7784	2.22046	0.457142	4.85726	1.19021e-06	5.12605e-05
CXCL13	39.608	5.85588	0.707901	8.27217	1.31543e-16	1.85338e-13
CXCL2	5.16847	1.46253	0.336597	4.34504	1.39253e-05	0.000373547
CXCL8	14.0035	1.18708	0.411578	2.88422	0.00392382	0.0271193
CXCL9	336.564	4.48026	0.456053	9.82399	8.87576e-23	2.62616e-18
CXCR2P1	70.3709	3.29796	0.511701	6.44509	1.15529e-10	2.17725e-08
CXCR3	98.0757	2.91756	0.44006	6.62991	3.35885e-11	7.25414e-09
CXCR6	49.8101	2.95313	0.414871	7.11819	1.09356e-12	3.9946e-10
CXorf21	11.2652	1.71841	0.3347	5.13418	2.83378e-07	1.65377e-05
CYBB	378.112	1.16674	0.256034	4.55697	5.18971e-06	0.000172338
CYP24A1	25.0643	1.44372	0.500863	2.88247	0.00394575	0.0272328
CYP51A1P2	1.23871	1.22056	0.357209	3.41693	0.00063332	0.00718507
CYSLTR1	13.044	1.57102	0.305569	5.14128	2.72868e-07	1.60191e-05
CYSLTR2	1107.68	3.64879	0.6519	5.59716	2.17896e-08	1.89809e-06
CYTIP	46.1558	2.33345	0.343647	6.79026	1.11932e-11	2.73706e-09
DAPP1	15.2449	2.64143	0.386953	6.82623	8.71737e-12	2.28256e-09
DCAF4L1	8.77862	1.15593	0.357647	3.23203	0.00122913	0.0116153
DCLRE1CP1	0.955191	2.01065	0.561325	3.58197	0.000341016	0.00451858
DCSTAMP	47.9626	4.14127	0.551113	7.51437	5.71862e-14	2.96847e-11
DCX	3.44638	1.25975	0.469241	2.68466	0.00726036	0.0421545
DEPDC1	37.3963	1.01792	0.264828	3.8437	0.000121191	0.00206436
DERL3	84.7168	1.35754	0.303985	4.4658	7.97693e-06	0.000242322
DHRS9	13.0675	1.64232	0.482401	3.40448	0.000662912	0.0074292
DLEU7	7.0072	1.08922	0.340274	3.20101	0.00136949	0.0125801
DLL4	709.336	1.46539	0.276189	5.30576	1.12202e-07	7.7026e-06
DLX5	12.252	1.16013	0.269084	4.31142	1.62209e-05	0.000420266
DNAH17-AS1	10.546	1.12689	0.343331	3.28221	0.00102996	0.0102024
DNAJC5B	5.76584	1.91055	0.490113	3.89818	9.69197e-05	0.00174538
DNASE2B	8.25348	1.84896	0.422254	4.37878	1.19346e-05	0.000331258
DOCK10	569.585	1.2102	0.334503	3.6179	0.000297003	0.00410258
DOCK2	226.946	1.22277	0.281687	4.34089	1.41906e-05	0.000378603
DOCK4	145.284	1.0362	0.253874	4.08155	4.47355e-05	0.000953773
DOK2	148.21	1.32879	0.272117	4.88313	1.04413e-06	4.59043e-05
DPEP1	7.68494	1.98831	0.443596	4.48226	7.38583e-06	0.000228113
DPEP3	9.04681	1.52426	0.393309	3.87547	0.000106418	0.00186423
DPYD	116.542	1.08644	0.293656	3.6997	0.000215851	0.00322555
DPYS	11.154	3.13294	0.469028	6.67964	2.39529e-11	5.24976e-09
DRD1	2.284	1.54913	0.524486	2.95362	0.00314067	0.0230491
DTHD1	5.64129	3.99104	0.56207	7.1006	1.24212e-12	4.48194e-10
DUSP5P1	1.934	1.94244	0.555408	3.49732	0.000469963	0.0057531
DUTP6	6.9468	1.30057	0.265453	4.89942	9.61215e-07	4.33543e-05
DYSF	1026.55	1.15914	0.285135	4.06523	4.79858e-05	0.00100553
EBF2	19.0462	1.115	0.307597	3.62486	0.000289123	0.00402758
EBI3	68.1824	1.30562	0.263156	4.96139	6.99897e-07	3.36553e-05
ECM1	2031.74	2.35845	0.340555	6.92531	4.35031e-12	1.3408e-09
EDIL3	55.3056	1.42167	0.267166	5.3213	1.0303e-07	7.13923e-06
EEF1A2	4100.99	1.7032	0.418108	4.07359	4.62939e-05	0.000976296
EEF1DP5	5.93004	2.52892	0.614332	4.11653	3.84611e-05	0.000843578
EGFLAM	63.933	1.01003	0.268789	3.75771	0.000171474	0.00270446
EGR2	69.9013	1.17605	0.299384	3.92822	8.55764e-05	0.00158351
EGR3	96.3616	1.75734	0.352366	4.98726	6.12422e-07	3.06087e-05
ELAVL3	4.6259	1.16279	0.436831	2.66188	0.00777055	0.0440788
EMB	85.9837	1.39671	0.282276	4.94802	7.4973e-07	3.54787e-05
ENTHD1	8.46676	1.96434	0.466582	4.21007	2.55293e-05	0.000608181
EOMES	124.631	2.20688	0.37623	5.86578	4.47017e-09	4.89865e-07
EPSTI1	129.197	1.38661	0.368503	3.76281	0.000168015	0.00265699
ERAP2	405.079	1.30784	0.328029	3.98696	6.69251e-05	0.00130275
ERN2	1.7574	1.19954	0.423904	2.82975	0.0046584	0.0306704
ERVMER34-1	65.0306	1.84909	0.31079	5.94965	2.68719e-09	3.20599e-07
ETV7	222.367	1.47969	0.407697	3.62939	0.000284094	0.00398567
EVI2A	36.1914	1.70383	0.286626	5.94442	2.77445e-09	3.2968e-07
EVI2B	110.283	1.85844	0.301619	6.16155	7.20365e-10	1.04481e-07
EXOC3L4	6.0557	1.10059	0.381948	2.88151	0.00395775	0.0272647
EYA4	11.3081	2.33007	0.447691	5.20463	1.94389e-07	1.21855e-05
F2R	148.065	1.00678	0.240013	4.19467	2.73264e-05	0.000643225
F5	69.2325	1.55989	0.504237	3.09356	0.00197773	0.0164328
FABP5	517	1.16986	0.222379	5.26065	1.43546e-07	9.39652e-06
FABP5P1	0.891742	1.46798	0.431153	3.40477	0.000662195	0.00742441
FABP5P7	3.20221	1.34043	0.3725	3.59846	0.000320112	0.00431987
FAM105A	92.1674	1.35542	0.243865	5.55805	2.72798e-08	2.30615e-06
FAM138E	0.793956	2.64041	0.710052	3.71862	0.000200317	0.00304113
FAM159A	7.23863	1.17859	0.308567	3.81956	0.000133691	0.00223483
FAM163A	31.4699	1.65055	0.399376	4.13282	3.58332e-05	0.000794183
FAM217A	2.33821	1.37477	0.421044	3.26514	0.00109412	0.0106507
FAM225A	3.7008	2.30548	0.446105	5.16802	2.36581e-07	1.42856e-05
FAM225B	1.23601	1.51341	0.457655	3.30688	0.000943415	0.00963208
FAM26F	90.0053	2.47031	0.359993	6.86211	6.78488e-12	1.9303e-09
FAM43B	42.8648	1.83971	0.443049	4.15238	3.29039e-05	0.000743176
FAM46C	76.8896	1.17949	0.282372	4.17708	2.95271e-05	0.000682191
FAM49B	1619.69	1.1561	0.180317	6.41148	1.44112e-10	2.58423e-08
FAM72C	2.51352	1.32736	0.332781	3.98867	6.64439e-05	0.00129509
FAM87A	7.8182	1.54793	0.48918	3.16433	0.0015544	0.0138279
FASLG	21.8435	3.4885	0.471835	7.39346	1.43055e-13	6.6136e-11
FCER1G	735.468	1.12839	0.244463	4.61577	3.91646e-06	0.000136423
FCER2	7.21265	1.47825	0.373829	3.95435	7.67429e-05	0.00145369
FCGR1A	63.4199	1.85788	0.306277	6.06601	1.31125e-09	1.76051e-07
FCGR1B	11.033	1.7762	0.329885	5.38428	7.27332e-08	5.27458e-06
FCGR1C	3.50501	2.20106	0.432623	5.08772	3.62401e-07	1.98202e-05
FCGR3A	605.787	2.37857	0.368391	6.45664	1.07051e-10	2.03041e-08
FCRL1	4.47587	4.7674	0.82462	5.78132	7.41164e-09	7.4845e-07
FCRL2	3.23659	3.08742	0.564179	5.47241	4.43947e-08	3.43861e-06
FCRL3	27.8464	4.76064	0.527535	9.02431	1.80838e-19	1.07013e-15
FCRL5	4.75612	3.3408	0.817337	4.08742	4.36189e-05	0.000934538
FCRL6	12.3273	2.18762	0.359978	6.0771	1.22379e-09	1.66864e-07
FDX1P1	0.946121	1.41839	0.432747	3.27764	0.00104677	0.0103055
FFAR3	39.5613	1.42806	0.433965	3.29072	0.000999298	0.0100024
FGD2	128.513	1.41396	0.24984	5.65944	1.5187e-08	1.41408e-06
FGF12	45.1232	2.24174	0.332236	6.74745	1.50469e-11	3.5334e-09
FGF5	2.0904	3.13231	0.838303	3.73648	0.000186612	0.00287877
FGF9	886.674	1.15995	0.391508	2.96278	0.0030487	0.0225118
FGL2	286.962	2.23428	0.293047	7.6243	2.45363e-14	1.54464e-11
FGR	86.877	1.15625	0.292551	3.95229	7.74061e-05	0.00146438
FIBCD1	243.674	1.49292	0.428054	3.4877	0.000487196	0.00591987
FLI1	173.204	1.06904	0.190493	5.61199	2.00015e-08	1.77187e-06
FLT3	4.11828	1.76621	0.421682	4.18848	2.8083e-05	0.000656855
FMO3	63.9654	1.05956	0.315557	3.35774	0.000785817	0.00843335
FOXA1	2.36594	2.21401	0.641919	3.44906	0.000562549	0.00657633
FOXD1	47.8682	1.17883	0.441531	2.66987	0.0075881	0.0433849
FOXF1	24.8864	1.40192	0.323919	4.32798	1.50485e-05	0.000397194
FOXG1	1.89596	1.85333	0.580589	3.19215	0.00141218	0.0128604
FOXL2	25.5505	1.11951	0.335064	3.34119	0.000834196	0.00880478
FOXL2NB	4.31571	1.28106	0.433632	2.95425	0.00313427	0.0230116
FOXP3	58.853	1.00045	0.248792	4.02122	5.78976e-05	0.00116248
FPR2	1.58929	1.57103	0.43152	3.64069	0.000271905	0.00385673
FPR3	192.429	1.15823	0.273487	4.23505	2.28501e-05	0.000554326
FRMD4B	280.013	1.06708	0.252326	4.22895	2.3478e-05	0.00056523
FRMD5	22.432	1.90793	0.456407	4.18032	2.91105e-05	0.000674487
FSTL5	25.2287	1.93276	0.536938	3.59959	0.000318714	0.00431189
FTH1P22	3.12411	3.96058	0.661651	5.9859	2.15191e-09	2.69791e-07
FUT7	4.80143	1.98796	0.478343	4.15593	3.23968e-05	0.000735855
FXYD2	8.2643	1.76029	0.387893	4.53807	5.6771e-06	0.000184384
GAB3	63.6337	1.07933	0.206014	5.23912	1.61344e-07	1.04005e-05
GABBR2	37.8478	1.14719	0.253809	4.51989	6.1871e-06	0.000196631
GABRA5	192.577	1.45059	0.528794	2.74321	0.00608417	0.0371709
GABRD	70.6395	1.06112	0.323202	3.28315	0.00102653	0.010182
GABRE	25.7786	1.39389	0.321545	4.33497	1.45778e-05	0.000387188
GABRR2	4.87227	1.22249	0.379766	3.21906	0.0012861	0.0120227
GAD1	11.9749	2.10079	0.355235	5.9138	3.34306e-09	3.80441e-07
GAS6-AS1	258.144	1.43087	0.445524	3.21166	0.00131971	0.0122406
GATA3	24.6657	1.23132	0.32558	3.78194	0.000155612	0.00250776
GATA6	17.8787	1.67067	0.319895	5.22256	1.76466e-07	1.11566e-05
GBP1	691.334	4.01866	0.413355	9.72206	2.42816e-22	3.59222e-18
GBP1P1	59.8974	3.91705	0.480306	8.15533	3.48238e-16	4.29319e-13
GBP2	1122.18	3.17771	0.396207	8.02034	1.05455e-15	1.04858e-12
GBP3	126.936	2.14472	0.376184	5.70126	1.18924e-08	1.13875e-06
GBP4	556.223	2.48638	0.326023	7.62638	2.41434e-14	1.54464e-11
GBP5	190.239	3.70225	0.416683	8.88504	6.38982e-19	2.70089e-15
GBP6	1.72053	2.56126	0.639976	4.00212	6.27774e-05	0.00123583
GBP7	15.3899	2.50066	0.664062	3.76569	0.000166087	0.00263354
GCH1	99.9646	1.18477	0.206679	5.73241	9.90154e-09	9.63706e-07
GCNT3	3.1414	1.95051	0.501175	3.89187	9.94748e-05	0.00177952
GCNT4	12.351	1.85116	0.374904	4.93768	7.9058e-07	3.69537e-05
GCSAM	10.232	2.36331	0.36062	6.55345	5.62239e-11	1.15525e-08
GDF7	93.0444	1.35164	0.434912	3.10786	0.0018845	0.0158675
GEM	400.408	1.88774	0.318195	5.93265	2.98085e-09	3.47234e-07
GFI1	18.9727	2.5302	0.37645	6.7212	1.80236e-11	4.04001e-09
GGT1	328.836	1.6012	0.327417	4.89038	1.00641e-06	4.47784e-05
GIMAP4	341.634	1.3471	0.223955	6.01505	1.79826e-09	2.30995e-07
GIMAP6	215.732	1.07829	0.214218	5.03361	4.81331e-07	2.52334e-05
GIMAP7	104.868	1.75715	0.268789	6.53729	6.2642e-11	1.26949e-08
GJA5	61.8442	1.08124	0.290157	3.7264	0.000194232	0.0029654
GK-AS1	3.60583	1.02414	0.385271	2.65823	0.00785512	0.0443714
GLI2	56.5979	1.00694	0.298978	3.36795	0.000757288	0.00819555
GLIPR1	67.1524	1.06416	0.207919	5.11813	3.08585e-07	1.75892e-05
GLRA2	2.03157	1.90834	0.610064	3.1281	0.00175942	0.015115
GMFG	181.601	1.33917	0.210592	6.35909	2.02948e-10	3.49118e-08
GNGT2	26.3394	1.4844	0.265785	5.58495	2.33764e-08	2.01065e-06
GPC4	145.57	1.3476	0.311785	4.32221	1.54477e-05	0.000404484
GPR12	1.6085	2.09007	0.669064	3.12387	0.00178489	0.015259
GPR132	37.0354	1.15852	0.283979	4.07958	4.51163e-05	0.000958982
GPR137C	19.0734	1.05853	0.270236	3.91706	8.96348e-05	0.00163704
GPR141	3.86996	1.45886	0.352656	4.13679	3.52197e-05	0.000786477
GPR15	3.1811	3.74178	0.786465	4.75773	1.95784e-06	7.72381e-05
GPR162	95.4646	1.00335	0.263406	3.80916	0.000139442	0.00230699
GPR171	8.62035	3.21142	0.481035	6.67605	2.4546e-11	5.3402e-09
GPR174	6.39187	3.75994	0.613665	6.12702	8.95418e-10	1.2616e-07
GPR179	11.2553	1.39516	0.384053	3.63273	0.000280435	0.00394743
GPR18	11.0698	2.81696	0.420892	6.69284	2.18887e-11	4.83315e-09
GPR183	35.1213	1.23485	0.266515	4.63333	3.59836e-06	0.00012766
GPR20	5.19757	1.37447	0.342433	4.01384	5.97389e-05	0.00119268
GPR31	0.480746	2.12854	0.686947	3.09854	0.00194474	0.0162224
GPR34	62.8148	1.00839	0.265362	3.80005	0.000144669	0.00237408
GPR42	4.07726	1.95978	0.460627	4.25459	2.0943e-05	0.000516385
GPR55	8.89139	2.69413	0.432296	6.23215	4.60068e-10	6.875e-08
GPR63	15.3207	1.11678	0.341871	3.26666	0.00108826	0.0106164
GPR65	27.5384	1.67803	0.290942	5.76759	8.04152e-09	8.06551e-07
GPR68	31.7217	1.20616	0.267151	4.5149	6.33459e-06	0.000199878
GPR82	9.58318	1.1319	0.321774	3.5177	0.00043531	0.00542999
GPX2	3.97205	1.05371	0.384755	2.73864	0.0061693	0.0375437
GRAP2	35.9528	1.69445	0.312929	5.4148	6.13579e-08	4.58449e-06
GREB1L	24.9133	1.83912	0.399023	4.60905	4.0452e-06	0.000140316
GREM1	13.1606	1.87083	0.405205	4.61701	3.89312e-06	0.000135997
GRIA3	3.97948	1.28644	0.424311	3.03184	0.0024307	0.0191022
GRID1-AS1	2.46247	1.4074	0.510936	2.75456	0.00587715	0.0363717
GRIK1	11.5685	1.17824	0.40729	2.89288	0.00381724	0.0265877
GRIK1-AS1	2.82547	1.90264	0.589864	3.22555	0.00125732	0.01181
GRIN1	10.9049	1.23909	0.432908	2.86224	0.00420662	0.0284818
GRIN2A	224.422	1.78545	0.496726	3.59444	0.00032509	0.00436969
GRM7	1.09334	2.132	0.729993	2.92057	0.00349386	0.0249039
GSDMC	1.10013	1.78733	0.487993	3.66262	0.000249653	0.0036131
GSG1	7.44414	1.11824	0.405702	2.75632	0.00584565	0.0362071
GTSF1	4.05025	1.77211	0.389012	4.55542	5.22806e-06	0.000173029
GUCY1A2	40.2465	1.00767	0.261313	3.85617	0.000115179	0.00198828
GVINP1	36.7467	1.35109	0.376348	3.59001	0.000330667	0.00442305
GZMA	95.2594	3.10926	0.387802	8.01764	1.07794e-15	1.04858e-12
GZMB	39.9223	2.30947	0.361809	6.3831	1.73534e-10	3.05627e-08
GZMH	47.0669	2.0161	0.347696	5.79846	6.69258e-09	6.97254e-07
GZMK	96.9792	3.7156	0.46365	8.01382	1.11203e-15	1.04858e-12
HAP1	40.5418	1.16407	0.395452	2.94363	0.00324386	0.0235319
HAVCR2	169.676	1.4059	0.235419	5.97193	2.34468e-09	2.86671e-07
HCG4P11	5.3107	2.60601	0.493774	5.27774	1.30784e-07	8.73507e-06
HCG4P7	157.432	1.165	0.345647	3.37051	0.000750304	0.00812889
HCK	273.62	1.13105	0.227234	4.97745	6.44275e-07	3.19346e-05
HCLS1	586.876	1.12781	0.263021	4.28791	1.80365e-05	0.000455345
HCP5	1313.78	2.63659	0.389878	6.7626	1.35535e-11	3.23404e-09
HDAC1P2	0.523843	1.60364	0.564277	2.84194	0.00448398	0.0297804
HEATR9	0.884869	1.8168	0.608456	2.98591	0.00282737	0.0213572
HECW1	12.246	1.89863	0.560376	3.38814	0.000703692	0.00775559
HEY1	257.609	1.19277	0.276846	4.30841	1.64431e-05	0.000425649
HIPK1-AS1	4.56068	1.2194	0.442952	2.75288	0.00590726	0.0364851
HIST1H2BC	45.8539	1.02669	0.330295	3.1084	0.00188102	0.0158473
HK3	55.0061	1.24275	0.255006	4.8734	1.09696e-06	4.78008e-05
HLA-DMA	1881.51	1.11243	0.22654	4.91051	9.08418e-07	4.16072e-05
HLA-DMB	576.966	1.57312	0.2563	6.13782	8.36641e-10	1.19264e-07
HLA-DOA	380.698	1.92781	0.30356	6.35067	2.14376e-10	3.66645e-08
HLA-DOB	22.2087	2.72942	0.368962	7.39757	1.38696e-13	6.51388e-11
HLA-DPA1	5147.56	1.64285	0.276085	5.95054	2.67261e-09	3.2015e-07
HLA-DPB1	5728.6	1.22593	0.239284	5.12331	3.0021e-07	1.72814e-05
HLA-DPB2	23.3932	1.23986	0.401157	3.09071	0.00199676	0.0165584
HLA-DQA1	1785.1	2.05907	0.329593	6.24732	4.17557e-10	6.36839e-08
HLA-DQA2	399.999	2.21653	0.477381	4.64311	3.4321e-06	0.000122496
HLA-DQB1	2247.39	2.08073	0.319647	6.50946	7.54203e-11	1.50779e-08
HLA-DQB1-AS1	9.03746	2.31094	0.417883	5.5301	3.20048e-08	2.65318e-06
HLA-DQB2	268.119	2.021	0.419378	4.81903	1.44255e-06	5.97791e-05
HLA-DRB1	6573.82	1.81621	0.298333	6.08787	1.14423e-09	1.57468e-07
HLA-DRB5	2661.83	2.24051	0.329424	6.8013	1.03679e-11	2.62193e-09
HLA-DRB6	464.146	1.72812	0.375623	4.60068	4.21107e-06	0.000145049
HLA-DRB9	2.40918	1.71259	0.518366	3.30382	0.000953778	0.00970578
HLA-F	3171.14	2.011	0.282406	7.12095	1.07186e-12	3.96429e-10
HLA-S	2.27029	1.19506	0.406804	2.93768	0.00330674	0.0238779
HMGB1P3	2.01356	1.14148	0.408292	2.79575	0.00517791	0.0331324
HMOX1	1381.8	1.06531	0.242739	4.3887	1.14031e-05	0.000319431
HNRNPA1P21	4.31947	1.50351	0.353711	4.25069	2.13114e-05	0.000522261
HOTAIRM1	8.4474	2.95369	0.338539	8.72482	2.66608e-18	8.76488e-15
HOXA1	3.16335	3.18898	0.535583	5.95422	2.61312e-09	3.1558e-07
HOXA10	15.9908	2.08257	0.593808	3.50714	0.000452944	0.00558638
HOXA13	11.0581	2.74944	0.536433	5.12542	2.96877e-07	1.71562e-05
HOXB-AS1	1.97391	1.61388	0.451115	3.57754	0.000346849	0.00456927
HOXB13	22.2457	2.88055	0.921183	3.12701	0.00176592	0.0151484
HOXB2	9.55747	1.74481	0.350273	4.98129	6.3163e-07	3.14624e-05
HOXB4	8.04436	3.4584	0.448065	7.71852	1.17685e-14	8.49282e-12
HOXB6	4.42507	1.48182	0.371624	3.98742	6.67945e-05	0.00130106
HOXB7	19.4097	1.89941	0.438952	4.32716	1.51046e-05	0.00039832
HOXC10	1.92885	2.74711	0.810947	3.38753	0.000705241	0.00776578
HOXC13	2.78842	3.61956	0.737908	4.90517	9.33466e-07	4.26884e-05
HOXC6	19.7542	3.77647	0.77001	4.90444	9.36958e-07	4.27119e-05
HOXC9	27.7726	2.41835	0.825825	2.92841	0.00340699	0.024426
HOXD9	4.87128	2.81533	0.632506	4.45107	8.54446e-06	0.000254596
HPCA	15.0011	1.39994	0.325726	4.29791	1.72412e-05	0.00044053
HPSE	123.265	1.76424	0.267857	6.5865	4.50313e-11	9.51705e-09
HRH4	2.12497	1.23235	0.295686	4.16777	3.07592e-05	0.000706313
HRSP12	513.324	1.01073	0.16537	6.11195	9.84237e-10	1.37366e-07
HS3ST3B1	23.7412	1.53698	0.273692	5.61574	1.95726e-08	1.74959e-06
HS6ST2	18.3556	1.20808	0.428488	2.81941	0.00481117	0.0313899
HSF5	0.880573	1.57948	0.55858	2.82767	0.00468877	0.0307881
HSH2D	17.6684	1.75412	0.437291	4.01132	6.03792e-05	0.0012006
HSPB8	1415.05	1.27709	0.373477	3.41945	0.000627486	0.0071353
HTATIP2	613.982	1.36643	0.252865	5.40378	6.52498e-08	4.81449e-06
HTR1F	1.23089	2.23092	0.703933	3.16922	0.00152848	0.0136713
HTR2B	2275.5	3.06309	0.530321	5.77592	7.65317e-09	7.70211e-07
HTRA1	4153.67	1.00976	0.280143	3.60444	0.000312832	0.00426087
IBSP	7.23718	3.68251	0.767082	4.80068	1.58131e-06	6.48928e-05
ICAM3	19.1503	2.33234	0.390078	5.97917	2.24277e-09	2.77653e-07
ICOS	9.35871	3.87379	0.540575	7.16605	7.7192e-13	2.89109e-10
IDO1	106.639	4.22939	0.534583	7.91155	2.54196e-15	2.08921e-12
IDO2	0.757876	2.60282	0.736569	3.5337	0.000409779	0.00520367
IFI44L	203.138	1.19087	0.346148	3.44035	0.000580961	0.00675421
IFNG	6.42692	4.46013	0.649334	6.86878	6.47555e-12	1.86018e-09
IFNG-AS1	0.640504	2.33954	0.751715	3.11227	0.00185656	0.0157125
IGF1	12.0155	1.24562	0.257231	4.84241	1.28276e-06	5.4768e-05
IGF2BP3	4.50148	1.74038	0.400089	4.34999	1.36142e-05	0.000366198
IGFBP2	3554.87	1.18659	0.286993	4.13458	3.55608e-05	0.000790515
IGHA2	277.146	3.5435	0.70663	5.01464	5.31321e-07	2.72929e-05
IGHG2	195.244	1.79627	0.585516	3.06784	0.00215612	0.0175117
IGHG4	33.9911	1.72169	0.571697	3.01153	0.00259932	0.0200754
IGHJ3	0.923236	2.67297	0.946168	2.82505	0.00472729	0.0309724
IGHV1-69	27.5588	6.61995	1.16974	5.65931	1.51979e-08	1.41408e-06
IGHV1-69-2	27.385	4.24346	0.952194	4.4565	8.33078e-06	0.000250245
IGHV3-11	20.4855	3.28902	0.868826	3.7856	0.000153341	0.00248062
IGHV3-13	6.57798	4.02182	1.16082	3.46464	0.000530941	0.00628883
IGHV3-15	13.4585	2.21795	0.702098	3.15903	0.00158294	0.0139934
IGHV3-20	1.37428	3.43358	1.09667	3.13092	0.00174259	0.0150109
IGHV3-21	42.5047	4.64519	0.846216	5.48936	4.03392e-08	3.19133e-06
IGHV3-23	66.3633	2.76978	0.713339	3.88283	0.000103246	0.0018227
IGHV3-30	17.8684	3.04905	0.784927	3.88451	0.000102539	0.00181889
IGHV3-43	1.69111	2.9762	1.07582	2.76644	0.00566711	0.0354201
IGHV3-48	2.61692	2.74427	1.04646	2.62244	0.00873019	0.0480217
IGHV3-53	7.04776	3.79	1.01232	3.74388	0.000181197	0.00281973
IGHV3-66	3.88623	3.0586	1.06515	2.87151	0.00408517	0.0278507
IGHV3-7	2.29711	2.79383	0.907862	3.07737	0.00208833	0.0171463
IGHV3-72	2.37271	2.25765	0.845683	2.66962	0.00759382	0.0433866
IGHV3-74	24.6895	3.68435	0.901496	4.08693	4.37127e-05	0.000935869
IGHV4-31	10.6219	3.71235	0.866405	4.28477	1.82926e-05	0.000461024
IGHV4-39	95.1804	3.68075	0.859399	4.28293	1.84445e-05	0.00046309
IGHV4-4	8.31805	5.3221	1.13537	4.68754	2.7651e-06	0.000102012
IGHV4-55	1.74111	3.045	0.973071	3.12927	0.00175242	0.0150772
IGHV4-59	45.5761	3.26125	0.859071	3.79625	0.000146899	0.00239975
IGHV5-51	20.2883	2.62375	0.775919	3.38147	0.00072099	0.00789806
IGKV1-12	1.51963	2.65526	1.00704	2.63669	0.00837201	0.046536
IGKV1-16	8.3578	3.02862	0.937298	3.23123	0.00123259	0.0116443
IGKV1-17	20.3027	3.79096	0.977779	3.87711	0.000105705	0.00185497
IGKV1-5	227.8	4.05392	0.83887	4.8326	1.34764e-06	5.65589e-05
IGKV1-6	16.4579	4.41439	0.908811	4.85733	1.18978e-06	5.12605e-05
IGKV1-8	1.74239	3.41785	1.05931	3.2265	0.00125316	0.0117859
IGKV1D-16	1.5297	3.58572	1.16524	3.07724	0.00208927	0.0171463
IGKV3-11	201.414	4.13456	0.742634	5.56743	2.58523e-08	2.19804e-06
IGKV3-15	24.2923	3.12513	0.89399	3.49571	0.000472798	0.00578229
IGKV3-20	99.2995	3.37354	0.769069	4.38652	1.15179e-05	0.000321805
IGKV3-7	1.37676	3.60128	1.20586	2.98649	0.00282198	0.0213274
IGKV3D-11	1.1468	2.91953	1.11128	2.62719	0.00860938	0.0475123
IGKV3OR2-268	0.921325	2.81432	1.07681	2.61357	0.00896008	0.0488773
IGKV4-1	136.769	4.30843	0.683997	6.29891	2.99744e-10	4.84635e-08
IGLC3	213.229	4.96777	0.707911	7.0175	2.25866e-12	7.34387e-10
IGLL5	100.605	3.48399	0.767787	4.5377	5.6871e-06	0.000184506
IGLV1-41	2.18207	2.75812	0.929904	2.96602	0.00301677	0.0223598
IGLV1-47	57.9727	4.1287	0.913424	4.52003	6.18313e-06	0.000196631
IGLV1-51	58.6696	2.05546	0.489777	4.19674	2.7079e-05	0.000638417
IGLV2-14	48.5381	2.51938	0.722918	3.48502	0.000492106	0.00596495
IGLV2-23	79.8562	3.86129	0.760438	5.07772	3.81984e-07	2.0776e-05
IGLV3-1	78.5165	5.75156	0.997657	5.76506	8.16272e-09	8.13193e-07
IGLV3-25	17.6961	2.82075	0.892535	3.16037	0.00157567	0.0139641
IGLV6-57	47.5929	4.32102	0.950119	4.54787	5.41905e-06	0.000177366
IGSF6	214.689	1.65431	0.242319	6.827	8.67062e-12	2.28256e-09
IKZF1	136.248	1.71413	0.27358	6.26557	3.71466e-10	5.79474e-08
IKZF3	149.411	2.98653	0.399956	7.46715	8.19525e-14	3.9751e-11
IL10	6.03722	1.39496	0.309472	4.50755	6.55803e-06	0.000205513
IL10RA	352.999	1.47962	0.258809	5.71704	1.08395e-08	1.05154e-06
IL12RB1	128.278	2.10925	0.334093	6.31337	2.73027e-10	4.51302e-08
IL15	22.1425	1.48578	0.313747	4.73559	2.18415e-06	8.42562e-05
IL15RA	61.1109	1.35192	0.246981	5.47379	4.40523e-08	3.42105e-06
IL18	54.941	1.61429	0.281534	5.73389	9.81505e-09	9.58442e-07
IL18BP	668.155	2.02312	0.280145	7.22169	5.13458e-13	2.053e-10
IL18RAP	3.91573	1.52338	0.43254	3.52195	0.000428391	0.00537493
IL1R2	20.6427	1.82935	0.288719	6.33609	2.35666e-10	3.99749e-08
IL21R	32.9113	2.78004	0.4044	6.87448	6.22154e-12	1.80473e-09
IL27	4.16266	1.64901	0.411643	4.00591	6.1778e-05	0.00122155
IL2RA	30.3216	1.24255	0.340334	3.65098	0.000261245	0.00373597
IL2RB	204.07	2.05562	0.324456	6.33559	2.36434e-10	3.99749e-08
IL2RG	339.039	2.36361	0.345232	6.84643	7.57151e-12	2.10759e-09
IL31RA	0.487401	1.80638	0.690001	2.61793	0.00884645	0.048472
IL32	364.718	2.03588	0.325409	6.2564	3.93976e-10	6.07134e-08
IL6	5.39572	1.39047	0.376323	3.69488	0.000219992	0.0032742
IL7	13.7673	1.29699	0.342139	3.79082	0.000150151	0.00243835
IL7R	27.6165	1.63748	0.418052	3.91692	8.96864e-05	0.00163704
IL9R	2.45479	1.78379	0.448179	3.98008	6.8893e-05	0.00133403
IMPA1	719.133	1.31336	0.218011	6.02429	1.69858e-09	2.20428e-07
INA	20.8174	1.40807	0.38488	3.65846	0.000253733	0.00365343
IPCEF1	14.9576	2.06613	0.322478	6.40704	1.48374e-10	2.64462e-08
IQGAP2	200.695	1.2753	0.250512	5.09077	3.56619e-07	1.96619e-05
IRF1	1081.76	2.51872	0.304302	8.27705	1.26269e-16	1.85338e-13
IRF8	179.326	1.9621	0.28081	6.98728	2.80271e-12	8.82199e-10
IRF9	119.299	1.29492	0.235089	5.50821	3.62492e-08	2.93847e-06
IRX2	16.1922	2.00989	0.381671	5.26602	1.39415e-07	9.18714e-06
ISG20	404.689	2.3	0.307405	7.48197	7.32158e-14	3.61052e-11
ISL1	2.8198	2.10296	0.690104	3.0473	0.00230905	0.0184213
ISL2	1.13437	2.34241	0.654503	3.5789	0.000345037	0.00455757
ISM1	264.288	2.69414	0.433656	6.21263	5.21065e-10	7.70863e-08
ITGA4	63.27	2.07311	0.38418	5.39619	6.80724e-08	4.9609e-06
ITGAD	31.5221	1.02285	0.384045	2.66336	0.00773642	0.0439526
ITGAL	348.042	2.23859	0.356609	6.27745	3.44181e-10	5.41683e-08
ITGAX	651.396	1.80409	0.245667	7.34362	2.07889e-13	9.31971e-11
ITGB2-AS1	14.0926	2.56477	0.363746	7.05099	1.77644e-12	5.97286e-10
ITGB3	17.3191	1.20978	0.257933	4.69028	2.72826e-06	0.000100905
ITIH6	106.042	1.42071	0.496698	2.8603	0.00423236	0.0286233
ITK	30.1866	2.68767	0.425938	6.31001	2.79017e-10	4.58642e-08
ITPR2	1238.45	1.53389	0.309807	4.95114	7.3781e-07	3.5097e-05
JAKMIP1	24.6934	2.51047	0.450148	5.57699	2.44716e-08	2.08664e-06
JAKMIP2	7.38745	1.36074	0.415232	3.27705	0.00104897	0.0103113
JCHAIN	902.717	5.99593	0.674521	8.88918	6.15641e-19	2.70089e-15
JPH1	203.43	1.17161	0.322398	3.63403	0.000279023	0.00393253
KB-1507C5.3	1.41636	1.17994	0.419501	2.81272	0.0049124	0.0318466
KB-1742H10.3	12.2627	1.75272	0.338518	5.17764	2.24711e-07	1.36806e-05
KB-431C1.5	16.6571	1.09752	0.334179	3.28423	0.00102261	0.0101561
KCNA3	6.76281	2.09848	0.458525	4.5766	4.72592e-06	0.00015926
KCNE1	3.0114	1.17845	0.315921	3.7302	0.000191327	0.00293012
KCNF1	44.5367	1.62661	0.299866	5.42445	5.81318e-08	4.36549e-06
KCNH6	4.83061	2.09348	0.477523	4.38403	1.16503e-05	0.00032489
KCNJ10	47.1874	1.23095	0.385717	3.19134	0.00141616	0.0128822
KCNJ6	9.68948	1.87225	0.61983	3.02058	0.00252291	0.0196068
KCNK1	113.44	1.47296	0.433766	3.39575	0.00068442	0.00759873
KCNK3	9.99726	1.58669	0.438782	3.61613	0.000299044	0.00412466
KIAA0125	6.63119	3.91812	0.73092	5.36053	8.29783e-08	5.87359e-06
KIAA0196-AS1	10.1041	1.8009	0.371602	4.84631	1.25778e-06	5.38568e-05
KIAA0319	5.07499	1.35165	0.299917	4.50676	6.58254e-06	0.000205882
KIF17	1240.45	1.82437	0.432777	4.2155	2.49222e-05	0.000597083
KIF5C	76.5978	1.12622	0.346411	3.25112	0.0011495	0.011039
KIR2DL3	1.09701	2.39085	0.548342	4.36015	1.29974e-05	0.000352814
KIR2DL4	5.88408	1.70589	0.479764	3.55569	0.00037699	0.00486559
KIR2DS4	2.10425	2.05969	0.587376	3.50659	0.000453887	0.00559567
KIR3DL2	0.950337	2.61816	0.628204	4.16769	3.07705e-05	0.000706313
KLHDC7B	28.5406	1.52326	0.39675	3.83936	0.000123358	0.00209404
KLHL6	77.452	1.06201	0.309615	3.43009	0.000603387	0.0069494
KLRC1	2.02046	2.33331	0.631573	3.69444	0.000220371	0.0032749
KLRC4-KLRK1	0.941977	2.54438	0.696122	3.65507	0.000257108	0.00369466
KLRD1	19.2254	1.68327	0.359251	4.68549	2.79293e-06	0.000102783
KLRK1	3.32502	3.91182	0.621465	6.29451	3.08368e-10	4.93189e-08
KMO	17.5407	1.25724	0.265281	4.73929	2.14467e-06	8.30584e-05
KRT6A	9.4476	3.28819	1.20912	2.71948	0.00653838	0.0391405
KRTAP19-1	4.73122	1.59949	0.430132	3.71861	0.000200323	0.00304113
L3MBTL4-AS1	24.2327	1.56036	0.291962	5.3444	9.07155e-08	6.31551e-06
LA16c-329F2.2	0.696254	1.2976	0.474078	2.73711	0.00619814	0.037634
LA16c-390H2.4	1.96095	1.32922	0.412106	3.22544	0.00125781	0.0118109
LACTB2-AS1	5.08408	1.14278	0.251261	4.54819	5.41091e-06	0.000177366
LAG3	273.158	3.50441	0.434928	8.05745	7.79028e-16	8.2321e-13
LAIR1	339.383	1.06864	0.233132	4.58383	4.56539e-06	0.000155265
LAIR2	1.99858	1.5062	0.552837	2.72449	0.0064401	0.0387532
LAMA1	310.756	2.13876	0.27917	7.66115	1.84276e-14	1.23917e-11
LAMB3	52.5173	1.22687	0.30419	4.03325	5.50116e-05	0.00111868
LAMB4	1.41665	1.05175	0.386643	2.72022	0.00652387	0.0391062
LAP3	2233.33	1.00761	0.199578	5.0487	4.44825e-07	2.35026e-05
LAPTM5	2248.29	1.52358	0.25557	5.96149	2.49944e-09	3.04335e-07
LAT2	123.14	1.01542	0.20443	4.96709	6.79646e-07	3.33422e-05
LAX1	14.8314	3.57491	0.469628	7.6122	2.6946e-14	1.6271e-11
LBX1	1.81533	2.2704	0.688194	3.29907	0.00097004	0.0098125
LCE2A	8.79009	1.52615	0.468757	3.25573	0.001131	0.0109004
LCK	114.099	2.78331	0.396848	7.01355	2.32347e-12	7.43818e-10
LCP1	878.979	1.82779	0.294379	6.20896	5.33376e-10	7.85151e-08
LCP2	278.802	1.67433	0.254485	6.57929	4.72714e-11	9.78522e-09
LGALS17A	20.9215	4.09373	0.633021	6.46697	9.9986e-11	1.93359e-08
LGALS7B	0.647982	1.55779	0.548715	2.83898	0.00452573	0.0300241
LHX1	0.716999	1.76992	0.612316	2.89054	0.0038458	0.026732
LIF	46.3683	1.02251	0.329222	3.10583	0.00189744	0.0159312
LILRA4	30.794	1.85431	0.415051	4.46766	7.908e-06	0.000241218
LILRA6	33.2826	1.25723	0.255692	4.91697	8.78936e-07	4.03819e-05
LILRB1	51.7197	1.5479	0.281621	5.49639	3.87634e-08	3.09146e-06
LILRB2	102.171	1.23257	0.252332	4.88473	1.03569e-06	4.58056e-05
LILRB5	262.347	1.25433	0.241579	5.19222	2.07798e-07	1.28086e-05
LILRP2	0.644578	2.37839	0.816902	2.91148	0.00359722	0.0254628
LINC00152	109.862	2.41009	0.315359	7.64237	2.13253e-14	1.40216e-11
LINC00158	1.69475	3.04176	0.589623	5.15883	2.48498e-07	1.48237e-05
LINC00239	0.844831	1.66683	0.576979	2.88889	0.00386599	0.0268199
LINC00384	0.568414	1.55032	0.552868	2.80414	0.00504509	0.0325074
LINC00403	202.858	1.66943	0.393841	4.23884	2.24674e-05	0.000545784
LINC00404	92.834	1.64212	0.396087	4.14586	3.38536e-05	0.000758259
LINC00520	12.0946	2.23223	0.579634	3.85109	0.000117591	0.00202049
LINC00528	4.78911	2.27467	0.332757	6.83584	8.15234e-12	2.17308e-09
LINC00861	8.78685	2.73234	0.48818	5.59698	2.18112e-08	1.89809e-06
LINC00862	7.05171	1.33195	0.39997	3.33013	0.00086807	0.00907577
LINC00892	1.51253	2.26356	0.659772	3.43081	0.000601771	0.00693679
LINC00930	15.3649	1.68384	0.378721	4.44613	8.74318e-06	0.000259472
LINC00944	1.30598	2.85564	0.592035	4.82343	1.41109e-06	5.86395e-05
LINC00968	2.66254	2.61256	0.507362	5.1493	2.61456e-07	1.54411e-05
LINC00989	1.43541	1.26519	0.372703	3.39463	0.000687211	0.00762107
LINC00996	9.06678	1.39345	0.295745	4.71165	2.45714e-06	9.29693e-05
LINC01010	4.68088	1.90858	0.685163	2.78559	0.00534299	0.0339391
LINC01044	2.2219	1.39856	0.37128	3.76687	0.000165307	0.0026268
LINC01169	0.78714	2.63523	0.962938	2.73666	0.0062066	0.0376647
LINC01215	0.954155	2.33966	0.697504	3.35433	0.00079558	0.00851342
LINC01252	27.7211	1.10149	0.33365	3.30135	0.000962222	0.00976421
LINC01270	43.5719	1.32834	0.315726	4.20726	2.58485e-05	0.000614796
LINC01271	5.56926	1.58982	0.347616	4.57349	4.79668e-06	0.000161094
LINC01353	2.22195	1.16922	0.352167	3.32008	0.000899914	0.0093085
LINC01606	5.91525	2.25688	0.519643	4.34314	1.40462e-05	0.00037509
LINC01615	6.04168	2.35391	0.509612	4.61902	3.85557e-06	0.000135004
LINGO3	6.86287	1.77758	0.392493	4.52895	5.92776e-06	0.000190022
LIPM	0.78375	2.241	0.819418	2.73487	0.00624054	0.0378137
LLNLR-470E3.1	3.69037	1.25978	0.37223	3.38441	0.000713326	0.00783176
LRMP	33.9376	1.70819	0.294697	5.79645	6.77344e-09	7.00162e-07
LRP12	366.587	1.13258	0.223606	5.06507	4.08252e-07	2.20025e-05
LRP2BP	151.26	1.04606	0.216846	4.82397	1.40732e-06	5.8565e-05
LRRC52	5.28807	2.34979	0.532015	4.41678	1.00184e-05	0.00028751
LRRC66	3.76036	1.27982	0.414872	3.08486	0.00203647	0.0168228
LRRC69	11.9582	1.46629	0.320141	4.58015	4.64643e-06	0.000156939
LRRCC1	184.335	1.41851	0.339257	4.18122	2.89949e-05	0.000672803
LRRD1	1.33013	1.47106	0.435703	3.3763	0.000734667	0.00800378
LRRTM2	42.1615	1.98993	0.370966	5.36418	8.13167e-08	5.79759e-06
LRTM1	3.94317	3.14281	0.953336	3.29664	0.000978475	0.00986073
LRTM2	2.75999	1.76939	0.566022	3.12601	0.00177197	0.0151749
LST1	170.906	1.23941	0.252726	4.90415	9.38311e-07	4.27119e-05
LTA	9.03082	2.52139	0.423028	5.96034	2.51708e-09	3.05226e-07
LTB	95.4078	2.30714	0.393607	5.86152	4.58653e-09	4.9892e-07
LUZP2	0.633995	1.52335	0.556961	2.73511	0.00623596	0.0378016
LVRN	1.20531	1.08039	0.400741	2.696	0.00701786	0.0411395
LY9	33.4545	2.44222	0.37113	6.5805	4.68877e-11	9.78522e-09
LY96	911.951	1.97361	0.356104	5.54222	2.98654e-08	2.50279e-06
LYG1	9.42351	1.03912	0.298198	3.48465	0.000492787	0.00597076
LYPLA1	1379.65	1.01799	0.22252	4.57483	4.76612e-06	0.00016025
LYZ	876.987	2.68165	0.373549	7.17884	7.0307e-13	2.66698e-10
MAFA	6.55398	1.21278	0.367608	3.29911	0.000969915	0.0098125
MAL2	174.716	2.77288	0.55249	5.01888	5.19726e-07	2.68371e-05
MALL	19.6903	1.73817	0.389719	4.46007	8.19338e-06	0.000247373
MAP1A	862.41	1.16655	0.348175	3.35047	0.000806747	0.00861112
MAP1B	482.893	1.2838	0.272762	4.70668	2.51783e-06	9.46602e-05
MAP2	2057.38	1.13628	0.287449	3.95298	7.71827e-05	0.00146109
2019-03-11	0.735654	1.55616	0.57926	2.68647	0.00722118	0.0419765
MARK2P9	1.26473	1.28728	0.404336	3.18369	0.0014541	0.0131368
MB21D1	56.4857	1.09512	0.254276	4.30682	1.65622e-05	0.000428358
MC5R	1.21019	1.78198	0.573496	3.10722	0.00188856	0.0158921
MCOLN2	99.5925	1.03942	0.248314	4.18589	2.8405e-05	0.000661769
ME1	206.133	1.15154	0.340016	3.38673	0.000707316	0.0077745
MEFV	11.7198	1.31628	0.285651	4.60798	4.06604e-06	0.000140873
MEG3	29.1099	1.40893	0.353078	3.9904	6.59606e-05	0.00128736
MEI1	21.22	1.05501	0.262342	4.02151	5.78267e-05	0.00116235
MEP1A	2.77804	4.09953	0.595442	6.88486	5.78456e-12	1.71153e-09
MFSD2A	37.7833	1.11849	0.275283	4.06307	4.84323e-05	0.0010113
MIAT	47.3259	1.90978	0.38035	5.02111	5.13744e-07	2.66678e-05
MICALCL	0.958398	1.51013	0.494276	3.05523	0.00224889	0.0180963
MILR1	32.1838	1.10001	0.221182	4.97333	6.58123e-07	3.24003e-05
MIR124-2HG	3.15426	2.34376	0.803901	2.91548	0.00355139	0.0251964
MIR155HG	20.9639	2.40201	0.357364	6.72146	1.79912e-11	4.04001e-09
MIR199A1	0.622765	1.82736	0.62251	2.93548	0.00333036	0.0239987
MIR3180-1	2.33527	1.21528	0.355986	3.41385	0.00064051	0.00724692
MIR4435-2HG	221.594	1.62795	0.301363	5.40196	6.59149e-08	4.85147e-06
MIR4655	6.39763	2.23668	0.526414	4.2489	2.14823e-05	0.000524871
MIR5685	0.723382	1.34391	0.50363	2.66845	0.00762022	0.0435013
MMP1	17.9358	1.94087	0.480252	4.04137	5.31408e-05	0.00108812
MMP12	38.7734	6.82039	0.813938	8.3795	5.31531e-17	9.25113e-14
MMP16	32.4335	1.7475	0.380242	4.59575	4.3119e-06	0.000148177
MMP25	40.8627	2.34822	0.325855	7.20632	5.74833e-13	2.26776e-10
MMP9	403.216	2.54525	0.373993	6.8056	1.00631e-11	2.56677e-09
MPEG1	778.995	1.22448	0.246122	4.97509	6.52163e-07	3.2214e-05
MRC2	1153.28	1.1455	0.312339	3.66748	0.000244957	0.00356157
MROH5	3.25398	2.95534	0.573353	5.15449	2.54326e-07	1.50802e-05
MRPL13	934.528	1.0165	0.191627	5.30458	1.12934e-07	7.73493e-06
MRPL40P1	3.41195	1.19308	0.412098	2.89513	0.00379001	0.0264354
MS4A1	8.09326	3.18629	0.61643	5.16894	2.35432e-07	1.42453e-05
MS4A14	17.6743	1.09195	0.287926	3.79245	0.000149168	0.00242639
MS4A4A	244.383	1.07435	0.21736	4.94272	7.70411e-07	3.62692e-05
MS4A4E	5.89585	1.29168	0.341351	3.78403	0.000154309	0.00249138
MS4A6A	473.401	1.43394	0.244143	5.87336	4.27062e-09	4.71641e-07
MS4A7	285.732	1.75828	0.258265	6.80803	9.89431e-12	2.54568e-09
MSR1	167.568	1.35098	0.246496	5.48076	4.23511e-08	3.33267e-06
MSX1	22.3997	1.31433	0.274279	4.79193	1.65182e-06	6.72269e-05
MTBP	165.112	1.02775	0.245334	4.18918	2.7996e-05	0.000655856
MTCL1	163.898	1.0735	0.231445	4.63825	3.51365e-06	0.000124954
MTDH	4181.83	1.06564	0.205596	5.18319	2.18125e-07	1.3307e-05
MTUS2-AS1	1.06204	1.38674	0.389633	3.5591	0.000372129	0.00482285
MUC12	8.63052	1.63389	0.411043	3.97498	7.03854e-05	0.00135552
MYBPC1	1.47266	2.58841	0.801151	3.23086	0.00123418	0.0116556
MYBPC3	1.41761	1.33548	0.3798	3.51628	0.000437634	0.00544751
MYCN	30.0385	1.27765	0.253014	5.04973	4.42443e-07	2.34186e-05
MYCNOS	9.04857	2.59772	0.495176	5.24604	1.554e-07	1.01054e-05
MYCNUT	37.6181	2.21226	0.533399	4.14747	3.36167e-05	0.000755814
MYEOV	455.833	1.9979	0.483216	4.13458	3.55609e-05	0.000790515
MYL4	7.29767	1.60149	0.341258	4.69288	2.69385e-06	9.97566e-05
MYO1G	203.315	1.12897	0.29476	3.83015	0.000128067	0.00215421
MYOM3	2.63801	1.33105	0.498596	2.6696	0.00759427	0.0433866
MYPN	0.995032	1.98686	0.522301	3.80406	0.000142343	0.00234632
MZB1	12.5175	1.60371	0.522247	3.07078	0.00213498	0.0173752
NAMA_1	11.9721	1.0121	0.331409	3.05394	0.00225859	0.0181448
NAPSB	100.122	1.02823	0.353068	2.91228	0.00358802	0.0254038
NAT8B	1.97423	1.65309	0.418024	3.95453	7.66856e-05	0.00145369
NBN	1664.98	1.00581	0.187352	5.36857	7.93626e-08	5.68567e-06
NCF1	99.5246	1.2942	0.294391	4.3962	1.10165e-05	0.000310729
NCF1B	30.1132	1.08698	0.292499	3.71617	0.000202269	0.00306281
NCF1C	65.0634	1.23734	0.301269	4.10709	4.00672e-05	0.000872338
NCF4	214.64	1.0953	0.241765	4.53042	5.88669e-06	0.000189115
NCKAP1L	389.474	1.45608	0.251796	5.78278	7.3476e-09	7.47082e-07
NCR3	4.91456	1.18996	0.364582	3.26392	0.00109883	0.0106842
NCR3LG1	121.767	1.01537	0.280158	3.62429	0.000289757	0.00403072
NEBL	29.4371	1.05436	0.389216	2.70894	0.00674988	0.040078
NEFL	19.139	2.12717	0.522067	4.07451	4.6111e-05	0.000974189
NEURL3	9.22852	1.21236	0.32496	3.73079	0.000190878	0.00292627
NEUROD2	1.65708	1.26961	0.461574	2.75062	0.00594832	0.0366324
NEUROD4	6.13798	2.23767	0.663771	3.37116	0.000748536	0.00811865
NEXN	35.0738	1.49476	0.263634	5.66982	1.42951e-08	1.34701e-06
NFAM1	188.93	1.07712	0.240183	4.48459	7.30543e-06	0.000225865
NFATC2	146.091	1.41897	0.21676	6.5463	5.89814e-11	1.20355e-08
NINJ2	31.774	1.05037	0.233569	4.49703	6.89097e-06	0.000214847
NIPAL4	5.56681	2.39226	0.596787	4.00856	6.10895e-05	0.00121228
NKG7	288.911	2.68204	0.367277	7.30251	2.82448e-13	1.21117e-10
NKX2-2	10.6957	3.28674	0.650022	5.05635	4.27349e-07	2.27418e-05
NKX2-4	71.2545	2.4584	0.52207	4.70895	2.48992e-06	9.38493e-05
NKX3-2	2.54926	1.42065	0.418239	3.39673	0.000681951	0.00757417
NKX6-1	7.95754	2.52317	0.517969	4.87127	1.10882e-06	4.81254e-05
NLRC4	30.8239	1.1631	0.185262	6.27817	3.42576e-10	5.41683e-08
NLRC5	971.786	1.72201	0.26467	6.50625	7.70489e-11	1.53002e-08
NLRP6	16.4226	1.46884	0.304117	4.82984	1.36642e-06	5.71847e-05
NME8	2.27502	1.67537	0.438341	3.82208	0.000132331	0.00221459
NNAT	25.3932	1.21623	0.357424	3.40275	0.000667105	0.00746532
NOD2	40.3127	1.41353	0.289281	4.88636	1.02716e-06	4.55647e-05
NOV	260.866	1.00644	0.288531	3.48815	0.000486382	0.00591251
NOX5	1995.81	1.43508	0.385739	3.72034	0.000198954	0.00302967
NPNT	26.13	1.1088	0.309093	3.58728	0.000334151	0.00445555
NPTX1	163.224	1.77951	0.428788	4.15009	3.3234e-05	0.00074843
NQO1	3067.25	1.4509	0.278947	5.20134	1.97859e-07	1.23248e-05
NR2E1	164.261	1.96332	0.51715	3.79643	0.000146797	0.00239968
NR5A2	9.79135	1.65008	0.282199	5.84721	4.9989e-09	5.39808e-07
NTAN1P2	9.99289	1.15126	0.253886	4.53453	5.77312e-06	0.000186073
NTNG2	71.0201	1.06948	0.272769	3.92081	8.8251e-05	0.00161883
NUGGC	3.93399	3.19634	0.623121	5.12957	2.90402e-07	1.68149e-05
OPN4	4.90656	1.37207	0.389586	3.52186	0.000428533	0.00537493
OPRD1	7.28355	1.10423	0.322384	3.4252	0.000614339	0.00702902
OR2B6	1.36842	1.30822	0.432883	3.0221	0.00251027	0.0195612
OR2I1P	46.0135	4.0526	0.497331	8.14869	3.67885e-16	4.35399e-13
OR4F13P	0.734956	2.14028	0.616726	3.47039	0.000519704	0.00618793
OR51E1	10.2159	1.61542	0.308034	5.2443	1.56877e-07	1.01438e-05
OSR2	11.3062	1.14712	0.428601	2.67644	0.00744096	0.0428167
P2RX1	8.54045	1.42036	0.348435	4.0764	4.57383e-05	0.00097011
P2RX5	10.0321	1.22869	0.39776	3.08904	0.00200806	0.0166195
P2RY1	29.3331	1.00063	0.23654	4.23029	2.33393e-05	0.000562348
P2RY10	9.78589	3.99742	0.546995	7.30797	2.71206e-13	1.18007e-10
P2RY13	51.7832	1.01757	0.265482	3.83292	0.000126631	0.00213369
P2RY6	71.9767	1.20151	0.277833	4.32457	1.52829e-05	0.000401589
PADI1	68.211	1.62618	0.404077	4.02443	5.71136e-05	0.00115271
PADI3	2.42558	2.53658	0.630688	4.02193	5.77234e-05	0.00116185
PAEP	71.3677	2.4891	0.522735	4.76168	1.91986e-06	7.6146e-05
PALM3	6.00922	1.78906	0.360507	4.96263	6.95461e-07	3.35682e-05
PANX2	298.951	1.16325	0.280007	4.15435	3.26207e-05	0.000739301
PAPPA-AS2	1.1676	1.34981	0.476154	2.83481	0.0045853	0.0303038
PARP15	21.0215	1.66999	0.41482	4.02582	5.67774e-05	0.00114749
PARP8	419.608	1.36213	0.289237	4.7094	2.48445e-06	9.38493e-05
PART1	8.4521	2.2068	0.512949	4.30217	1.6913e-05	0.000435907
PARVG	191.559	1.53838	0.259773	5.922	3.18046e-09	3.64206e-07
PATL2	44.5894	1.60976	0.28483	5.65166	1.58903e-08	1.46926e-06
PCAT29	2.65958	2.63298	0.491043	5.36202	8.22947e-08	5.85321e-06
PCDH11X	0.95363	2.4408	0.592278	4.12105	3.77156e-05	0.000832163
PCDH17	49.3871	1.06059	0.268198	3.9545	7.6695e-05	0.00145369
PCED1B	78.6098	1.65152	0.286381	5.76687	8.07551e-09	8.07224e-07
PCED1B-AS1	58.4191	1.49975	0.291321	5.1481	2.63139e-07	1.55095e-05
PCK1	5.66524	1.91434	0.369847	5.17602	2.26668e-07	1.37714e-05
PCP4L1	7.08995	1.36782	0.405619	3.37219	0.000745733	0.00809419
PDCD1	50.2629	3.69662	0.456165	8.10369	5.33164e-16	5.84269e-13
PGR	6.70067	1.97747	0.396819	4.98332	6.2504e-07	3.11867e-05
PHOSPHO1	10.3326	1.03458	0.342134	3.0239	0.0024954	0.019471
PI15	10.7193	1.15324	0.361711	3.18829	0.00143118	0.0129895
PIGR	5.06112	1.77398	0.597889	2.96707	0.00300657	0.022301
PIK3C2A	2506.82	1.25575	0.250588	5.01122	5.40849e-07	2.75908e-05
PIK3CG	24.9793	1.56531	0.303039	5.16537	2.39961e-07	1.44308e-05
PKD2L1	16.6399	1.51085	0.384802	3.92631	8.62594e-05	0.00159316
PLA2G2D	82.9828	2.4904	0.674081	3.69451	0.000220312	0.0032749
PLA2G7	132.093	2.10415	0.381781	5.5114	3.55988e-08	2.90165e-06
PLAC8	15.2197	1.37847	0.334948	4.11548	3.86368e-05	0.000846281
PLCXD2	1.42625	1.38696	0.494466	2.80496	0.00503225	0.0324671
PLEK	222.895	1.69544	0.279519	6.06556	1.31496e-09	1.76051e-07
PLEKHA1	865.788	1.27469	0.236089	5.39921	6.6934e-08	4.90209e-06
PLEKHG4B	905.506	1.35339	0.30621	4.41981	9.87858e-06	0.000284603
PNOC	2.51752	3.12334	0.815872	3.82823	0.00012907	0.00216861
POU2AF1	23.0537	4.08652	0.666444	6.13182	8.68788e-10	1.22994e-07
POU2F2	49.4269	1.17619	0.277801	4.23391	2.29658e-05	0.000555745
POU3F3	42.3513	1.10164	0.394752	2.79072	0.00525902	0.0335498
POU4F1	2.10805	1.32459	0.419198	3.15982	0.00157868	0.0139641
PPFIA2	3.78053	1.76317	0.452632	3.89537	9.80486e-05	0.00176166
PPM1E	62.2494	1.02006	0.355908	2.86607	0.00415599	0.0282294
PPP1R14C	15.8774	1.82373	0.493571	3.69497	0.000219913	0.0032742
PPP2R2B	50.8083	2.04119	0.370774	5.5052	3.6874e-08	2.97283e-06
PPP2R2C	26.936	1.70743	0.32305	5.28535	1.25463e-07	8.43679e-06
PRDM1	78.112	1.43194	0.244187	5.86409	4.51596e-09	4.93056e-07
PRDM12	1.54433	1.52379	0.425826	3.57842	0.000345678	0.00455993
PRDM6	5.7064	1.52186	0.36666	4.15059	3.31619e-05	0.000747862
PRDM8	15.0938	1.79837	0.346545	5.18942	2.10946e-07	1.29223e-05
PRF1	201.862	2.2871	0.334351	6.8404	7.89726e-12	2.14371e-09
PRG4	9.92111	1.00121	0.311513	3.21404	0.00130883	0.0121894
PRR33	6.64205	2.18473	0.396276	5.51314	3.52483e-08	2.88102e-06
PRR5L	96.9055	1.28403	0.200071	6.41787	1.38194e-10	2.49323e-08
PRRT2	23.088	1.42713	0.254729	5.60255	2.11216e-08	1.85444e-06
PSD2	55.2986	1.79832	0.410907	4.37647	1.20616e-05	0.000333844
PSMB8	3645.37	1.3541	0.228106	5.93625	2.91614e-09	3.41039e-07
PSMB8-AS1	272.03	1.87452	0.31303	5.98829	2.12054e-09	2.66989e-07
PSMB9	1371.05	2.46806	0.357704	6.89972	5.21043e-12	1.57313e-09
PSPC1P1	9.96807	1.26965	0.270518	4.69341	2.68688e-06	9.96232e-05
PTBP1P	1.09397	1.15655	0.412441	2.80416	0.00504477	0.0325074
PTGS2	11.8246	1.21726	0.309855	3.9285	8.54786e-05	0.00158269
PTP4A3	10103.8	1.35485	0.258863	5.23385	1.66011e-07	1.06089e-05
PTPN22	20.7894	3.09729	0.392148	7.89828	2.82777e-15	2.2613e-12
PTPN6	506.396	1.47121	0.268993	5.46933	4.51734e-08	3.48071e-06
PTPN7	112.864	2.8402	0.356787	7.9605	1.71348e-15	1.49113e-12
PTPRC	236.643	2.92707	0.343802	8.51383	1.68281e-17	3.3194e-14
PTPRD	20.8775	1.42252	0.410495	3.46538	0.000529477	0.006274
PTPRE	93.5047	1.29054	0.217138	5.94339	2.79183e-09	3.30419e-07
PTPRN	25.2728	1.16835	0.398336	2.93308	0.00335615	0.0241493
PTPRO	21.1083	1.27563	0.317883	4.0129	5.99775e-05	0.00119503
PVALB	20.7613	1.57094	0.359613	4.36842	1.25151e-05	0.000344437
PXDN	973.336	1.31407	0.277908	4.72846	2.26233e-06	8.6595e-05
QPCT	3682.71	1.58493	0.321495	4.92986	8.22891e-07	3.81625e-05
RAB31	960.781	1.18927	0.26087	4.55887	5.14294e-06	0.000171169
RAB3C	11.1088	1.41318	0.337867	4.18264	2.88141e-05	0.000670244
RAB7B	53.0441	1.50944	0.274321	5.50246	3.74534e-08	2.99506e-06
RAC2	674.982	1.19636	0.291851	4.09922	4.14551e-05	0.000897932
RARRES3	1081.63	2.21028	0.352781	6.2653	3.7211e-10	5.79474e-08
RASAL3	129.621	1.89024	0.296603	6.37296	1.85413e-10	3.22706e-08
RASGRP1	52.0172	1.28006	0.42612	3.004	0.00266459	0.0204121
RASGRP2	61.3688	1.06538	0.246667	4.31912	1.56655e-05	0.0004091
RASL11B	42.6384	1.62751	0.345982	4.70404	2.55066e-06	9.57649e-05
RASSF5	152.438	1.65544	0.265172	6.24291	4.29498e-10	6.51692e-08
RASSF6	2.05603	2.27299	0.685122	3.31764	0.000907811	0.00936444
RBM44	5.96102	1.12799	0.364648	3.09336	0.00197906	0.0164392
RCSD1	171.156	1.13907	0.214194	5.31794	1.0495e-07	7.22156e-06
RDH10-AS1	2.22686	1.11905	0.371265	3.01416	0.00257692	0.0199375
REEP1	174.928	1.02346	0.289353	3.53706	0.000404613	0.00515355
RGS1	398.968	1.78773	0.492042	3.63328	0.000279836	0.00394089
RGS18	10.8512	1.98324	0.399154	4.96861	6.74349e-07	3.31439e-05
RGS8	8.58343	2.05369	0.70088	2.93016	0.00338785	0.02433
RHOH	33.6701	2.88935	0.398206	7.25591	3.9898e-13	1.66268e-10
RIMBP3	11.0733	1.15348	0.315765	3.65297	0.000259223	0.00371243
RIMS2	563.754	4.74175	0.624091	7.59785	3.01099e-14	1.74685e-11
RN7SL130P	0.800762	1.79752	0.513411	3.50114	0.000463273	0.00569005
RN7SL491P	14.4873	1.28127	0.36939	3.46861	0.000523163	0.00621125
RN7SL834P	3.84652	1.24021	0.3284	3.77651	0.000159042	0.00255053
RNA5SP108	1.0016	1.32207	0.48608	2.71987	0.00653071	0.0391393
RNASE6	234.704	1.18765	0.244284	4.86175	1.16351e-06	5.03303e-05
RNF125	111.729	1.44001	0.256765	5.60825	2.04379e-08	1.80512e-06
RNF144A-AS1	19.9473	1.91922	0.358746	5.34979	8.80545e-08	6.19931e-06
RNF182	7.49116	1.59822	0.362207	4.41245	1.02206e-05	0.000292179
RNU1-122P	1.02183	1.29704	0.452459	2.86665	0.00414846	0.0281977
RNU1-36P	12.5567	1.12455	0.340394	3.30368	0.000954255	0.00970578
RNU1-47P	2.87391	1.15024	0.31986	3.59607	0.000323065	0.00435183
RNU4-62P	0.606861	1.79158	0.687765	2.60494	0.00918915	0.0496963
RNY1P16	0.671173	1.31882	0.499328	2.64119	0.00826143	0.0460926
RNY3P16	2.72947	1.50773	0.384208	3.92424	8.70038e-05	0.00160391
RP1-102E24.8	20.9111	1.11599	0.249782	4.46785	7.90098e-06	0.000241218
RP1-117B12.4	0.778025	1.34691	0.51285	2.62633	0.00863119	0.0475962
RP1-122K4.2	0.861381	2.43701	0.662084	3.68081	0.000232494	0.00342159
RP1-137D17.1	3.05381	1.39958	0.46747	2.99394	0.00275402	0.020926
RP1-199J3.6	5.83088	1.06402	0.290677	3.6605	0.000251724	0.00363318
RP1-239B22.5	138.413	1.08939	0.282032	3.86265	0.000112163	0.00194302
RP1-244F24.1	0.794833	1.65243	0.478823	3.45103	0.000558449	0.00654651
RP1-29C18.9	8.21958	2.74498	0.446245	6.15129	7.68562e-10	1.10928e-07
RP1-302G2.5	0.502668	1.62996	0.621685	2.62184	0.00874576	0.0480806
RP1-35C21.1	0.476597	1.5759	0.547808	2.87674	0.00401812	0.0275399
RP1-47M23.3	1.94098	3.10559	0.663475	4.68079	2.8577e-06	0.00010495
RP1-50J22.4	1.63119	1.66044	0.507752	3.27018	0.00107478	0.0105161
RP1-79C4.4	0.979127	1.71422	0.523272	3.27596	0.00105302	0.0103442
RP11-100E13.1	2.91359	2.51395	0.500778	5.0201	5.16442e-07	2.67609e-05
RP11-1018N14.5	2.89783	2.79791	0.599821	4.66457	3.09265e-06	0.000112294
RP11-101O6.2	2.31738	1.37289	0.33537	4.09365	4.24636e-05	0.000915753
RP11-1094M14.5	2.61885	3.04489	0.594321	5.12332	3.00202e-07	1.72814e-05
RP11-1094M14.8	10.6561	3.35287	0.451158	7.43169	1.07221e-13	5.11685e-11
RP11-10J21.4	3.52827	1.06451	0.284358	3.74357	0.000181425	0.00282042
RP11-10J5.1	0.69997	2.06171	0.716689	2.87672	0.00401837	0.0275399
RP11-113E21.3	0.755254	1.42749	0.526944	2.709	0.0067486	0.040078
RP11-1149M10.2	5.10533	1.43604	0.324286	4.4283	9.49803e-06	0.000276874
RP11-120K18.3	1.07973	1.78611	0.521307	3.42623	0.000612032	0.00701892
RP11-121A8.1	4.39516	1.67723	0.3963	4.23222	2.31393e-05	0.000558437
RP11-12M5.3	3.37147	1.54868	0.436321	3.54942	0.000386086	0.00497324
RP11-131H24.4	0.922479	2.19365	0.593654	3.69517	0.000219744	0.00327381
RP11-135F9.4	2.57595	1.09599	0.311823	3.51479	0.000440099	0.00547129
RP11-13N13.5	0.947668	1.60655	0.396021	4.05673	4.97637e-05	0.00103327
RP11-143A12.3	9.84691	1.12703	0.409269	2.75377	0.00589127	0.0364286
RP11-150O12.6	8.89102	1.04102	0.317919	3.27448	0.00105856	0.0103883
RP11-152P23.2	1.16183	1.03666	0.390871	2.65218	0.00799748	0.0449643
RP11-15I11.3	8.93862	1.37411	0.426004	3.22558	0.00125718	0.01181
RP11-161H23.8	1.72407	1.80279	0.48281	3.73396	0.000188493	0.00290022
RP11-169D4.2	3.58098	1.40005	0.403659	3.46841	0.000523552	0.00621125
RP11-16E12.2	10.7466	1.5735	0.391215	4.02207	5.7689e-05	0.00116185
RP11-16E18.3	33.6228	1.41413	0.216356	6.53613	6.31303e-11	1.27068e-08
RP11-171I2.1	1.02118	1.55672	0.533484	2.91802	0.00352264	0.0250493
RP11-181E10.3	0.796874	2.37846	0.64454	3.69017	0.000224104	0.00332204
RP11-187C18.3	11.5409	1.08042	0.283644	3.80907	0.000139489	0.00230699
RP11-18B16.2	23.8643	1.60641	0.418573	3.83783	0.000124127	0.00210468
RP11-18H21.1	1.73145	2.89982	0.616874	4.70083	2.59103e-06	9.6826e-05
RP11-192P3.4	0.922637	1.55366	0.508932	3.05278	0.00226732	0.0181803
RP11-196G18.3	2.16597	1.41575	0.458939	3.08484	0.00203661	0.0168228
RP11-1C8.5	1.61477	1.66205	0.45837	3.62601	0.000287838	0.0040208
RP11-203B9.4	14.0716	1.14008	0.227119	5.01973	5.17436e-07	2.67655e-05
RP11-203P23.2	10.8229	3.25293	0.656254	4.95681	7.16611e-07	3.42538e-05
RP11-20I20.4	70.4933	1.38404	0.240803	5.74759	9.05251e-09	8.89853e-07
RP11-211G23.2	9.42376	1.99132	0.524024	3.80005	0.000144667	0.00237408
RP11-212I21.2	3.73419	2.90536	0.48629	5.97455	2.30727e-09	2.83268e-07
RP11-215D10.1	1.42444	1.4789	0.456638	3.23867	0.00120088	0.0114323
RP11-222K16.2	50.5953	1.18254	0.33978	3.48031	0.000500825	0.00603602
RP11-223C24.1	2.09659	2.13422	0.446929	4.77531	1.7943e-06	7.20351e-05
RP11-227D2.3	5.97249	2.14435	0.584873	3.66635	0.00024604	0.00357204
RP11-23J18.1	2.07451	1.35981	0.438415	3.10165	0.00192444	0.0160908
RP11-23P13.6	1.89946	1.64056	0.53925	3.0423	0.0023478	0.0186343
RP11-242J7.1	0.896435	2.65769	0.679449	3.91153	9.17119e-05	0.00166989
RP11-245G13.2	8.70451	1.8492	0.421451	4.38769	1.14559e-05	0.000320376
RP11-25K19.1	7.56362	1.39505	0.357409	3.90322	9.49214e-05	0.00171461
RP11-264J4.8	1.22768	1.19949	0.420591	2.85192	0.00434555	0.0291541
RP11-267M23.6	1.28306	1.07535	0.395027	2.72222	0.00648445	0.0389157
RP11-26J3.1	0.826617	1.25634	0.445983	2.81701	0.00484737	0.0315583
RP11-26J3.3	44.1686	1.13288	0.215019	5.26875	1.37354e-07	9.09182e-06
RP11-275I14.4	2.10783	1.08639	0.33001	3.29197	0.000994865	0.00998171
RP11-282O18.7	1.07086	1.01139	0.375162	2.69589	0.00702018	0.0411395
RP11-283G6.4	10.286	1.59725	0.338377	4.72034	2.35456e-06	8.9661e-05
RP11-284F21.9	5.97704	1.25141	0.392584	3.18762	0.00143448	0.0129995
RP11-284N8.3	11.0379	2.45303	0.494046	4.96519	6.86354e-07	3.34754e-05
RP11-290F5.1	5.0913	3.53377	0.560446	6.30528	2.87672e-10	4.69642e-08
RP11-290F5.2	2.4884	1.09452	0.316264	3.46077	0.000538635	0.00635959
RP11-291B21.2	1.94036	2.7067	0.754074	3.58943	0.000331399	0.00443083
RP11-295M3.4	7.43386	1.18576	0.326262	3.63439	0.000278637	0.00393148
RP11-297J22.1	0.910603	1.74803	0.519587	3.36427	0.000767455	0.00827833
RP11-299H22.3	0.708658	2.29336	0.846302	2.70986	0.00673112	0.0400081
RP11-305L7.1	9.40367	1.05406	0.229429	4.59427	4.34257e-06	0.000148732
RP11-305L7.3	1.95163	1.17402	0.334335	3.5115	0.000445586	0.00551631
RP11-307C18.1	18.5455	1.01126	0.282016	3.58582	0.000336023	0.00446642
RP11-30L15.4	10.0288	1.19237	0.278769	4.27727	1.89201e-05	0.000472502
RP11-312J18.6	0.942219	1.83269	0.619843	2.95671	0.0031094	0.0228915
RP11-313E19.2	0.721872	1.89115	0.668568	2.82866	0.00467427	0.0307339
RP11-315A16.1	1.302	2.17431	0.539204	4.03245	5.51983e-05	0.00112017
RP11-315F22.1	2.15256	1.39283	0.454331	3.06568	0.00217177	0.0176099
RP11-316M21.7	5.21295	1.03596	0.308361	3.35956	0.000780659	0.00839073
RP11-320M16.2	3.09169	2.32687	0.670183	3.472	0.000516605	0.00616592
RP11-323P17.2	0.932446	1.242	0.428229	2.90032	0.00372779	0.0261007
RP11-325F22.2	1.98159	1.51787	0.487469	3.11377	0.0018471	0.0156417
RP11-326C3.2	20.892	1.1628	0.296336	3.92392	8.71213e-05	0.00160507
RP11-326I11.5	4.06931	1.00934	0.297699	3.39048	0.000697707	0.00771224
RP11-327F22.2	2.04148	2.09592	0.446278	4.69645	2.64718e-06	9.8398e-05
RP11-330H6.6	0.6411	1.78514	0.60613	2.94515	0.00322801	0.0234727
RP11-335O4.3	0.521618	1.30071	0.487846	2.66622	0.00767098	0.0436602
RP11-338C15.3	1.20118	1.32014	0.372948	3.53974	0.000400515	0.00510773
RP11-33I11.3	0.668483	1.54302	0.554121	2.78462	0.00535903	0.0340118
RP11-345N11.1	3.57905	1.7201	0.435394	3.95068	7.7928e-05	0.00147143
RP11-34A14.3	7.92933	1.26858	0.340838	3.72194	0.000197696	0.00301361
RP11-350N15.4	1.39935	1.18533	0.392319	3.02135	0.0025165	0.0195943
RP11-353N14.7	29.739	1.05245	0.363035	2.89902	0.00374326	0.0261772
RP11-367G6.3	1.24119	1.92652	0.660972	2.91468	0.00356057	0.0252335
RP11-368J21.3	17.3412	1.19635	0.299713	3.99164	6.56172e-05	0.00128235
RP11-383J24.1	0.934932	2.80149	0.817599	3.42648	0.000611458	0.00701505
RP11-386M24.8	27.6734	1.42258	0.462845	3.07356	0.0021152	0.0172838
RP11-387D10.4	0.580692	1.4434	0.535866	2.69359	0.00706875	0.0413095
RP11-390K5.1	28.6198	1.17075	0.292582	4.00145	6.29551e-05	0.00123851
RP11-394O4.5	17.772	1.6567	0.338185	4.8988	9.64254e-07	4.33592e-05
RP11-39H3.2	1.37849	1.16129	0.418299	2.77621	0.0054997	0.034674
RP11-3L21.2	0.701635	2.5692	0.670975	3.82905	0.000128639	0.0021626
RP11-403A3.3	3.96123	3.89156	0.661767	5.88056	4.08886e-09	4.58262e-07
RP11-408E5.5	1.19498	2.05551	0.622601	3.30148	0.000961746	0.00976421
RP11-411K7.1	0.611697	1.59937	0.490118	3.26323	0.0011015	0.0106927
RP11-416N13.1	0.563618	1.28491	0.472793	2.7177	0.00657384	0.0393102
RP11-426C22.4	1.79207	1.07776	0.379232	2.84196	0.00448366	0.0297804
RP11-426J5.3	5.0138	1.21807	0.394161	3.09028	0.00199966	0.0165731
RP11-426L16.3	2.97707	1.19906	0.34474	3.47816	0.000504876	0.00607441
RP11-432J24.5	32.3485	1.46766	0.314642	4.66454	3.09314e-06	0.000112294
RP11-43N5.1	1.66769	1.50264	0.360563	4.16749	3.07974e-05	0.000706383
RP11-450H6.3	1.34028	2.0706	0.497997	4.15785	3.21251e-05	0.000730605
RP11-452C13.1	2.89886	1.10225	0.39773	2.77136	0.00558226	0.0350749
RP11-455F5.5	2.62017	2.17799	0.467514	4.65866	3.18277e-06	0.000115265
RP11-457P14.5	1.27279	1.93778	0.529081	3.66254	0.000249723	0.0036131
RP11-459E5.1	0.857832	1.68022	0.630054	2.66678	0.00765817	0.0436376
RP11-467L13.5	10.4578	2.24773	0.452708	4.96507	6.86751e-07	3.34754e-05
RP11-472N13.3	3.69336	1.71715	0.39093	4.39248	1.12064e-05	0.000314885
RP11-473M20.9	6.55656	1.39138	0.316226	4.39995	1.08273e-05	0.000306564
RP11-473O4.5	4.68524	1.44314	0.386181	3.73694	0.000186272	0.00287502
RP11-481A20.10	1.0148	2.16245	0.543932	3.97558	7.02087e-05	0.0013542
RP11-483P21.2	2.38766	1.30265	0.369204	3.52827	0.00041828	0.00529345
RP11-484N16.1	1.56672	1.14828	0.394696	2.90928	0.00362262	0.0255814
RP11-489O18.1	4.72139	2.09268	0.409978	5.10437	3.31903e-07	1.86344e-05
RP11-48B3.3	33.0129	1.36252	0.311917	4.36823	1.25258e-05	0.000344437
RP11-48B3.4	233.283	1.44801	0.274571	5.27373	1.33677e-07	8.9082e-06
RP11-492E3.2	1.51658	2.00824	0.715377	2.80724	0.0049968	0.0322877
RP11-493L12.4	0.940655	2.28884	0.622861	3.67471	0.000238117	0.00348438
RP11-493L12.6	1.74494	3.71962	0.880839	4.22282	2.41263e-05	0.000578954
RP11-495P10.10	1.70316	1.15102	0.418553	2.74999	0.00595963	0.036675
RP11-497H16.7	1.78979	1.33983	0.379717	3.52849	0.000417933	0.00529132
RP11-4B16.3	43.7559	2.20441	0.448405	4.91611	8.82795e-07	4.04964e-05
RP11-4B16.4	100.962	1.47104	0.297977	4.93676	7.94296e-07	3.70688e-05
RP11-508N22.13	1.87437	1.06509	0.400988	2.65617	0.00790333	0.0445756
RP11-521I2.3	4.15976	1.13414	0.341612	3.31997	0.000900279	0.0093085
RP11-527H14.4	39.1363	1.72596	0.51487	3.35223	0.00080163	0.00856887
RP11-532M24.1	13.025	1.12782	0.254167	4.43732	9.1087e-06	0.000267901
RP11-546B15.1	2.99727	1.00613	0.324135	3.10405	0.0019089	0.0160092
RP11-556E13.1	1.46072	2.66684	0.598215	4.458	8.27283e-06	0.00024901
RP11-557H15.4	47.6079	1.37528	0.486237	2.82843	0.00467774	0.0307362
RP11-576N17.5	0.6347	1.55534	0.472696	3.29035	0.00100062	0.0100089
RP11-598F7.3	2.6389	2.96393	0.599984	4.94001	7.81167e-07	3.66739e-05
RP11-598F7.5	18.0704	1.32446	0.263711	5.02238	5.10359e-07	2.65854e-05
RP11-598F7.6	8.60573	1.04678	0.269383	3.88584	0.000101978	0.00181301
RP11-609D21.3	1.42935	2.48081	0.589031	4.21168	2.53481e-05	0.000605326
RP11-612B6.2	17.4677	1.59028	0.332809	4.77836	1.76728e-06	7.11432e-05
RP11-616M22.11	2.47716	1.93752	0.608026	3.18657	0.00143971	0.0130389
RP11-624L4.1	0.606159	1.98175	0.753014	2.63176	0.0084943	0.0470468
RP11-638I2.10	1.79067	2.22361	0.454308	4.89451	9.85514e-07	4.3981e-05
RP11-638I2.9	17.1139	2.85395	0.423281	6.74245	1.5574e-11	3.62837e-09
RP11-64B16.2	13.4607	1.21971	0.298356	4.08809	4.34932e-05	0.000932519
RP11-652L8.4	1.84431	1.79779	0.389879	4.61115	4.0044e-06	0.000139064
RP11-656D10.7	4.03383	1.26766	0.384486	3.29703	0.000977133	0.00985808
RP11-666F17.1	1.54231	1.10746	0.356954	3.10251	0.00191885	0.0160608
RP11-686D22.10	1.41517	2.45925	0.58674	4.19138	2.77263e-05	0.000651492
RP11-686D22.5	1.04154	1.34826	0.446308	3.02091	0.00252016	0.0196049
RP11-689B22.2	0.694029	2.16105	0.656061	3.29398	0.000987783	0.00993086
RP11-68I3.10	0.627348	1.6069	0.455083	3.53101	0.00041398	0.00525251
RP11-693N9.2	21.4918	1.28059	0.232068	5.51818	3.42532e-08	2.80743e-06
RP11-697N18.3	9.79006	1.21261	0.270243	4.48712	7.21932e-06	0.000223437
RP11-697N18.4	1.66237	1.50151	0.453906	3.30798	0.000939728	0.00961467
RP11-698N11.2	0.744683	2.58947	0.773328	3.34847	0.00081258	0.00866089
RP11-6I2.3	3.59667	1.71324	0.432539	3.96089	7.46717e-05	0.00142449
RP11-709A23.2	0.905598	2.38672	0.636209	3.75148	0.000175796	0.00275646
RP11-713M15.2	24.1465	1.09697	0.352075	3.11573	0.00183489	0.0155471
RP11-714G18.1	9.66931	1.70861	0.3608	4.73562	2.18382e-06	8.42562e-05
RP11-734K21.3	0.679605	1.93146	0.711257	2.71556	0.00661648	0.0395172
RP11-736N17.10	1.64274	2.18152	0.488481	4.46593	7.97218e-06	0.000242322
RP11-73K9.3	1.68532	1.03508	0.310907	3.32922	0.000870891	0.00908921
RP11-756J15.2	1.0546	2.73303	0.665881	4.10438	4.05402e-05	0.000881988
RP11-758N13.3	6.25708	1.09962	0.316755	3.4715	0.00051755	0.00617079
RP11-773H22.4	1.93493	1.12018	0.32191	3.4798	0.000501784	0.0060451
RP11-785G17.1	0.595601	2.33147	0.662886	3.51715	0.000436213	0.00543896
RP11-797H7.5	2.44199	1.13348	0.383265	2.95743	0.00310212	0.0228493
RP11-803D5.1	0.803694	1.87687	0.51912	3.61549	0.000299782	0.00412556
RP11-807H22.7	1.65207	1.86842	0.446775	4.18202	2.88934e-05	0.000671035
RP11-809H16.3	2.06728	2.33683	0.590505	3.95734	7.57904e-05	0.00144026
RP11-815J21.4	2.34892	1.28072	0.473345	2.70568	0.0068164	0.0403623
RP11-815N9.2	3.84535	1.44859	0.423736	3.41861	0.000629422	0.00715457
RP11-81H14.2	4.62319	1.45885	0.466476	3.12739	0.00176365	0.0151342
RP11-834C11.10	1.52251	1.02231	0.379403	2.69453	0.00704873	0.0412458
RP11-834C11.7	1.94477	1.85639	0.450732	4.1186	3.81178e-05	0.000837987
RP11-848G14.5	14.9218	1.30348	0.32843	3.96882	7.22283e-05	0.00138448
RP11-848P1.3	16.5415	1.13591	0.229326	4.95323	7.29903e-07	3.48328e-05
RP11-867G23.10	9.48979	1.49055	0.414639	3.59481	0.000324629	0.00436795
RP11-88G17.6	0.957778	1.84293	0.537657	3.42771	0.000608702	0.00699428
RP11-8L8.2	2.51137	1.01546	0.290813	3.49179	0.000479788	0.00584678
RP11-90P13.1	13.1927	1.12441	0.287493	3.91109	9.18819e-05	0.00167093
RP13-33H18.1	2.35426	1.26745	0.374411	3.38518	0.000711307	0.00781514
RP13-580F15.2	1.9474	1.29231	0.46444	2.78252	0.00539378	0.0341737
RP3-439F8.1	27.0462	1.70729	0.338993	5.03636	4.74479e-07	2.49359e-05
RP3-455J7.4	1.69136	1.70367	0.489259	3.48215	0.000497407	0.0060095
RP3-477O4.14	2.2626	1.40264	0.359117	3.90581	9.39118e-05	0.00169788
RP3-522J7.6	1.91447	1.18466	0.356611	3.322	0.000893732	0.00925901
RP4-569M23.4	1.1201	1.17012	0.441581	2.64984	0.00805302	0.0451959
RP4-580O19.2	1.14967	1.37285	0.412294	3.32978	0.000869137	0.00908291
RP4-583P15.16	1.26788	1.09088	0.332636	3.2795	0.0010399	0.010263
RP4-584D14.6	1.76795	1.07428	0.332802	3.22799	0.00124665	0.0117422
RP4-616B8.5	2.11686	1.60914	0.392651	4.09815	4.16468e-05	0.000900583
RP4-671O14.5	0.596963	1.87517	0.53142	3.5286	0.000417763	0.00529132
RP4-671O14.7	1.57312	1.50733	0.423102	3.56256	0.00036725	0.00477635
RP4-728D4.2	6.10723	1.05082	0.320476	3.27893	0.00104203	0.0102772
RP4-742C19.12	1.32146	3.11773	0.554456	5.62305	1.87612e-08	1.68214e-06
RP4-753P9.3	0.896456	1.64482	0.513538	3.20291	0.00136044	0.0125203
RP4-785G19.5	5.54028	1.11572	0.306745	3.63727	0.00027554	0.00389706
RP5-1007F24.1	2.85148	1.47825	0.441828	3.34575	0.000820611	0.00871212
RP5-1028K7.2	8.27703	3.52073	0.547904	6.42582	1.31164e-10	2.39948e-08
RP5-1029F21.4	0.697885	1.21559	0.428805	2.83482	0.00458512	0.0303038
RP5-1031D4.3	15.1227	1.37854	0.385692	3.5742	0.000351307	0.00461403
RP5-1050D4.2	2.68705	1.1631	0.29915	3.888	0.000101072	0.00180152
RP5-1071N3.1	3.44059	1.728	0.364526	4.7404	2.13301e-06	8.28235e-05
RP5-1091N2.9	3.86084	2.16251	0.389168	5.55675	2.74849e-08	2.31688e-06
RP5-1171I10.5	21.6161	2.7965	0.396252	7.05739	1.69658e-12	5.90569e-10
RP5-826L7.1	0.977887	1.68784	0.53379	3.162	0.00156688	0.0139138
RP5-864K19.7	0.657902	1.38206	0.460675	3.00007	0.00269922	0.0205789
RP5-943J3.1	0.964142	1.42873	0.509642	2.8034	0.0050567	0.0325665
RP6-109B7.5	1.31201	1.19756	0.384301	3.1162	0.00183197	0.0155358
RP6-74O6.6	1.71911	1.21388	0.426485	2.84624	0.00442383	0.0295535
RPL23AP32	1.38534	1.20337	0.44187	2.72335	0.00646239	0.0388163
RPL4P1	2.90012	1.25353	0.350868	3.57265	0.000353382	0.00463675
RPL7AP64	1.01111	1.15157	0.426815	2.69806	0.00697457	0.0409838
RPS20P22	2.0434	1.33853	0.354539	3.77542	0.00015974	0.00255895
RPS20P35	7.38364	1.34333	0.356372	3.76945	0.000163606	0.00260959
RRM2B	1811.99	1.04828	0.224631	4.66667	3.06127e-06	0.000111469
RS1	16.093	1.92006	0.610703	3.14402	0.00166645	0.0145879
RUFY4	4.81286	1.93988	0.485407	3.9964	6.43138e-05	0.00126021
S100A2	12.2872	1.28824	0.257055	5.01154	5.3996e-07	2.75908e-05
S100A3	11.0013	2.07833	0.323447	6.42557	1.31376e-10	2.39948e-08
S100A4	1086.61	2.55607	0.330359	7.73725	1.01587e-14	7.51441e-12
S1PR4	27.4451	1.54473	0.344876	4.4791	7.49598e-06	0.000230552
SALL3	1.38583	2.70042	0.679138	3.97625	7.00119e-05	0.00135128
SAMSN1	46.7772	2.18359	0.345597	6.31832	2.64425e-10	4.3954e-08
SASH3	227.427	1.6958	0.292303	5.80151	6.57196e-09	6.88172e-07
SCIMP	68.8682	1.37598	0.245574	5.60312	2.10533e-08	1.85395e-06
SCML4	8.7414	2.0365	0.445716	4.56905	4.89937e-06	0.000164357
SCN10A	0.911369	1.94849	0.631159	3.08716	0.0020208	0.0167109
SCN1A	2.88086	1.94225	0.515766	3.76577	0.000166037	0.00263354
SCN3A	1.01776	1.83368	0.641646	2.85778	0.00426622	0.0287865
SCRG1	20.854	1.27177	0.466856	2.72412	0.00644731	0.0387808
SDC2	458.627	1.18632	0.336428	3.52623	0.000421525	0.00532539
SDS	127.793	1.73415	0.350323	4.95014	7.41591e-07	3.52202e-05
SEC24D	340.394	1.07652	0.185707	5.79687	6.75634e-09	7.00162e-07
SECTM1	366.532	1.77575	0.310825	5.713	1.11002e-08	1.07331e-06
SEL1L3	538.257	1.5147	0.354132	4.27723	1.89237e-05	0.000472502
SELL	94.4137	1.09954	0.344691	3.18993	0.00142309	0.0129319
SERPINE1	209.185	1.31463	0.318064	4.13322	3.57718e-05	0.000794009
SFN	11.4814	1.2046	0.391463	3.07718	0.00208968	0.0171463
SFTA1P	4.98456	2.00004	0.329021	6.07874	1.21128e-09	1.65923e-07
SFTPA2	1.1515	2.37762	0.801651	2.96591	0.00301789	0.0223625
SFTPB	2.77752	1.63596	0.494262	3.30991	0.000933255	0.0095746
SGIP1	17.1962	1.38485	0.305302	4.536	5.73311e-06	0.000185154
SH2D1A	27.9726	4.27177	0.494892	8.63173	6.04297e-18	1.62545e-14
SH2D1B	2.58675	1.42281	0.406581	3.49945	0.000466219	0.00571437
SH2D5	111.401	1.08182	0.247096	4.37814	1.19694e-05	0.000331913
SHD	1.33134	1.70423	0.560418	3.041	0.00235794	0.0186842
SHH	1.13705	1.72097	0.489326	3.51702	0.000436429	0.00543937
SIAH3	2.42871	1.32569	0.474237	2.79542	0.00518329	0.0331524
SIGLEC10	98.6808	2.04963	0.339143	6.04356	1.50755e-09	2.00024e-07
SIGLEC11	18.3393	1.11542	0.272993	4.08591	4.39041e-05	0.000938609
SIGLEC14	28.2763	1.23537	0.318344	3.88063	0.000104187	0.00183712
SIGLEC7	31.2809	1.05338	0.272135	3.8708	0.000108477	0.00189358
SIGLEC8	107.407	2.10829	0.383623	5.49573	3.89103e-08	3.09484e-06
SIGLEC9	41.6708	1.04727	0.244185	4.28883	1.79619e-05	0.000454155
SIRPG	51.674	3.73563	0.546087	6.84073	7.87917e-12	2.14371e-09
SIRPG-AS1	0.647069	2.64678	0.888762	2.97805	0.00290086	0.0217513
SIT1	42.453	2.83081	0.416606	6.79495	1.08351e-11	2.68725e-09
SKAP1	27.1414	2.12621	0.370004	5.74646	9.11292e-09	8.92825e-07
SLA	161.23	1.56308	0.275027	5.68338	1.32056e-08	1.25353e-06
SLA2	37.0028	2.69304	0.381846	7.05268	1.75501e-12	5.97286e-10
SLAMF1	30.365	2.37173	0.4092	5.796	6.79149e-09	7.00162e-07
SLAMF6	50.6493	3.08972	0.412441	7.49129	6.81999e-14	3.42017e-11
SLAMF8	182.606	2.07263	0.322359	6.42955	1.27979e-10	2.38153e-08
SLC12A3	1.52712	1.51104	0.474081	3.18731	0.00143602	0.0130095
SLC16A6	1391.39	1.5657	0.309348	5.06131	4.16391e-07	2.22788e-05
SLC1A1	118.338	1.7832	0.316681	5.6309	1.79268e-08	1.61713e-06
SLC25A47	2.08139	1.01045	0.388425	2.6014	0.00928451	0.0499837
SLC38A5	1788.04	1.46355	0.504622	2.90029	0.00372822	0.0261007
SLC38A8	55.8119	2.34595	0.407292	5.75987	8.41766e-09	8.35778e-07
SLC39A2	3.59053	1.22476	0.467174	2.62162	0.00875119	0.0480962
SLC44A4	3.53622	1.75496	0.487151	3.6025	0.000315169	0.00428112
SLC45A3	64.7335	1.32654	0.253452	5.2339	1.65975e-07	1.06089e-05
SLC47A1	172.7	1.09578	0.257651	4.25297	2.10949e-05	0.000518402
SLC4A10	3.34895	1.87704	0.707778	2.65202	0.00800111	0.0449643
SLC52A1	8.14824	1.42798	0.390887	3.65317	0.000259023	0.00371137
SLC6A1	58.1477	2.04116	0.315838	6.4627	1.02852e-10	1.96334e-08
SLC8A1	108.001	1.45991	0.334456	4.36502	1.27109e-05	0.000347909
SLCO5A1	318.725	1.96462	0.427973	4.59052	4.42141e-06	0.000151238
SLFN11	177.736	1.48546	0.267003	5.56345	2.6449e-08	2.24233e-06
SLFN12L	9.28798	2.9944	0.408849	7.32398	2.40719e-13	1.06304e-10
SLIT1	268.608	2.26092	0.341301	6.62442	3.48604e-11	7.47427e-09
SLITRK6	2.07996	2.35716	0.827382	2.84894	0.00438655	0.0293442
SMIM2	1.12427	1.42307	0.459747	3.09534	0.00196586	0.0163433
SMTNL1	2.52017	1.61159	0.485091	3.32225	0.000892952	0.00925458
SNORA11	40.3555	1.42016	0.365705	3.88334	0.000103032	0.00182001
SNORA12	13.8078	1.4906	0.460386	3.23771	0.00120493	0.0114525
SNORA31	6.92287	1.0862	0.359272	3.02335	0.00249993	0.0195012
SNORA9	2.92291	1.23949	0.419887	2.95196	0.00315766	0.0231145
SNORD12B	2.51573	1.10218	0.355935	3.09658	0.00195768	0.0162982
SNORD12C	0.666817	1.33006	0.504727	2.6352	0.00840865	0.0466881
SNX10	275.891	1.21047	0.307847	3.93207	8.4219e-05	0.00156525
SNX20	58.1871	1.99511	0.331573	6.0171	1.77573e-09	2.29434e-07
SNX25	1935.33	1.01402	0.197988	5.12162	3.02926e-07	1.73701e-05
SNX31	1.09721	1.4063	0.442965	3.17474	0.0014997	0.013475
SOAT2	2.66495	1.69768	0.432973	3.92098	8.81896e-05	0.00161883
SOCS2	220.224	1.68303	0.26299	6.3996	1.55784e-10	2.76008e-08
SOCS2-AS1	50.7115	1.04508	0.279023	3.74549	0.00018004	0.00280962
SORL1	687.53	1.05472	0.327939	3.21622	0.00129892	0.0121161
SP140	40.179	2.40296	0.319257	7.52674	5.20229e-14	2.74867e-11
SPAG1	72.6957	1.11645	0.249925	4.46712	7.92805e-06	0.000241581
SPARCL1	2088.69	1.25414	0.38971	3.21814	0.00129026	0.0120468
SPATC1	1.96544	1.17002	0.365491	3.20124	0.0013684	0.0125739
SPIB	15.57	1.1992	0.389985	3.075	0.00210504	0.0172164
SPIC	0.944413	2.90625	0.738245	3.9367	8.26109e-05	0.00154311
SPN	137.688	2.33191	0.330651	7.05246	1.7578e-12	5.97286e-10
SPOCK2	349.389	1.05821	0.282691	3.74334	0.000181591	0.00282042
SPON2	10747.3	1.25046	0.256704	4.87119	1.10928e-06	4.81254e-05
SQLE	1456.67	1.48635	0.229903	6.46513	1.01213e-10	1.9446e-08
SRGAP2C	110.318	1.01015	0.20153	5.01238	5.37618e-07	2.75685e-05
SRGAP2D	5.79801	1.09666	0.328141	3.34204	0.000831665	0.00879165
SSBP3-AS1	20.3459	1.48023	0.285064	5.19264	2.07333e-07	1.2807e-05
SSTR3	2.26361	2.53052	0.651631	3.88336	0.000103021	0.00182001
SSX5	82.7728	1.96946	0.561671	3.50643	0.000454153	0.00559662
ST18	1.84369	1.76765	0.501436	3.52517	0.000423217	0.00534221
ST8SIA2	32.3683	2.24777	0.472815	4.75402	1.9941e-06	7.84594e-05
ST8SIA4	66.1656	1.81345	0.288356	6.28893	3.19665e-10	5.08508e-08
STAP1	2.34662	1.8231	0.536214	3.39995	0.000673989	0.00751676
STAT1	5820.33	1.66488	0.261522	6.36611	1.93878e-10	3.35465e-08
STK17B	138.662	1.62027	0.257318	6.29677	3.0391e-10	4.88701e-08
STYK1	1.18872	1.52141	0.547824	2.77718	0.00548327	0.0345887
SUCNR1	17.531	1.3374	0.38274	3.49427	0.000475354	0.0058047
SUSD4	11.5671	1.64018	0.384058	4.27065	1.94903e-05	0.000485011
SV2C	7.75925	2.19692	0.455273	4.8255	1.39656e-06	5.81991e-05
SYT11	251.309	1.00462	0.297138	3.38097	0.0007223	0.00790948
TAGAP	59.9989	1.33888	0.259712	5.15526	2.53285e-07	1.50486e-05
TAGLN3	7.85845	1.98287	0.705511	2.81054	0.0049458	0.0320001
TAP1	5314.12	2.15254	0.263114	8.18099	2.81518e-16	3.73234e-13
TAS2R10	0.892194	1.44515	0.511396	2.82589	0.00471489	0.0309116
TBC1D10C	111.307	2.13658	0.317164	6.73651	1.62234e-11	3.72108e-09
TBC1D27	1.20669	2.67031	0.737269	3.6219	0.000292452	0.00405866
TBX18	41.1911	1.82022	0.364968	4.98735	6.12126e-07	3.06087e-05
TBX20	1.2795	1.83096	0.650197	2.816	0.0048625	0.0316132
TBX21	20.1988	2.11688	0.38283	5.52957	3.21021e-08	2.65318e-06
TCEAL6	3.3955	1.62383	0.4776	3.39997	0.000673931	0.00751676
TCHH	23.0852	1.30553	0.293368	4.45014	8.58131e-06	0.000255436
TCN1	34.5918	1.75012	0.551963	3.17072	0.00152063	0.0136134
TDH	16.7269	1.28969	0.417403	3.08981	0.00200288	0.0165905
TDO2	6.89926	1.77411	0.400989	4.42433	9.67418e-06	0.000279824
TDRD15	0.940117	1.96876	0.628555	3.1322	0.00173502	0.0149884
TDRG1	1.88417	1.51337	0.554651	2.72851	0.00636211	0.0383849
TENM1	5.00223	1.65245	0.388512	4.25329	2.10657e-05	0.000518114
TESPA1	22.506	2.63907	0.432913	6.09606	1.08714e-09	1.5031e-07
TEX11	1.22282	1.41014	0.44626	3.15992	0.00157812	0.0139641
TFEC	30.6161	2.28354	0.333583	6.84548	7.62175e-12	2.10759e-09
TGFBI	2303.57	1.03343	0.260803	3.9625	7.41703e-05	0.00141767
THBS1	266.288	1.3428	0.290703	4.61915	3.85309e-06	0.000135004
THBS2	504.155	1.50255	0.310754	4.83518	1.33022e-06	5.60094e-05
THEG	0.580393	1.63285	0.569398	2.86768	0.00413496	0.0281254
THEMIS	10.5282	3.51048	0.494638	7.09708	1.27424e-12	4.54243e-10
THEMIS2	576.768	1.037	0.199856	5.18875	2.11707e-07	1.29421e-05
TIFAB	10.6129	2.55645	0.526079	4.85944	1.17716e-06	5.08466e-05
TIGIT	59.3125	4.02984	0.470164	8.57115	1.02454e-17	2.3104e-14
TIMD4	3.06396	1.47594	0.52032	2.83659	0.00455976	0.0301754
TLR10	5.47867	1.85315	0.392189	4.72515	2.29946e-06	8.79022e-05
TLR7	55.0123	1.28826	0.285266	4.51599	6.30207e-06	0.000199216
TLR8	20.0365	2.18985	0.337308	6.49216	8.46158e-11	1.65802e-08
TM4SF19	5.74775	1.62741	0.365574	4.45167	8.52065e-06	0.000254142
TM4SF20	0.887213	1.35781	0.426337	3.18483	0.00144837	0.0131014
TMEM150B	22.0251	1.47669	0.289788	5.09575	3.47363e-07	1.92467e-05
TMEM154	25.0635	1.43667	0.254692	5.64083	1.69235e-08	1.53739e-06
TMEM155	11.0884	1.81102	0.53224	3.40264	0.00066738	0.00746558
TMEM156	7.57009	2.71479	0.506881	5.35586	8.51482e-08	6.0128e-06
TMEM236	32.9263	1.37244	0.286518	4.79007	1.66719e-06	6.77594e-05
TMEM255A	235.128	1.40935	0.425856	3.30945	0.000934796	0.00958709
TMEM257	2.06992	1.95023	0.530943	3.67314	0.000239592	0.00349903
TMEM68	726.724	1.02628	0.180064	5.69954	1.20133e-08	1.14661e-06
TMEM75	1.96433	1.11462	0.355877	3.13203	0.00173601	0.0149884
TMPRSS2	7.06433	1.15851	0.372965	3.10623	0.0018949	0.0159312
TMPRSS6	1.18274	1.28476	0.465022	2.7628	0.00573076	0.0356897
TMSB4XP2	0.779055	1.31662	0.498647	2.64038	0.00828139	0.046171
TNF	7.85114	2.31857	0.442126	5.24413	1.57018e-07	1.01438e-05
TNFAIP2	570.437	1.4879	0.205388	7.24432	4.34623e-13	1.78606e-10
TNFAIP6	15.6291	1.57518	0.383857	4.10357	4.06823e-05	0.000883131
TNFAIP8	101.908	1.26118	0.216513	5.82496	5.71249e-09	6.08505e-07
TNFAIP8L2	77.6039	1.24474	0.234977	5.2973	1.1753e-07	7.97589e-06
TNFRSF11B	17.6085	1.8622	0.367602	5.06581	4.0667e-07	2.19974e-05
TNFRSF13B	4.09871	3.44222	0.802629	4.28868	1.7974e-05	0.000454155
TNFRSF17	2.50881	3.07825	0.806217	3.81814	0.00013446	0.00224515
TNFRSF18	22.1593	1.59373	0.254938	6.25145	4.06649e-10	6.23416e-08
TNFRSF19	1207.88	2.01423	0.342878	5.87448	4.24177e-09	4.71641e-07
TNFRSF1B	888.846	1.33108	0.229756	5.79346	6.895e-09	7.06329e-07
TNFRSF4	66.3692	1.17	0.316352	3.69843	0.000216939	0.00323854
TNFRSF8	20.1941	2.74076	0.361235	7.58719	3.26923e-14	1.86019e-11
TNFRSF9	54.8488	4.78318	0.528362	9.05283	1.39307e-19	1.03045e-15
TNFSF10	91.8506	1.37905	0.28398	4.85615	1.1969e-06	5.14737e-05
TNFSF13B	59.013	2.11584	0.311423	6.79411	1.08987e-11	2.68725e-09
TNFSF14	10.0248	2.00964	0.404917	4.9631	6.93774e-07	3.35682e-05
TNFSF15	15.7773	1.33054	0.322054	4.13141	3.60538e-05	0.000798472
TNFSF18	3.34792	1.00284	0.34679	2.89177	0.00383079	0.0266444
TNFSF8	16.0178	1.2437	0.290637	4.27922	1.8755e-05	0.000469478
TNIP3	3.64005	2.28035	0.580339	3.92935	8.51759e-05	0.00157807
TNR	8.91397	2.06881	0.61063	3.388	0.000704053	0.00775559
TNS4	4.25788	1.30734	0.479487	2.72654	0.00640017	0.03856
TOMM20P2	0.823142	2.29229	0.708056	3.23744	0.00120606	0.0114558
TOX	41.0166	1.72158	0.426788	4.0338	5.48824e-05	0.00111682
TOX2	86.3655	1.12905	0.253897	4.44689	8.71213e-06	0.00025881
TPT1P13	0.998789	1.23455	0.428697	2.87977	0.00397959	0.0273325
TRAC	354.457	2.01581	0.397955	5.06542	4.07502e-07	2.20021e-05
TRAF3IP3	55.3544	2.38326	0.344836	6.91127	4.80324e-12	1.46514e-09
TRAT1	9.77367	4.00481	0.553343	7.23749	4.57052e-13	1.8525e-10
TRAV1-2	2.37753	2.68282	0.772176	3.47436	0.000512072	0.00613409
TRAV12-1	2.07196	2.33062	0.694789	3.35443	0.000795298	0.00851342
TRAV12-2	10.7743	3.36135	0.680083	4.94256	7.71033e-07	3.62692e-05
TRAV12-3	1.91048	2.19689	0.659373	3.33179	0.000862885	0.00903754
TRAV13-1	3.4162	2.98951	0.67272	4.44391	8.83384e-06	0.000261114
TRAV13-2	1.68872	1.98391	0.649398	3.055	0.00225061	0.0180967
TRAV14DV4	2.32233	3.20428	0.702492	4.5613	5.08372e-06	0.000169771
TRAV17	3.06789	2.50414	0.63834	3.92289	8.74925e-05	0.00161091
TRAV19	6.76451	3.80143	0.694421	5.47425	4.39377e-08	3.42105e-06
TRAV2	1.36393	2.50329	0.754133	3.31943	0.000902002	0.00931533
TRAV21	3.04771	2.32236	0.609308	3.81148	0.00013814	0.00229356
TRAV22	0.920859	2.38572	0.666988	3.57685	0.000347755	0.00457916
TRAV23DV6	1.10502	2.2585	0.723579	3.12129	0.00180062	0.0153402
TRAV25	0.780405	2.09678	0.720247	2.9112	0.00360044	0.0254673
TRAV26-1	1.67829	2.60908	0.690836	3.7767	0.000158919	0.00255053
TRAV26-2	0.84016	2.74907	0.840677	3.27006	0.00107524	0.0105171
TRAV29DV5	1.9293	2.85447	0.673141	4.24052	2.23001e-05	0.000542612
TRAV3	3.00824	3.46357	0.724446	4.78099	1.74432e-06	7.06032e-05
TRAV30	1.32829	3.4055	0.951145	3.58042	0.000343046	0.00453937
TRAV35	0.546009	2.17857	0.730693	2.98152	0.00286826	0.0215658
TRAV36DV7	0.664939	2.23221	0.758008	2.94484	0.00323124	0.0234904
TRAV39	0.989634	2.04341	0.754605	2.70792	0.00677061	0.0401783
TRAV4	2.82676	4.21428	0.728925	5.7815	7.40392e-09	7.4845e-07
TRAV41	1.19331	1.9005	0.583066	3.2595	0.00111609	0.0107854
TRAV5	1.22088	2.8066	0.736136	3.81261	0.000137509	0.00228503
TRAV6	0.903478	2.6202	0.746443	3.51024	0.000447697	0.0055355
TRAV8-1	0.776499	1.84562	0.708771	2.60398	0.00921487	0.0498032
TRAV8-2	2.73033	3.68734	0.667766	5.5219	3.3535e-08	2.7562e-06
TRAV8-3	2.42086	3.20441	0.630392	5.0832	3.71131e-07	2.02602e-05
TRAV8-4	1.94087	2.34231	0.594356	3.94092	8.11706e-05	0.0015217
TRAV8-6	2.36725	2.79126	0.615995	4.53131	5.86202e-06	0.000188733
TRAV9-2	1.31415	2.22822	0.640812	3.47718	0.000506723	0.00608726
TRBC1	6.28297	2.91253	0.506728	5.74772	9.04563e-09	8.89853e-07
TRBC2	247.704	2.93652	0.414676	7.08149	1.42615e-12	5.02343e-10
TRBJ2-1	0.597076	1.6663	0.628623	2.65072	0.0080321	0.0451127
TRBJ2-3	0.977129	2.40026	0.647024	3.70969	0.000207513	0.00313006
TRBJ2-7	0.769349	2.54797	0.62037	4.10718	4.00518e-05	0.000872338
TRBV10-2	0.803155	2.84958	0.834105	3.41633	0.000634704	0.00719756
TRBV10-3	2.19722	2.28387	0.667746	3.42027	0.000625583	0.00712462
TRBV12-3	2.27027	3.94378	0.93482	4.21876	2.45648e-05	0.000588999
TRBV12-4	3.61444	4.37236	0.778781	5.61436	1.97289e-08	1.75825e-06
TRBV13	1.11099	2.59139	0.66729	3.88345	0.000102985	0.00182001
TRBV14	1.75571	3.90632	0.882295	4.42745	9.53544e-06	0.000277419
TRBV15	1.37058	2.17499	0.641952	3.38809	0.000703799	0.00775559
TRBV18	1.90567	2.76274	0.714124	3.86871	0.000109414	0.00190543
TRBV19	7.44208	2.83246	0.57794	4.90096	9.53687e-07	4.3105e-05
TRBV2	4.49966	3.43935	0.69293	4.96349	6.9238e-07	3.35682e-05
TRBV20-1	11.7891	3.07218	0.561837	5.4681	4.54897e-08	3.49597e-06
TRBV24-1	1.82153	1.77538	0.615356	2.88512	0.00391265	0.0270548
TRBV27	3.60666	4.05833	0.759237	5.34528	9.02787e-08	6.31372e-06
TRBV28	65.2824	2.9289	0.429901	6.81296	9.56112e-12	2.48153e-09
TRBV29-1	7.18546	2.8896	0.687903	4.20059	2.66217e-05	0.000630146
TRBV3-1	2.93106	2.8314	0.68405	4.13918	3.48555e-05	0.000778931
TRBV4-1	2.41065	2.29919	0.615217	3.73721	0.000186077	0.00287351
TRBV4-2	6.9145	3.65801	0.676473	5.40748	6.39182e-08	4.73988e-06
TRBV5-1	6.78049	2.89286	0.64378	4.49356	7.00432e-06	0.000217237
TRBV5-4	2.03254	2.04027	0.631562	3.23051	0.00123568	0.011666
TRBV5-6	1.95307	2.92472	0.681949	4.28876	1.7967e-05	0.000454155
TRBV6-1	1.45091	2.61151	0.75687	3.4504	0.00055975	0.00655657
TRBV6-5	3.92544	2.81171	0.660519	4.25682	2.0736e-05	0.000512133
TRBV6-6	2.67456	3.90506	0.758747	5.14672	2.65076e-07	1.55926e-05
TRBV7-3	2.84458	3.69907	0.627928	5.89091	3.84086e-09	4.32104e-07
TRBV7-6	3.19126	4.1353	0.854635	4.83867	1.30708e-06	5.52498e-05
TRBV7-9	8.4699	2.13316	0.649839	3.28259	0.00102858	0.0101921
TRBV9	7.26538	4.22263	0.681343	6.19751	5.7362e-10	8.40211e-08
TRDC	10.1462	1.78054	0.388748	4.58018	4.64584e-06	0.000156939
TRG-AS1	19.3652	2.12232	0.379966	5.58556	2.32951e-08	2.00949e-06
TRGC1	9.91524	3.54549	0.488587	7.25662	3.96874e-13	1.66268e-10
TRGC2	27.5635	3.62891	0.46843	7.74696	9.4119e-15	7.14049e-12
TRGV10	3.84101	3.28737	0.627873	5.23572	1.64341e-07	1.05478e-05
TRGV2	1.62738	3.64959	0.734932	4.96589	6.83874e-07	3.34454e-05
TRGV3	1.43747	2.40718	0.575359	4.18379	2.86694e-05	0.000667403
TRGV4	0.904632	2.56129	0.66051	3.87774	0.000105432	0.00185244
TRGV5	2.70713	1.63274	0.473141	3.45086	0.000558802	0.00654805
TRGV7	2.36441	2.56606	0.50413	5.09008	3.57915e-07	1.96619e-05
TRIM36	11.0217	1.55523	0.266186	5.84265	5.13781e-09	5.52791e-07
TRIM69	1865.73	1.11965	0.19951	5.61201	1.99986e-08	1.77187e-06
TRIML2	2.34798	1.48819	0.487792	3.05087	0.00228177	0.0182764
TRPC3	7.32474	1.32209	0.477653	2.76789	0.00564204	0.035323
TRPC6	21.5206	1.1969	0.263122	4.54883	5.39448e-06	0.00017715
TRPM2	668.394	1.27936	0.285863	4.47543	7.62587e-06	0.000233818
TRPM8	92.0527	1.29965	0.383722	3.38694	0.000706756	0.00777379
TRPV2	5159	1.28624	0.346845	3.7084	0.000208571	0.00313581
TRPV3	14.93	1.76017	0.35562	4.94958	7.4372e-07	3.52647e-05
TTBK1	9.48142	1.0463	0.348238	3.00454	0.00265981	0.0203829
TTC21B-AS1	0.674732	1.25529	0.466379	2.69158	0.00711154	0.0414941
TTC24	3.73972	2.95928	0.490815	6.02931	1.64666e-09	2.14632e-07
TWIST1	26.9626	1.3694	0.368077	3.72041	0.000198901	0.00302967
TXNDC2	1.31523	1.36919	0.450974	3.03608	0.00239678	0.0189008
TYMP	1678.07	1.22603	0.254585	4.81579	1.46622e-06	6.06749e-05
TYROBP	1454	1.16282	0.255211	4.5563	5.20617e-06	0.000172497
U1	71.5612	2.39517	0.555149	4.31446	1.59996e-05	0.00041526
UBASH3A	25.2174	2.55177	0.418276	6.10067	1.05623e-09	1.46722e-07
UBD	66.9361	4.04135	0.429671	9.4057	5.1683e-21	5.09732e-17
UBE2D3P3	2.61235	1.17546	0.396098	2.9676	0.00300137	0.0222818
UCP2	1009.08	1.14731	0.27387	4.18926	2.79868e-05	0.000655856
UGT8	33.4273	1.45577	0.366946	3.96725	7.27058e-05	0.00139237
ULBP1	25.3451	2.00277	0.422953	4.7352	2.18835e-06	8.43085e-05
UNC13C	2.99703	1.61977	0.472688	3.42672	0.000610918	0.00701345
UNC45B	1.22772	1.20011	0.42996	2.7912	0.00525122	0.0335181
UNC5B-AS1	3.26912	1.09752	0.410608	2.67291	0.00751958	0.043068
UNC5D	57.9738	1.99942	0.535222	3.73568	0.000187209	0.00288364
UNQ6494	1.81461	2.35327	0.612691	3.84088	0.000122595	0.00208348
USP30-AS1	12.1315	2.46663	0.417567	5.90715	3.48077e-09	3.94594e-07
UTS2	2.03104	2.13169	0.692247	3.07938	0.00207435	0.0170489
UTS2R	2.09605	2.41509	0.516774	4.67339	2.96268e-06	0.000108088
VAV1	141.244	1.26362	0.261098	4.83963	1.30082e-06	5.52204e-05
VAX1	8.83941	2.32043	0.579288	4.00565	6.18461e-05	0.00122156
VCAM1	161.931	1.15396	0.315343	3.65938	0.000252825	0.00364551
VCPIP1	1333.34	1.02479	0.174671	5.86695	4.43879e-09	4.88233e-07
VGF	1552.33	3.0179	0.429458	7.02722	2.10694e-12	6.92667e-10
VSTM2B	5.84917	1.50042	0.468176	3.20482	0.00135149	0.0124573
VSX1	6.44902	1.3027	0.484179	2.69054	0.00713358	0.0415838
VWC2	21.8785	1.73735	0.639438	2.717	0.00658762	0.0393687
WAS	236.316	1.24576	0.24695	5.04457	4.54549e-07	2.3931e-05
WBSCR17	31.2393	1.31971	0.417612	3.16013	0.001577	0.0139641
WDFY4	137.532	1.05794	0.262189	4.03502	5.45985e-05	0.00111334
WDR72	15.0574	2.15425	0.468217	4.60095	4.20566e-06	0.000145032
WNT1	0.554379	1.91138	0.734365	2.60277	0.00924753	0.0498571
WNT10B	11.4937	1.79794	0.366592	4.90447	9.36813e-07	4.27119e-05
WWTR1	1038.41	1.21478	0.253246	4.79684	1.6119e-06	6.59651e-05
XAF1	86.1793	1.61776	0.414544	3.9025	9.52043e-05	0.00171823
XCL1	8.88208	2.78295	0.492664	5.64878	1.61589e-08	1.48333e-06
XCL2	9.21911	2.593	0.450833	5.75157	8.84166e-09	8.7494e-07
XCR1	14.6874	2.84912	0.480603	5.92821	3.06254e-09	3.53962e-07
XIRP1	2.79524	1.36475	0.509054	2.68096	0.00734123	0.0424824
ZAP70	75.9641	2.52828	0.367305	6.88332	5.84722e-12	1.71295e-09
ZBED2	9.39512	5.08513	0.75847	6.70446	2.02153e-11	4.49723e-09
ZBP1	21.8254	2.34102	0.474644	4.93216	8.13251e-07	3.78341e-05
ZBTB12P1	3.50467	1.04577	0.366097	2.85653	0.00428297	0.0288704
ZDHHC11B	165.556	1.00532	0.302603	3.32224	0.000892992	0.00925458
ZEB1	128.026	1.10668	0.244802	4.52072	6.16292e-06	0.000196285
ZNF295-AS1	10.643	1.52268	0.354775	4.29196	1.77103e-05	0.000450958
ZNF385B	11.3702	1.87985	0.434539	4.32609	1.5178e-05	0.000399542
ZNF385D	6.56144	1.78646	0.356938	5.00497	5.58716e-07	2.84532e-05
ZNF683	15.3169	1.54642	0.436634	3.54168	0.000397586	0.00508154
ZNF80	0.950076	2.64541	0.730558	3.62109	0.000293364	0.00406751
ZNF804A	2.89094	2.34734	0.508331	4.61773	3.87962e-06	0.000135686
ZNF831	15.1717	2.98653	0.433682	6.88645	5.72019e-12	1.70959e-09

## Sheet: Table S2
Table S2. Down-regulated genes between high-risk and low-risk patients.
	baseMean	log2FoldChange	lfcSE	stat	Pvalue	Padj
AARD	28.5439	-1.32927	0.304706	-4.36247	1.28603e-05	0.000350702
ABCA17P	45.7592	-1.15797	0.26576	-4.3572	1.31738e-05	0.000356295
ABCC6P2	3.95294	-1.24111	0.394006	-3.14999	0.00163278	0.0143605
ABLIM1	2896.96	-1.14304	0.256649	-4.4537	8.44042e-06	0.000252258
AC002454.1	4.69257	-1.47648	0.375619	-3.9308	8.46652e-05	0.00157044
AC002456.2	1.03723	-1.83203	0.584921	-3.1321	0.00173563	0.0149884
AC004510.3	1.03248	-1.54704	0.525754	-2.94253	0.00325545	0.0235795
AC005329.7	5.82819	-1.14506	0.336637	-3.40146	0.000670281	0.00748953
AC005537.2	4.97248	-2.62642	0.798281	-3.29009	0.00100155	0.0100148
AC006273.4	4.49289	-1.02258	0.303848	-3.36542	0.000764279	0.00825309
AC006946.17	0.891231	-2.45058	0.885933	-2.7661	0.00567309	0.0354349
AC007326.1	1.79852	-2.88277	0.801071	-3.59864	0.000319882	0.00431987
AC007750.5	2.71938	-2.70639	0.729657	-3.70912	0.00020798	0.00313167
AC007879.6	0.710834	-2.06718	0.782205	-2.64276	0.00822323	0.045942
AC011239.1	2.92804	-1.65217	0.557291	-2.96464	0.00303038	0.0224213
AC012456.4	1.64152	-1.39627	0.355777	-3.92455	8.68917e-05	0.00160284
AC013463.2	4.37632	-1.47807	0.542389	-2.72512	0.00642787	0.0386875
AC016582.2	9.28239	-1.33159	0.472413	-2.8187	0.0048219	0.0314321
AC016757.3	160.604	-1.05829	0.332188	-3.18582	0.00144343	0.0130646
AC053503.4	3.86087	-1.06964	0.365861	-2.92361	0.00345993	0.0247097
AC073316.1	1.35112	-1.58951	0.501155	-3.1717	0.0015155	0.0135836
AC073957.15	1.73705	-1.20227	0.405553	-2.96453	0.00303145	0.0224227
AC074183.3	39.9171	-1.34061	0.38037	-3.5245	0.000424289	0.00535118
AC074391.1	7.43503	-1.1361	0.320154	-3.54861	0.00038727	0.00498631
AC079145.4	7.16312	-1.06266	0.259061	-4.10196	4.09664e-05	0.000888647
AC079610.2	2.95358	-1.25117	0.359701	-3.47836	0.000504484	0.00607269
AC079630.4	8.42189	-1.49067	0.367866	-4.05223	5.07325e-05	0.00105044
AC079776.1	8.98813	-1.03393	0.296262	-3.48991	0.00048319	0.00588339
AC090945.1	11.5257	-1.01683	0.36176	-2.81078	0.00494208	0.03199
AC091633.2	1.03735	-1.12075	0.399169	-2.80771	0.00498954	0.0322549
AC092798.2	2.31109	-1.24514	0.325543	-3.8248	0.000130879	0.00219651
AC108142.1	11.2618	-1.92489	0.473417	-4.06596	4.78357e-05	0.0010038
AC140725.4	1.07098	-1.24647	0.450448	-2.76717	0.00565449	0.0353759
ACKR2	26.5145	-1.03645	0.261	-3.97106	7.1554e-05	0.00137387
ACOT12	15.787	-1.50811	0.496358	-3.03836	0.00237873	0.0188111
ACOX2	186.286	-1.46639	0.449545	-3.26195	0.00110649	0.0107235
ACSM3	51.0537	-1.26308	0.296437	-4.26086	2.03644e-05	0.000504219
ACVR2B-AS1	126.013	-1.03632	0.301591	-3.43618	0.000589989	0.00682698
ADAD2	17.1335	-2.6514	0.483855	-5.47975	4.25938e-08	3.34288e-06
ADAMTSL4	1114.53	-1.02126	0.240261	-4.25062	2.13178e-05	0.000522261
ADORA2A-AS1	25.064	-1.96542	0.395951	-4.96379	6.91292e-07	3.35682e-05
AF186192.6	9.97237	-2.25798	0.466389	-4.84141	1.28919e-06	5.49633e-05
AGBL4	24.3056	-1.30096	0.346402	-3.75563	0.000172908	0.00272095
AGRP	1.78605	-1.27302	0.470604	-2.70507	0.00682893	0.0403995
AL035610.2	25.061	-4.60218	0.832945	-5.52519	3.2913e-08	2.71262e-06
AL050327.1	1.22161	-1.99547	0.758242	-2.63171	0.00849571	0.0470468
AL360294.1	0.789437	-1.58157	0.583708	-2.70952	0.00673813	0.0400403
ALDH1L1	2348.18	-1.35269	0.336795	-4.01636	5.91045e-05	0.00118321
ALDH1L1-AS2	28.494	-2.19609	0.423152	-5.18985	2.10469e-07	1.29198e-05
ALG1L12P	14.6572	-1.09624	0.269849	-4.0624	4.8571e-05	0.00101308
ALOX12B	2.39299	-1.20263	0.414338	-2.90254	0.0037015	0.0259711
ALX3	9.13154	-1.52905	0.470467	-3.25006	0.00115379	0.0110695
ALX4	21.254	-1.50358	0.4243	-3.54367	0.0003946	0.00506527
ANK3	123.172	-1.3433	0.362715	-3.70345	0.000212683	0.00318912
ANKRD45	10.8855	-1.5949	0.317895	-5.01708	5.24628e-07	2.6996e-05
ANKRD65	370.071	-2.02704	0.37569	-5.39552	6.83253e-08	4.9671e-06
AP001596.6	3.85117	-2.04299	0.399192	-5.1178	3.09126e-07	1.75892e-05
AP001627.1	7.0036	-1.67683	0.443006	-3.78511	0.000153644	0.0024828
AP004782.1	12.4538	-1.7104	0.32944	-5.19184	2.08225e-07	1.28086e-05
AP006621.8	5.87516	-1.16499	0.304099	-3.83097	0.000127641	0.00214949
AQP7	70.4631	-1.11795	0.318109	-3.51436	0.00044082	0.00547794
ARAP3	561.613	-1.02577	0.237462	-4.31971	1.56234e-05	0.000408361
ARHGEF35	93.0782	-1.02107	0.3294	-3.0998	0.00193653	0.0161637
ASB10	218.022	-1.92838	0.577994	-3.33633	0.000848909	0.00893226
ASIC4	55.7772	-1.01397	0.365444	-2.77462	0.00552662	0.0348215
ASXL3	21.6693	-4.38525	0.647564	-6.77192	1.27088e-11	3.0822e-09
ATAD3C	340.503	-1.26283	0.404515	-3.12184	0.00179727	0.015325
ATP11AUN	38.8952	-2.31917	0.45499	-5.09719	3.44729e-07	1.91367e-05
ATP4B	13.8638	-2.15782	0.442663	-4.87464	1.09009e-06	4.75715e-05
ATP6V1G2	139.155	-1.20538	0.321497	-3.74927	0.000177351	0.00277643
AZGP1	2219.26	-1.44797	0.346426	-4.17975	2.91832e-05	0.000675643
B3GALT5	24.3699	-1.32659	0.458719	-2.89194	0.00382871	0.0266362
B3GALT5-AS1	6.55119	-1.42992	0.545512	-2.62123	0.0087612	0.0481148
B3GAT1	183.573	-1.25495	0.350238	-3.58312	0.000339516	0.00450072
BAALC-AS1	72.9339	-1.17613	0.242399	-4.85202	1.22211e-06	5.24056e-05
BEX1	247.444	-1.41545	0.445066	-3.18031	0.00147118	0.0132555
BLACAT1	8.974	-1.33994	0.478383	-2.80098	0.0050947	0.0327192
BTC	33.4399	-1.15995	0.378324	-3.06603	0.00216919	0.0175937
BX842568.2	5.8342	-1.15733	0.396193	-2.92114	0.00348758	0.0248891
C10orf107	17.8797	-2.31197	0.43946	-5.26094	1.43318e-07	9.39652e-06
C10orf82	22.8263	-1.33949	0.389422	-3.4397	0.000582366	0.00676523
C17orf64	2.83257	-1.23741	0.422931	-2.9258	0.00343576	0.0245727
C17orf77	1.79051	-2.05477	0.788694	-2.60528	0.00917987	0.0496734
C19orf81	28.2805	-1.30196	0.366131	-3.556	0.000376537	0.00486293
C1orf64	1.78459	-1.26887	0.418487	-3.03205	0.00242897	0.0190936
C21orf62-AS1	29.2851	-1.03062	0.205167	-5.02334	5.07798e-07	2.64986e-05
C3orf67	34.3163	-1.09721	0.246343	-4.45401	8.42808e-06	0.000252144
C4orf19	74.7155	-1.56751	0.464402	-3.37533	0.000737278	0.00802302
C5orf66-AS1	1.63228	-2.11383	0.712332	-2.96748	0.00300248	0.0222818
C6orf223	14.1598	-1.16156	0.440299	-2.63812	0.00833683	0.0464189
CA4	150.646	-1.06578	0.348665	-3.05674	0.00223759	0.018025
CACNG8	29.7615	-1.11705	0.403775	-2.76651	0.00566598	0.0354201
CADPS2	739.27	-1.17452	0.242889	-4.83562	1.32733e-06	5.60094e-05
CAPN9	33.5438	-1.30586	0.282291	-4.62592	3.72941e-06	0.000131835
CCDC13	70.7508	-1.17181	0.266757	-4.39281	1.11895e-05	0.00031471
CCDC155	7.88299	-1.80867	0.576311	-3.13836	0.00169898	0.0147594
CCDC173	4.72446	-1.0739	0.349487	-3.07279	0.00212065	0.0172996
CCDC181	25.6727	-1.02823	0.337165	-3.04964	0.00229114	0.0183266
CCDC27	5.87587	-1.17008	0.314542	-3.71995	0.000199258	0.00303119
CCDC54	1.08327	-1.50259	0.452052	-3.32394	0.000887564	0.00921078
CDC20P1	10.7093	-1.23953	0.343288	-3.61075	0.000305319	0.00418988
CDH7	20.2554	-1.37795	0.489208	-2.81669	0.00485219	0.031567
CDHR5	16.1135	-1.77265	0.420671	-4.21386	2.5104e-05	0.000600953
CEACAMP11	0.716495	-2.35459	0.850352	-2.76896	0.00562355	0.0352595
CEBPA-AS1	71.8054	-1.00724	0.215469	-4.67464	2.94476e-06	0.0001077
CECR7	45.2402	-2.18088	0.4907	-4.44443	8.81266e-06	0.000260749
CELF5	182.88	-1.34263	0.308968	-4.34552	1.38945e-05	0.000373058
CELSR3	89.1305	-1.04308	0.244293	-4.26979	1.95654e-05	0.00048647
CENPVP3	2.69326	-1.3331	0.453539	-2.93932	0.00328931	0.0237782
CES3	82.4857	-1.71596	0.354586	-4.83932	1.30281e-06	5.52259e-05
CETN4P	3.52188	-1.10052	0.291732	-3.77237	0.000161701	0.00258478
CETP	226.093	-1.15821	0.326729	-3.54487	0.000392809	0.00504446
CFAP221	8.1541	-1.63088	0.407643	-4.00075	6.31425e-05	0.00124137
CFAP43	27.491	-1.06236	0.280324	-3.78974	0.000150807	0.00244765
CFAP58-AS1	30.7769	-1.24813	0.370967	-3.36454	0.000766719	0.0082734
CFAP77	9.94399	-1.50878	0.384964	-3.91927	8.88176e-05	0.00162556
CH25H	43.3781	-1.15317	0.37088	-3.10929	0.00187539	0.0158088
CH507-152C13.3	6.02591	-2.96525	1.07665	-2.75414	0.00588465	0.0364029
CHAD	14.7848	-1.265	0.362968	-3.48516	0.00049185	0.00596428
CHADL	937.548	-1.5772	0.369297	-4.27083	1.94745e-05	0.000485011
CHGB	602.642	-2.53802	0.436504	-5.81443	6.08407e-09	6.45216e-07
CHL1	1142.26	-2.34815	0.460542	-5.09868	3.42035e-07	1.90946e-05
CHL1-AS1	3.24362	-2.52879	0.672436	-3.76064	0.000169478	0.0026787
CHP2	5.78483	-1.64776	0.53707	-3.06805	0.00215464	0.0175045
CHRNB2	236.421	-1.2153	0.344764	-3.52501	0.000423463	0.00534304
CHRND	5.95822	-1.54242	0.362523	-4.25468	2.09353e-05	0.000516385
CIDEC	5.78184	-1.40814	0.295785	-4.76069	1.92928e-06	7.64169e-05
CILP2	152.916	-1.39356	0.31596	-4.41055	1.03111e-05	0.000294199
CKMT1A	11.8305	-1.33417	0.447805	-2.97935	0.00288859	0.0216978
CKMT1B	12.0462	-1.40283	0.455872	-3.07725	0.00208923	0.0171463
CLCN3P1	1.96337	-1.01208	0.368853	-2.74387	0.00607196	0.0371107
CLDN10	9.53887	-1.84497	0.449555	-4.104	4.06062e-05	0.000882196
CLDN10-AS1	4.4221	-1.74832	0.608342	-2.87391	0.00405431	0.0277169
CLEC11A	947.579	-1.17346	0.361532	-3.24581	0.00117117	0.0111854
CLUHP3	171.211	-1.06032	0.268591	-3.9477	7.89068e-05	0.0014879
CLUL1	115.743	-1.28081	0.298939	-4.28451	1.83139e-05	0.000461168
CMTM5	103.689	-1.46314	0.521474	-2.80578	0.00501952	0.0324062
CNTD2	8.80082	-1.72539	0.3449	-5.00257	5.657e-07	2.86609e-05
CNTN3	136.295	-2.14204	0.511589	-4.18703	2.82632e-05	0.000660025
COL11A1	902.736	-1.30015	0.418039	-3.11012	0.00187014	0.0157835
COL2A1	519.641	-1.88051	0.452727	-4.15374	3.27084e-05	0.00073989
COL6A6	7.26129	-1.00128	0.299163	-3.34693	0.000817113	0.00869667
COX6A2	516.281	-1.50969	0.426065	-3.54334	0.000395094	0.00506544
COX6CP16	1.36612	-2.03695	0.620244	-3.2841	0.00102307	0.0101561
CPAMD8	270.768	-1.02852	0.364652	-2.82054	0.00479423	0.0313114
CPED1	237.579	-1.20654	0.430861	-2.8003	0.00510549	0.0327611
CPN2	2.43018	-2.48526	0.877571	-2.83198	0.00462604	0.0305116
CPS1	502.741	-1.35427	0.425316	-3.18414	0.00145183	0.0131229
CRB3	20.3139	-1.54678	0.281756	-5.48979	4.02419e-08	3.19133e-06
CRYBB2	16.7263	-2.23622	0.515265	-4.33995	1.42516e-05	0.000379547
CTB-30L5.1	2.50621	-1.72423	0.365864	-4.71275	2.44393e-06	9.25878e-05
CTB-39G8.2	1.53013	-1.36041	0.511737	-2.65842	0.00785089	0.0443653
CTC-281F24.1	1.44895	-1.29979	0.467554	-2.77998	0.00543619	0.0343761
CTC-347C20.2	1.16322	-2.51994	0.663437	-3.79831	0.000145684	0.00238677
CTC-498J12.1	4.95296	-1.06561	0.373065	-2.85637	0.00428519	0.028875
CTC-559E9.12	4.1728	-1.14855	0.329344	-3.4874	0.000487736	0.00592168
CTC-559E9.9	1.11623	-1.77274	0.467932	-3.78846	0.000151584	0.00245874
CTD-2005H7.1	0.703939	-2.29119	0.645787	-3.54791	0.000388304	0.00499745
CTD-2195M15.1	5.37891	-1.77782	0.653701	-2.71963	0.0065356	0.0391405
CTD-2224J9.8	1.78609	-1.0335	0.347851	-2.97109	0.00296741	0.0221247
CTD-2337A12.1	3.23334	-1.5076	0.342025	-4.40785	1.04402e-05	0.000297024
CTD-2377O17.1	5.15958	-1.30766	0.458358	-2.85293	0.00433185	0.0291033
CTD-2396E7.11	15.1009	-1.60931	0.308673	-5.21363	1.85181e-07	1.16826e-05
CTD-2527I21.15	10.3122	-1.47341	0.386629	-3.81091	0.000138456	0.00229632
CTD-2527I21.5	2.37902	-1.57147	0.519165	-3.02692	0.00247058	0.0193283
CTD-2550O8.5	2.81872	-1.12569	0.242691	-4.63837	3.51162e-06	0.000124954
CTD-2554C21.2	43.7552	-1.35959	0.461765	-2.94434	0.00323644	0.0235051
CTD-2554C21.3	47.0515	-1.33246	0.409974	-3.2501	0.00115364	0.0110695
CTD-3076O17.2	2.4362	-1.00072	0.384462	-2.6029	0.00924394	0.0498571
CTD-3099C6.5	2.65878	-1.14617	0.391737	-2.92587	0.00343498	0.0245727
CTD-3193K9.11	5.10199	-1.24753	0.370952	-3.36306	0.000770846	0.00830885
CTF1	378.87	-1.07816	0.371883	-2.8992	0.00374116	0.0261686
CTSLP2	8.62579	-1.66133	0.400362	-4.14958	3.33085e-05	0.000749454
CTSLP8	12.5813	-2.61161	0.690543	-3.78197	0.000155593	0.00250776
CUZD1	11.8884	-1.34685	0.372043	-3.62014	0.000294441	0.00407861
CYP11A1	167.562	-1.06172	0.328731	-3.22975	0.00123897	0.0116933
CYP19A1	49.7564	-1.51604	0.33335	-4.54788	5.41879e-06	0.000177366
CYP2C8	3.71112	-1.02955	0.38238	-2.69246	0.0070926	0.0414326
CYP2J2	132.351	-1.19856	0.271624	-4.41255	1.02159e-05	0.000292179
CYP39A1	27.8087	-1.67506	0.387323	-4.3247	1.52743e-05	0.000401589
CYP8B1	1.24728	-1.26845	0.379341	-3.34382	0.000826321	0.00874747
CYYR1-AS1	1.91035	-1.81135	0.555001	-3.26369	0.00109973	0.0106895
DCAF12L1	47.0838	-1.71419	0.449568	-3.81296	0.000137314	0.00228378
DCAF13P2	6.94508	-1.10849	0.273677	-4.05035	5.11415e-05	0.00105743
DCDC1	5.72636	-1.05872	0.335055	-3.15984	0.00157856	0.0139641
DCDC2	100.004	-1.08874	0.329807	-3.30113	0.000962956	0.00976421
DDX43	63.9128	-2.25984	0.752105	-3.00468	0.00265857	0.0203787
DENND2A	962.845	-1.01618	0.333889	-3.04347	0.00233863	0.0185909
DES	47.9072	-1.36456	0.466655	-2.92414	0.00345411	0.0246741
DGKE	164.779	-1.04872	0.280474	-3.73909	0.000184687	0.00285652
DKFZP434A062	18.4335	-1.08898	0.346675	-3.14121	0.0016825	0.0146546
DKFZp434J0226	3.13112	-2.16983	0.588426	-3.68751	0.00022646	0.00334857
DLL3	493.782	-1.69191	0.428158	-3.95162	7.76255e-05	0.00146666
DNAH2	76.5266	-2.62508	0.451671	-5.81194	6.17547e-09	6.50248e-07
DNAI1	8.80801	-1.41496	0.366744	-3.85818	0.000114236	0.00197431
DNALI1	235.258	-2.09245	0.358696	-5.83349	5.42791e-09	5.81888e-07
DPP10-AS1	7.54193	-1.63874	0.599224	-2.73477	0.00624238	0.0378137
DPY19L2P4	11.7858	-1.18611	0.309982	-3.82637	0.000130048	0.0021838
DUBR	199.52	-1.34608	0.301928	-4.45827	8.26246e-06	0.000248951
DUOX1	431.157	-1.41282	0.317259	-4.45319	8.46051e-06	0.000252603
DUOX2	12.978	-1.33769	0.409783	-3.26438	0.00109702	0.0106702
DUOXA1	49.8291	-1.54326	0.41672	-3.70336	0.000212766	0.00318912
DUSP27	20.0639	-1.09756	0.378426	-2.90034	0.0037276	0.0261007
DUSP5P2	0.673697	-1.64994	0.60016	-2.74917	0.00597458	0.0367441
DUX4L26	1.05852	-1.91729	0.66792	-2.87054	0.00409765	0.027922
EDN3	153.521	-1.61731	0.531133	-3.04502	0.00232662	0.0185303
EEF1A1P42	1.26904	-1.11513	0.387026	-2.88128	0.00396068	0.0272722
EFS	738.015	-1.22457	0.38499	-3.18079	0.00146874	0.013241
EIF1B-AS1	27.9255	-1.03272	0.203214	-5.08195	3.73583e-07	2.03565e-05
EIF4BP8	1.17301	-1.09588	0.375844	-2.91577	0.00354807	0.0251812
ENPP2	3965.06	-1.74513	0.330419	-5.28156	1.2809e-07	8.57448e-06
ENPP5	42.0231	-1.03986	0.379776	-2.73808	0.00617999	0.0375832
ENPP6	7.6447	-1.19751	0.432005	-2.77199	0.00557151	0.0350298
ENPP7P2	3.40984	-1.58823	0.440908	-3.60218	0.000315554	0.00428112
EPB41L4A	157.725	-1.13699	0.271937	-4.18106	2.9015e-05	0.000672803
EPCAM	41.2122	-1.7157	0.506373	-3.38821	0.000703494	0.00775559
EPHB3	627.484	-1.05769	0.291875	-3.62378	0.000290324	0.0040367
EPHX4	23.5064	-1.07445	0.39764	-2.70207	0.0068909	0.0406394
EPPK1	60.7598	-1.23323	0.301233	-4.09394	4.24101e-05	0.000915266
ERBB4	56.4818	-1.29515	0.387015	-3.34651	0.000818347	0.00870062
ERC2	10.9299	-1.5755	0.386584	-4.07543	4.59289e-05	0.000972063
ERVFRD-1	35.7998	-1.75251	0.335486	-5.2238	1.7529e-07	1.11298e-05
ESRRG	54.1551	-1.47142	0.523302	-2.8118	0.00492649	0.031917
EXPH5	20.7835	-1.45676	0.344824	-4.22466	2.393e-05	0.000575175
F10	256.586	-1.09923	0.333946	-3.29165	0.000996011	0.00998643
FAM129A	3850.09	-1.05017	0.290085	-3.62023	0.000294341	0.00407861
FAM198A	28.2282	-1.116	0.394185	-2.83115	0.00463812	0.0305777
FAM24B	25.8766	-1.61885	0.36888	-4.38854	1.14113e-05	0.000319431
FAM66D	8.17606	-1.05592	0.30815	-3.42665	0.000611081	0.00701345
FAM86KP	4.43695	-1.22363	0.312212	-3.91922	8.88376e-05	0.00162556
FAP	108.094	-2.3622	0.426254	-5.54176	2.99441e-08	2.50279e-06
FBP2	60.036	-2.02152	0.573058	-3.52759	0.000419355	0.00530478
FBP2P1	6.59409	-3.3562	0.752146	-4.46216	8.11368e-06	0.000245468
FBXO17	861.267	-1.02811	0.328011	-3.13439	0.00172214	0.0148947
FERMT1	25.4213	-1.89899	0.403262	-4.70908	2.48839e-06	9.38493e-05
FLJ31356	1.10107	-1.70668	0.511577	-3.33612	0.000849578	0.00893612
FOXN1	1.48136	-2.29109	0.800941	-2.8605	0.0042297	0.0286119
FXYD1	70.5033	-2.45089	0.392916	-6.23769	4.44076e-10	6.66971e-08
FXYD3	155.048	-1.96259	0.460837	-4.25874	2.05583e-05	0.00050817
FZD10	21.7638	-1.24077	0.329469	-3.76596	0.000165911	0.00263354
GABRB1	11.3075	-2.475	0.568794	-4.35131	1.35325e-05	0.000364995
GABRP	72.7657	-1.23738	0.396551	-3.12035	0.00180636	0.0153759
GALNTL6	265.984	-2.03311	0.488201	-4.1645	3.12032e-05	0.000712377
GAP43	41.8477	-1.3544	0.439674	-3.08047	0.00206675	0.0169958
GBX1	3.32971	-3.20685	0.63006	-5.08975	3.58528e-07	1.96619e-05
GCSAML-AS1	3.47689	-1.79408	0.599714	-2.99156	0.00277554	0.0210248
GDAP1L1	52.2222	-1.10451	0.37814	-2.92089	0.0034903	0.0248966
GDNF-AS1	207.68	-1.24464	0.467687	-2.66126	0.00778482	0.0441259
GFRA3	36.5896	-1.91575	0.418238	-4.58053	4.63798e-06	0.000156939
GJB6	451.183	-1.37296	0.4864	-2.8227	0.00476211	0.0311729
GJC3	53.5046	-1.23687	0.270881	-4.56609	4.96907e-06	0.000166506
GOLGA2P5	41.3758	-1.08408	0.324123	-3.34466	0.000823846	0.00873577
GPR1	5.50578	-1.69677	0.467554	-3.62903	0.000284484	0.00398876
GPR156	79.1987	-1.05793	0.311364	-3.39773	0.000679482	0.00755808
GPR158	17.0718	-1.05325	0.388039	-2.71428	0.00664203	0.0396298
GPR17	17.6947	-1.49669	0.415915	-3.59856	0.000319987	0.00431987
GPR61	40.5523	-1.49003	0.344885	-4.32038	1.55762e-05	0.000407487
GPRIN2	3.503	-2.14793	0.546321	-3.93163	8.43734e-05	0.00156713
GRB7	17.9774	-2.31093	0.48446	-4.77011	1.84125e-06	7.36203e-05
GRIK3	654.262	-1.94777	0.486528	-4.00341	6.24365e-05	0.00123076
GSTM5	53.4479	-1.32723	0.378015	-3.51106	0.000446321	0.0055231
GSTO2	503.098	-1.55343	0.34875	-4.45429	8.41714e-06	0.000252071
HABP2	4.37623	-1.56333	0.473567	-3.30119	0.00096276	0.00976421
HCG23	3.15511	-1.44059	0.406867	-3.54069	0.000399075	0.00509837
HCN1	27.035	-1.18149	0.404942	-2.91769	0.0035264	0.0250574
HEPACAM	1.93643	-1.90976	0.602998	-3.16711	0.00153964	0.0137255
HEY2	82.4852	-1.03712	0.286094	-3.62511	0.000288841	0.00402554
HFE	203.731	-1.44722	0.305222	-4.74154	2.12101e-06	8.26829e-05
HHATL-AS1	19.0184	-1.11191	0.411657	-2.70105	0.00691199	0.0407232
HLA-K	56.5653	-1.30458	0.275848	-4.72933	2.25261e-06	8.63346e-05
HLA-V	119.351	-1.42479	0.365972	-3.89316	9.89465e-05	0.00177432
HMCN1	2421.15	-1.29953	0.423092	-3.07152	0.00212974	0.0173567
HNRNPLP2	58.6319	-1.01418	0.272081	-3.72748	0.000193404	0.00295427
HPDL	922.455	-1.05069	0.308078	-3.41049	0.000648469	0.00732045
HPSE2	230.589	-1.48239	0.484233	-3.06133	0.00220358	0.0178287
HRASLS	132.739	-1.03925	0.29847	-3.48192	0.000497834	0.00601215
HS3ST5	10.3323	-1.14414	0.427171	-2.67842	0.00739705	0.0426719
HYAL1	197.246	-1.52219	0.333485	-4.56447	5.00748e-06	0.000167414
HYDIN	23.9518	-1.29327	0.353796	-3.65541	0.000256771	0.00369161
IFNL4	5.4395	-1.15581	0.372464	-3.10315	0.00191469	0.0160352
IL12RB2	617.737	-1.10503	0.393877	-2.80553	0.0050234	0.0324242
IL1RAPL1	2.46744	-1.93092	0.459073	-4.20612	2.59796e-05	0.000617418
INHBC	4.75065	-1.06161	0.285972	-3.71229	0.000205392	0.00310376
IRF6	200.64	-1.67375	0.413831	-4.04452	5.24294e-05	0.00107803
IZUMO2	2.18349	-2.45175	0.521792	-4.69872	2.61801e-06	9.75589e-05
JPH4	109.13	-1.08063	0.346773	-3.11625	0.00183164	0.0155358
KAAG1	5.27142	-1.02399	0.378828	-2.70304	0.00687075	0.0405448
KCNA5	204.844	-1.53631	0.305965	-5.02117	5.13566e-07	2.66678e-05
KCNE4	1321.11	-1.01981	0.282943	-3.6043	0.000313	0.00426087
KCNK2	434.105	-1.29177	0.400536	-3.22511	0.00125922	0.0118166
KCNQ5-IT1	3.92303	-1.42068	0.420101	-3.38176	0.000720222	0.00789638
KDF1	41.5621	-1.42836	0.439161	-3.25247	0.00114405	0.0109904
KIAA0895	58.8243	-1.0345	0.247	-4.18825	2.81114e-05	0.000656998
KIAA1217	1101.68	-1.28557	0.248789	-5.16732	2.37472e-07	1.43102e-05
KIF6	386.064	-1.4993	0.312619	-4.79593	1.61923e-06	6.61737e-05
KLC3	478.581	-1.00728	0.337577	-2.98385	0.00284649	0.0214633
KLHL2P1	4.18722	-1.24305	0.320351	-3.88028	0.000104335	0.00183754
KLHL32	23.1915	-1.20325	0.290975	-4.13524	3.54579e-05	0.000790515
KLHL34	12.6438	-1.85057	0.355119	-5.21112	1.87703e-07	1.17941e-05
KLRF1	20.3569	-1.32563	0.428075	-3.09672	0.00195674	0.0162949
KREMEN2	176.669	-1.33534	0.327168	-4.08152	4.47424e-05	0.000953773
KRT15	7.68387	-1.60207	0.534431	-2.99771	0.00272012	0.0207241
KRT18P34	5.22278	-1.58038	0.314913	-5.01845	5.20891e-07	2.68504e-05
KRT8	881.329	-1.02774	0.345944	-2.97083	0.00296998	0.0221349
KRT8P3	3.02421	-1.29565	0.430355	-3.01065	0.00260691	0.020113
KRTAP5-6	1.401	-1.59208	0.609213	-2.61334	0.00896608	0.0488843
KYNU	198.46	-1.85724	0.428148	-4.33784	1.43892e-05	0.000382523
L1CAM	4011.36	-1.35635	0.419447	-3.23366	0.00122216	0.0115568
LDHC	150.913	-1.61132	0.4495	-3.58469	0.000337477	0.00448373
LECT1	8.66775	-1.9077	0.54751	-3.48431	0.000493408	0.00597339
LEKR1	25.0428	-1.24234	0.374169	-3.32027	0.000899308	0.0093085
LGI4	580.76	-2.77913	0.36739	-7.56453	3.89256e-14	2.13284e-11
LINC00113	1.93599	-2.75036	0.975609	-2.81912	0.00481559	0.0314061
LINC00322	112.718	-1.76343	0.372451	-4.73466	2.1942e-06	8.44239e-05
LINC00365	4.53932	-1.68543	0.353134	-4.77278	1.81704e-06	7.28488e-05
LINC00518	1893.6	-1.10166	0.318687	-3.45688	0.00054646	0.00643914
LINC00621	0.728336	-2.4311	0.742917	-3.27237	0.0010665	0.0104523
LINC00664	3.30292	-1.26407	0.434038	-2.91234	0.00358728	0.0254038
LINC00689	433.893	-1.14947	0.32015	-3.59041	0.000330164	0.00441831
LINC00857	20.734	-1.30007	0.466088	-2.78933	0.00528171	0.033651
LINC00866	2.07755	-1.31973	0.385431	-3.42405	0.000616947	0.00705069
LINC00881	2.43365	-1.7097	0.53511	-3.19504	0.00139811	0.0127795
LINC00882	23.454	-1.2818	0.294898	-4.34658	1.38274e-05	0.000371595
LINC00884	23.8103	-1.8327	0.303902	-6.03055	1.63399e-09	2.14632e-07
LINC00891	2.48586	-1.55265	0.549082	-2.82772	0.00468802	0.0307881
LINC01018	6.69866	-1.24549	0.465959	-2.67296	0.00751844	0.043068
LINC01057	207.551	-1.29149	0.281108	-4.59429	4.34232e-06	0.000148732
LINC01102	14.2559	-1.49328	0.413579	-3.61062	0.000305465	0.00418988
LINC01115	1.7152	-3.45772	1.15209	-3.00126	0.00268868	0.0205138
LINC01152	88.7573	-1.02656	0.325921	-3.14973	0.00163421	0.0143651
LINC01267	0.847281	-2.15669	0.542889	-3.97262	7.10871e-05	0.00136757
LINC01354	4.97841	-1.29348	0.445677	-2.90228	0.00370461	0.0259868
LINC01460	10.4303	-1.04057	0.376067	-2.76699	0.00565765	0.0353759
LINC01562	3.86277	-1.07073	0.304241	-3.51934	0.000432624	0.00541476
LINC01608	3.9498	-2.16424	0.596091	-3.63073	0.000282626	0.00397072
LINGO2	60.3702	-2.04259	0.382159	-5.34488	9.04765e-08	6.31372e-06
LINGO4	5.27073	-2.30276	0.670343	-3.4352	0.000592115	0.0068489
LIPH	29.7866	-1.86538	0.427774	-4.36067	1.29667e-05	0.000352628
LMO7DN	2.25775	-2.74659	0.721029	-3.80927	0.000139379	0.00230699
LOC401913	1.60735	-1.28208	0.463741	-2.76464	0.00569861	0.0355354
LONRF2	318.606	-1.04555	0.375383	-2.7853	0.00534787	0.0339555
LPL	462.023	-1.07186	0.270074	-3.96876	7.22468e-05	0.00138448
LRRC37A11P	2.74336	-1.20658	0.402504	-2.99768	0.00272043	0.0207241
LRRC3C	1.16765	-1.76229	0.481361	-3.66105	0.000251184	0.00362892
LRRIQ1	7.05979	-1.26433	0.451631	-2.79947	0.00511866	0.0328313
LRRK2	279.676	-1.36248	0.312409	-4.36121	1.29342e-05	0.000352069
LRRN1	181.509	-1.26311	0.370689	-3.40748	0.000655657	0.00737493
MAATS1	29.6134	-1.63314	0.378188	-4.31834	1.57208e-05	0.000410097
MAG	75.1857	-1.52498	0.503082	-3.03127	0.00243524	0.0191327
MAGEE2	2.78686	-1.89083	0.538408	-3.51189	0.000444928	0.00551509
MALRD1	4.0636	-2.26966	0.515706	-4.40107	1.0772e-05	0.000305582
MAMSTR	265.691	-1.16309	0.341845	-3.40239	0.000668	0.00746968
MANEAL	294.888	-1.03989	0.300193	-3.46408	0.000532051	0.00629521
MAOA	92.948	-1.13978	0.322015	-3.53953	0.000400843	0.00510773
MAP1LC3C	137.287	-1.62364	0.444985	-3.64874	0.000263527	0.0037594
MAP6	210.485	-1.17128	0.26352	-4.44474	8.79989e-06	0.000260632
2019-03-02	430.57	-1.01393	0.213936	-4.73942	2.14331e-06	8.30584e-05
MAST4-AS1	3.43124	-1.40227	0.388857	-3.60613	0.000310802	0.00424366
MCF2	367.763	-1.39842	0.423788	-3.2998	0.00096752	0.00980377
ME3	280.296	-1.46192	0.323358	-4.52105	6.15351e-06	0.000196196
MEGF10	356.534	-1.81616	0.500937	-3.62553	0.00028837	0.00402277
MEST	232.003	-1.08261	0.279964	-3.86697	0.000110197	0.0019157
METTL21C	4.62952	-1.14101	0.379661	-3.00535	0.00265277	0.0203447
MID1	721.328	-1.23204	0.282071	-4.36783	1.25485e-05	0.000344572
MIR219A1	3.19073	-1.54499	0.316081	-4.88796	1.01885e-06	4.5264e-05
MLIP	1521.32	-1.28999	0.3725	-3.46307	0.00053405	0.00631301
MPPED2	312.828	-1.47868	0.437851	-3.37713	0.000732467	0.00799843
MRGPRF	140.12	-1.03359	0.291097	-3.55069	0.000384229	0.00495362
MRGPRF-AS1	0.909335	-1.71236	0.568317	-3.01304	0.00258648	0.019997
MTNR1A	5.20078	-1.63502	0.443143	-3.6896	0.000224608	0.00332709
MTUS1	1216.94	-1.0436	0.325928	-3.20195	0.00136502	0.0125507
MUC20	21.9247	-1.00619	0.321978	-3.12503	0.00177785	0.0152164
MUC7	255.168	-3.91369	0.648796	-6.03224	1.61703e-09	2.13592e-07
MYH7	130.509	-1.11866	0.311893	-3.58667	0.000334924	0.00445982
MYO7B	399.771	-1.70371	0.500446	-3.40439	0.000663125	0.0074292
MYOC	12.2909	-1.72896	0.631453	-2.73807	0.00618012	0.0375832
MYOM1	306.778	-3.11946	0.352325	-8.85394	8.44843e-19	3.12465e-15
NAALAD2	38.4143	-1.69261	0.354741	-4.7714	1.82951e-06	7.32499e-05
NAALADL1	309.614	-1.0065	0.31721	-3.17299	0.0015088	0.0135415
NAP1L2	152.743	-1.03869	0.353436	-2.93883	0.00329453	0.0238101
NAP1L4P1	14.7423	-1.19207	0.440029	-2.70907	0.00674725	0.040078
NAV3	157.105	-1.04602	0.276858	-3.77817	0.000157986	0.00253911
NEDD9	2525.06	-1.0434	0.29339	-3.55635	0.000376038	0.00486073
NIPSNAP3B	92.6017	-1.08952	0.264455	-4.11987	3.79079e-05	0.000835159
NKAIN2	20.7879	-1.56486	0.453005	-3.45439	0.000551529	0.00648525
NKAPP1	26.8749	-1.09558	0.238803	-4.58778	4.47988e-06	0.000152884
NLRP14	1.94744	-1.38888	0.474033	-2.92992	0.00339053	0.0243434
NMNAT3	239.973	-1.03869	0.195975	-5.30013	1.15717e-07	7.87091e-06
NPAP1P7	10.7039	-4.23966	0.911222	-4.65272	3.27588e-06	0.00011763
NPC1L1	3.16882	-1.38808	0.451719	-3.07288	0.00212004	0.0172996
NPW	64.0916	-1.1521	0.338026	-3.40832	0.00065363	0.00736386
NR1H4	1.68434	-1.82693	0.498555	-3.66446	0.000247862	0.00359145
NR1I2	23.3262	-1.15111	0.286693	-4.01512	5.94151e-05	0.00118862
NR6A1	252.332	-1.32183	0.306346	-4.31483	1.59728e-05	0.000414928
NTRK2	389.643	-1.41742	0.432202	-3.27954	0.00103975	0.010263
NYX	5.52346	-1.11401	0.352212	-3.16291	0.00156199	0.0138787
OGDHL	968.281	-1.14079	0.269015	-4.24062	2.22902e-05	0.000542612
OR2C3	6.24109	-3.12121	0.627073	-4.97743	6.44348e-07	3.19346e-05
OR7E29P	1.63073	-1.36587	0.466658	-2.92691	0.00342346	0.0245025
OSBP2	795.286	-1.2631	0.319136	-3.95786	7.5623e-05	0.00143893
OSBPL10	921.095	-1.07289	0.202901	-5.28773	1.23842e-07	8.34677e-06
OSTN	2.94376	-2.4761	0.684841	-3.61559	0.000299663	0.00412556
OVCH1-AS1	2.38085	-2.05202	0.675739	-3.0367	0.00239183	0.0188769
OVOS2	140.495	-1.25488	0.397065	-3.16039	0.00157557	0.0139641
PACRG	32.0358	-1.48548	0.301124	-4.93311	8.09297e-07	3.77094e-05
PAK3	128.848	-1.25769	0.423385	-2.97057	0.0029725	0.0221382
PCDH20	28.4604	-2.97733	0.655677	-4.54085	5.60276e-06	0.000182571
PCDHA11	18.2868	-1.99254	0.569107	-3.50118	0.000463201	0.00569005
PCDHA12	7.85469	-2.1375	0.571451	-3.74048	0.000183669	0.00284672
PCDHA13	14.9697	-1.89524	0.658108	-2.87983	0.00397894	0.0273325
PCDHA4	10.3383	-1.57938	0.60679	-2.60284	0.00924546	0.0498571
PCDHAC1	13.2139	-1.4476	0.505301	-2.86482	0.00417246	0.028311
PCDHAC2	30.5951	-1.49463	0.459032	-3.25604	0.00112977	0.0108956
PCDHB17P	3.6831	-1.9206	0.639744	-3.00213	0.00268095	0.0204691
PCDHB2	49.3651	-1.24017	0.475238	-2.60957	0.00906564	0.0492444
PCDHB3	25.2946	-1.2457	0.444746	-2.80092	0.00509564	0.0327192
PCDHB4	27.5777	-1.09539	0.343241	-3.19131	0.00141631	0.0128822
PCDHB6	43.5298	-1.15251	0.437266	-2.63572	0.00839589	0.0466424
PCDHB7	51.3878	-1.37464	0.384953	-3.57092	0.000355727	0.00466107
PCDHB9	36.0522	-1.35582	0.360615	-3.75975	0.000170081	0.00268679
PCDHGA5	42.8888	-1.13473	0.345241	-3.28679	0.00101336	0.0100953
PDE3A	1553.46	-1.24421	0.392711	-3.16826	0.00153355	0.013696
PDGFD	316.008	-1.5487	0.313516	-4.93978	7.82115e-07	3.66739e-05
PDGFRA	62.6448	-1.06757	0.388124	-2.75058	0.00594899	0.0366324
PDZD3	1.93716	-1.00088	0.3313	-3.02109	0.00251871	0.0196011
PEG10	1241.23	-1.19898	0.336325	-3.56494	0.000363942	0.00474166
PERM1	280.408	-1.32069	0.412301	-3.20321	0.00135904	0.0125113
PIFO	71.8385	-1.14166	0.273379	-4.17611	2.96533e-05	0.000684385
PLEKHA6	154.682	-1.10898	0.306221	-3.62148	0.000292918	0.00406323
PLEKHG4	616.31	-1.36066	0.240892	-5.64842	1.61929e-08	1.48333e-06
PLIN2	1361.69	-1.11151	0.229641	-4.84021	1.297e-06	5.51374e-05
PLIN4	132.574	-2.3765	0.346655	-6.85552	7.10546e-12	2.00225e-09
PLS1	30.4545	-1.01892	0.313714	-3.24793	0.00116246	0.0111167
PLSCR4	223.091	-1.09143	0.234883	-4.64669	3.37297e-06	0.000120823
PON3	71.8186	-1.75199	0.526277	-3.32903	0.000871487	0.00909042
POSTN	606.393	-1.48918	0.429895	-3.46404	0.000532119	0.00629521
POU3F1	809.046	-1.31942	0.331941	-3.97488	7.04146e-05	0.00135552
PPARG	616.181	-1.58468	0.363284	-4.36211	1.28817e-05	0.000350961
PPARGC1A	83.5848	-1.37117	0.480838	-2.85162	0.0043497	0.0291636
PPP1R13L	254.411	-1.02952	0.236475	-4.35362	1.3391e-05	0.000361839
PPP1R1B	16.9415	-1.40822	0.422157	-3.33576	0.000850661	0.00894115
PPP1R3C	2194.63	-1.35116	0.264613	-5.10616	3.2877e-07	1.84936e-05
PRICKLE2	449.945	-1.04712	0.230339	-4.54598	5.46814e-06	0.000178775
PRR5-ARHGAP8	1.42712	-1.15895	0.385808	-3.00395	0.002665	0.0204121
PRSS42	1.13326	-1.26211	0.446243	-2.82829	0.00467977	0.0307427
PRSS8	17.844	-1.31638	0.467329	-2.81682	0.00485014	0.031567
PRTN3	9.09154	-1.17614	0.415389	-2.83142	0.00463413	0.0305582
PSG5	23.4144	-2.22595	0.641552	-3.46964	0.000521161	0.00619881
PSG9	17.4162	-2.53496	0.762518	-3.32446	0.000885892	0.00920034
PSMA8	1.80408	-1.41382	0.487397	-2.90075	0.00372273	0.0260891
PTPN20	11.153	-1.62917	0.620073	-2.62738	0.00860454	0.0475072
PTPRK	749.916	-1.64909	0.326717	-5.04746	4.47733e-07	2.36141e-05
PYY	44.498	-1.63025	0.356135	-4.57761	4.7032e-06	0.000158675
R3HDML	1.59336	-1.64538	0.56172	-2.92918	0.00339852	0.024383
RAPGEF3	959.994	-1.38718	0.350206	-3.96105	7.46213e-05	0.00142449
RARRES2P1	5.71642	-1.58031	0.467982	-3.37686	0.000733179	0.00799901
RBKS	275.239	-1.02367	0.187587	-5.45702	4.84189e-08	3.70186e-06
RBPJL	1.87596	-1.45889	0.555313	-2.62715	0.00861027	0.0475123
RLN2	7.14922	-1.49298	0.405555	-3.68132	0.00023203	0.00341897
RN7SL693P	0.738487	-1.67418	0.495823	-3.37657	0.000733956	0.00800378
RNA5SP101	3.34827	-1.07387	0.383292	-2.80169	0.00508362	0.0326842
RNA5SP515	0.728941	-1.3344	0.490841	-2.7186	0.00655587	0.0392107
RNASE3	2.31106	-1.14857	0.393636	-2.91785	0.0035245	0.0250499
RNF112	13.3694	-1.30049	0.290337	-4.47923	7.49135e-06	0.000230552
RNF208	345.398	-1.21303	0.309439	-3.92009	8.85169e-05	0.0016217
RNF43	546.116	-1.34646	0.34462	-3.90708	9.34169e-05	0.00169364
RNF5P1	105.996	-1.12963	0.328443	-3.43936	0.000583097	0.00676841
ROBO1	997.385	-1.53357	0.35007	-4.38077	1.1826e-05	0.000328861
RORC	289.558	-1.72845	0.63884	-2.70561	0.00681799	0.0403623
RP1-159A19.4	7.38357	-1.8808	0.39753	-4.73122	2.23172e-06	8.57561e-05
RP1-223B1.1	2.20631	-1.08315	0.376202	-2.87917	0.00398718	0.0273719
RP1-232L24.3	1.16907	-1.28626	0.411272	-3.12752	0.00176287	0.0151319
RP1-40E16.9	7.20502	-1.69681	0.39056	-4.34455	1.39562e-05	0.000373698
RP1-45I4.3	4.0315	-1.2053	0.312316	-3.85924	0.000113741	0.00196691
RP1-80N2.3	23.5655	-1.49758	0.30554	-4.90143	9.51409e-07	4.3105e-05
RP1-80N2.4	7.37189	-1.45418	0.362534	-4.01116	6.04205e-05	0.00120062
RP11-1029J19.4	1.14142	-1.24808	0.472189	-2.64318	0.00821319	0.0459033
RP11-103C16.2	2.4959	-1.98807	0.616919	-3.22258	0.00127043	0.0119142
RP11-104D3.2	4.27724	-1.07539	0.22704	-4.73655	2.17389e-06	8.40799e-05
RP11-106M7.1	2.06002	-1.8766	0.560434	-3.34848	0.00081256	0.00866089
RP11-10A14.5	45.8961	-1.2331	0.461259	-2.67334	0.00751009	0.0430303
RP11-114N19.3	10.2606	-1.01663	0.232061	-4.38086	1.18209e-05	0.000328861
RP11-115D19.1	15.4725	-1.48241	0.488428	-3.03506	0.0024049	0.0189447
RP11-124N2.1	15.634	-1.47677	0.292265	-5.05286	4.35242e-07	2.31202e-05
RP11-127L20.3	1.42724	-1.7113	0.530169	-3.22783	0.00124732	0.0117422
RP11-137N23.1	9.30134	-1.02187	0.309953	-3.29685	0.000977741	0.00986005
RP11-141M1.3	2.24896	-1.671	0.401673	-4.1601	3.18108e-05	0.000724571
RP11-150C16.1	1.66957	-1.28714	0.422411	-3.04712	0.00231045	0.0184213
RP11-153M7.3	10.0729	-1.88399	0.525665	-3.58402	0.000338349	0.00449129
RP11-154P18.2	2.45162	-1.01437	0.360126	-2.81671	0.00485189	0.031567
RP11-156K13.1	2.25774	-1.85182	0.503228	-3.67987	0.00023335	0.00342989
RP11-162D16.2	1.00618	-1.1282	0.421169	-2.67872	0.00739037	0.0426443
RP11-166D19.1	437.315	-2.06886	0.385425	-5.36773	7.97337e-08	5.69845e-06
RP11-170K4.2	1.92808	-1.5844	0.444017	-3.56832	0.000359272	0.00469529
RP11-175D17.3	2.94953	-1.39882	0.301551	-4.63875	3.50519e-06	0.000124954
RP11-175P13.3	2.35231	-1.298	0.412966	-3.14312	0.00167155	0.0146066
RP11-175P19.2	2.19776	-1.19893	0.349766	-3.4278	0.000608492	0.00699428
RP11-17E2.2	72.4857	-1.0957	0.420946	-2.60294	0.00924293	0.0498571
RP11-184M15.1	16.5985	-1.59284	0.449535	-3.54332	0.000395128	0.00506544
RP11-187C18.4	3.52059	-1.28478	0.346412	-3.70883	0.000208221	0.00313369
RP11-1H8.5	3.17522	-1.11018	0.376585	-2.94801	0.00319824	0.0233365
RP11-202K23.1	0.568957	-1.67275	0.642412	-2.60385	0.00921822	0.0498032
RP11-20I23.8	3.75333	-1.13356	0.38856	-2.91733	0.00353039	0.0250797
RP11-210M15.2	35.0768	-1.15229	0.36104	-3.19159	0.00141494	0.0128776
RP11-213H15.1	3.06404	-1.19396	0.342735	-3.48362	0.000494676	0.00598384
RP11-219E7.2	0.776785	-1.42795	0.487168	-2.93112	0.00337745	0.0242789
RP11-219E7.3	2.25094	-1.34535	0.391206	-3.43898	0.000583901	0.00677243
RP11-231N3.1	37.8438	-1.92102	0.440235	-4.36362	1.27929e-05	0.000349204
RP11-254I22.1	1.59642	-1.25131	0.38953	-3.21236	0.00131647	0.0122305
RP11-265O12.1	0.9876	-1.5941	0.514081	-3.10088	0.00192949	0.0161179
RP11-268G12.1	2.05364	-2.59206	0.874631	-2.9636	0.00304063	0.0224803
RP11-276H19.1	33.6194	-1.48579	0.353403	-4.20423	2.61969e-05	0.000620589
RP11-277P12.20	5.31233	-1.78048	0.432497	-4.11676	3.84241e-05	0.000843393
RP11-281O15.4	11.172	-1.22479	0.411729	-2.97476	0.00293222	0.0219198
RP11-286E11.1	73.6622	-1.16611	0.323866	-3.6006	0.000317479	0.00430026
RP11-289F5.1	1.95852	-1.75701	0.502772	-3.49463	0.000474712	0.00579924
RP11-290L1.3	1.56167	-1.5392	0.536232	-2.87041	0.00409941	0.027922
RP11-299J3.8	93.5736	-1.05328	0.2406	-4.37771	1.19934e-05	0.000332268
RP11-310E22.4	1.01523	-1.30452	0.457439	-2.8518	0.00434729	0.0291541
RP11-319G9.5	3.63736	-1.70426	0.385018	-4.42643	9.58065e-06	0.000277642
RP11-326C3.13	4.47192	-1.54555	0.398294	-3.88043	0.000104273	0.00183754
RP11-329B9.3	4.77464	-1.23539	0.301817	-4.09318	4.25494e-05	0.000916934
RP11-329B9.4	7.70236	-1.17565	0.22301	-5.27171	1.35157e-07	8.98656e-06
RP11-329B9.5	1.13598	-1.31941	0.43041	-3.06547	0.0021733	0.0176174
RP11-339B21.8	5.38555	-1.08115	0.361285	-2.99253	0.00276675	0.0209888
RP11-344B5.2	14.9562	-1.38286	0.383272	-3.60805	0.000308505	0.00422009
RP11-348F1.3	4.4927	-1.46852	0.438821	-3.34651	0.000818367	0.00870062
RP11-367G18.1	1.9584	-1.23473	0.344838	-3.58061	0.000342799	0.00453814
RP11-368L12.1	10.6728	-1.34385	0.31736	-4.23447	2.29091e-05	0.000555147
RP11-369C8.1	3.82636	-2.37012	0.861166	-2.75223	0.00591915	0.036531
RP11-369K16.1	10.8863	-1.23329	0.358398	-3.4411	0.000579353	0.00674681
RP11-371A19.2	17.4789	-1.29803	0.469507	-2.76466	0.00569813	0.0355354
RP11-379B8.1	5.38143	-2.69012	0.736658	-3.65179	0.000260421	0.00372598
RP11-379F4.9	2.40525	-1.10866	0.337472	-3.28519	0.00101914	0.0101427
RP11-37L2.1	2.33607	-1.07175	0.331022	-3.23771	0.00120494	0.0114525
RP11-387H17.4	6.06971	-1.23667	0.339087	-3.64705	0.000265268	0.00377889
RP11-396O20.2	31.193	-1.62866	0.45046	-3.61554	0.000299717	0.00412556
RP11-398E10.1	16.4426	-2.24899	0.618025	-3.639	0.000273696	0.00387842
RP11-402G3.6	1.78933	-1.68034	0.558613	-3.00806	0.00262919	0.0202395
RP11-403I13.5	5.04467	-1.81045	0.615075	-2.94346	0.00324563	0.0235343
RP11-40E6.1	1.74887	-1.43913	0.379103	-3.79615	0.000146963	0.00239975
RP11-410D17.2	1.12039	-1.4392	0.359149	-4.00724	6.14316e-05	0.00121581
RP11-418H16.1	4.4692	-1.14816	0.348661	-3.29305	0.000991068	0.00995718
RP11-419C23.1	4.94573	-1.52903	0.492633	-3.10379	0.0019106	0.0160189
RP11-424M21.1	1.37539	-1.70101	0.561514	-3.02934	0.00245091	0.019215
RP11-430H10.1	20.336	-1.01258	0.337343	-3.00163	0.00268538	0.0204939
RP11-433J20.1	8.3051	-1.4609	0.329291	-4.43648	9.144e-06	0.000268672
RP11-435O5.2	17.8533	-1.06311	0.329582	-3.22564	0.0012569	0.01181
RP11-438B23.2	14.8655	-1.67038	0.404168	-4.13289	3.58226e-05	0.000794183
RP11-445N20.2	2.87525	-1.49896	0.478193	-3.13463	0.00172073	0.0148946
RP11-446H18.1	1.9514	-1.19489	0.422377	-2.82897	0.0046698	0.0307249
RP11-446H18.5	2.31189	-1.06251	0.403384	-2.63399	0.00843885	0.0468284
RP11-446H18.6	0.695185	-1.85281	0.557227	-3.32506	0.000884006	0.00918397
RP11-44M6.3	3.50185	-1.2012	0.359317	-3.34301	0.000828745	0.00876999
RP11-455O6.2	10.576	-1.42577	0.425435	-3.35133	0.000804241	0.00859058
RP11-466F5.10	1.59179	-1.25035	0.461887	-2.70705	0.00678846	0.0402444
RP11-466F5.6	6.89593	-1.36233	0.402533	-3.3844	0.00071335	0.00783176
RP11-475O6.1	20.7329	-1.2686	0.395237	-3.20971	0.00132868	0.0122968
RP11-485G7.5	5.30379	-1.11994	0.374591	-2.98977	0.00279186	0.0211159
RP11-496B10.3	1.81438	-1.62477	0.450151	-3.60939	0.00030692	0.00420424
RP11-496N12.6	4.10588	-2.12476	0.689506	-3.08158	0.00205907	0.0169468
RP11-532F6.5	1.84378	-1.2868	0.34408	-3.73984	0.000184137	0.00285155
RP11-536I6.2	12.9649	-2.1951	0.650895	-3.37243	0.000745078	0.0080939
RP11-53I6.3	3.18941	-1.1772	0.254477	-4.62596	3.72869e-06	0.000131835
RP11-545A16.3	2.36302	-1.30152	0.436617	-2.98092	0.00287388	0.0215983
RP11-551L14.4	4.49459	-1.15679	0.293751	-3.938	8.21619e-05	0.00153764
RP11-554A11.7	7.32577	-1.37794	0.392866	-3.5074	0.000452503	0.00558499
RP11-554D15.1	1.51673	-2.20418	0.723343	-3.04721	0.00230973	0.0184213
RP11-555M1.3	1.12418	-1.35628	0.418117	-3.24378	0.00117953	0.0112581
RP11-572O6.1	2.9804	-1.07646	0.277127	-3.88434	0.000102608	0.00181904
RP11-586D19.1	8.52308	-1.21183	0.369631	-3.27849	0.00104363	0.0102861
RP11-598F7.4	11.9399	-1.33343	0.498252	-2.67622	0.00744584	0.0428357
RP11-599J14.2	998.761	-1.32735	0.445632	-2.97858	0.00289589	0.021736
RP11-5P4.1	7.49509	-1.35256	0.47214	-2.86474	0.00417353	0.028311
RP11-619J20.1	1.06331	-1.2593	0.444302	-2.83433	0.00459217	0.0303424
RP11-620J15.4	9.83759	-1.36031	0.416855	-3.26328	0.00110132	0.0106927
RP11-65B23.5	11.7751	-2.87181	0.530666	-5.4117	6.24289e-08	4.65276e-06
RP11-666A20.3	24.0037	-1.30003	0.48087	-2.7035	0.00686145	0.0405061
RP11-673E1.3	12.1396	-1.22922	0.457602	-2.68622	0.00722651	0.0419992
RP11-677M14.2	1.93031	-1.35197	0.508792	-2.65721	0.00787914	0.0444816
RP11-680F8.1	24.6607	-1.08182	0.231989	-4.66324	3.11265e-06	0.000112864
RP11-708J19.3	0.854346	-1.46855	0.527003	-2.7866	0.0053264	0.0338846
RP11-726G1.1	682.41	-1.18361	0.389251	-3.04074	0.00236	0.0186955
RP11-731J8.2	20.8296	-1.71751	0.569113	-3.01787	0.00254555	0.0197298
RP11-74C1.4	0.717115	-1.27313	0.470275	-2.7072	0.00678528	0.0402411
RP11-74E22.4	6.58116	-2.30528	0.478978	-4.8129	1.48755e-06	6.13859e-05
RP11-74E22.8	74.6437	-1.28092	0.390512	-3.28011	0.00103766	0.0102546
RP11-756G20.1	6.72902	-1.52965	0.390076	-3.92141	8.80309e-05	0.00161881
RP11-762L8.6	6.54309	-1.2142	0.430899	-2.81783	0.0048349	0.031503
RP11-767C1.1	1.62419	-1.38246	0.457504	-3.02175	0.00251316	0.0195734
RP11-770J1.4	2.22759	-1.89766	0.454294	-4.17715	2.95184e-05	0.000682191
RP11-77K12.5	10.0683	-1.00381	0.257574	-3.89716	9.73273e-05	0.00175156
RP11-77P16.4	47.7929	-1.25624	0.32936	-3.81419	0.000136633	0.00227501
RP11-803B1.3	2.78064	-1.26434	0.427044	-2.96069	0.00306949	0.022654
RP11-806O11.1	9.19693	-2.20915	0.481744	-4.58574	4.52372e-06	0.000154203
RP11-857B24.1	1.74166	-1.43325	0.446168	-3.21236	0.00131647	0.0122305
RP11-857B24.5	12.562	-2.16999	0.422996	-5.13006	2.89651e-07	1.68043e-05
RP11-875O11.2	4.27731	-1.05804	0.285955	-3.70002	0.000215582	0.0032248
RP11-888D10.3	3.78335	-1.08748	0.294007	-3.69883	0.000216597	0.00323507
RP11-89K10.1	2.06933	-1.18042	0.376805	-3.13272	0.00173195	0.0149698
RP11-903H12.5	1.77569	-1.91456	0.417989	-4.58041	4.64067e-06	0.000156939
RP11-905K4.1	1.2228	-1.02593	0.378567	-2.71004	0.00672754	0.0400002
RP11-92G12.3	5.9716	-1.22271	0.34746	-3.519	0.000433169	0.005417
RP11-958N24.2	44.1934	-1.42506	0.474561	-3.00291	0.00267416	0.0204691
RP11-96H17.1	12.3028	-1.24216	0.379568	-3.27255	0.00106582	0.0104492
RP11-98D18.9	5.40439	-1.24143	0.33045	-3.7568	0.0001721	0.00271145
RP13-43E11.1	1.1068	-1.49558	0.462087	-3.23657	0.00120976	0.0114795
RP13-735L24.1	471.881	-1.10903	0.416398	-2.66339	0.00773567	0.0439526
RP3-332B22.1	3.94536	-1.39245	0.526139	-2.64654	0.00813192	0.0455545
RP3-395M20.7	27.3401	-1.23952	0.363661	-3.40845	0.000653337	0.00736386
RP3-527G5.1	16.4831	-2.02513	0.430928	-4.69947	2.6084e-06	9.73232e-05
RP4-545C24.1	18.1608	-1.06207	0.24692	-4.30127	1.6982e-05	0.000436546
RP4-604G5.1	3.25759	-1.16844	0.37576	-3.10954	0.0018738	0.0158045
RP4-655J12.4	30.7092	-1.10276	0.388761	-2.8366	0.00455966	0.0301754
RP4-758J18.7	13.3724	-1.67131	0.344424	-4.85249	1.21919e-06	5.2356e-05
RP5-1024G6.5	42.1964	-1.11116	0.234123	-4.74604	2.07438e-06	8.10789e-05
RP5-1096D14.6	1.59817	-1.41132	0.357774	-3.94472	7.98937e-05	0.00150184
RP5-1139I1.1	1.78364	-2.17645	0.614716	-3.54058	0.000399256	0.00509848
RP5-836J3.1	1.50874	-1.93153	0.732202	-2.63797	0.0083404	0.0464301
RP5-875H18.10	2.76069	-1.47286	0.448042	-3.28732	0.00101146	0.0100833
RP5-875H18.4	1.32332	-1.76483	0.450067	-3.92126	8.80873e-05	0.00161883
RP5-884G6.2	16.7162	-1.31478	0.292311	-4.49789	6.86301e-06	0.000214201
RP6-24A23.6	1.34247	-1.55729	0.584848	-2.66272	0.00775114	0.0440109
RP6-65G23.3	18.6012	-1.35119	0.259777	-5.20134	1.97855e-07	1.23248e-05
RPL10L	2.30441	-1.02162	0.334053	-3.05824	0.00222639	0.0179641
RPL29P25	1.23664	-1.4625	0.407033	-3.59308	0.000326796	0.00438117
RPL7AP28	6.75769	-3.82121	1.10148	-3.46917	0.000522074	0.00620616
RPL7AP73	0.842425	-1.19205	0.41369	-2.88152	0.00395767	0.0272647
RPS23P1	2.62121	-1.0039	0.307994	-3.25948	0.00111616	0.0107854
RPS23P5	11.9969	-1.65203	0.476071	-3.47013	0.000520203	0.00619138
RPSAP19	83.4616	-1.22	0.313913	-3.88641	0.000101736	0.00181058
SAMD12	61.2974	-2.07902	0.382414	-5.43657	5.43152e-08	4.09969e-06
SCARA5	72.0469	-1.73579	0.417948	-4.15312	3.27968e-05	0.000741323
SCGB1B2P	59.3582	-1.26503	0.374088	-3.38163	0.00072057	0.00789638
SCGB2B2	17.5392	-1.1626	0.303279	-3.83343	0.000126367	0.00213046
SCGB3A1	27.5439	-1.08262	0.313245	-3.45613	0.000547985	0.00644939
SCN8A	92.7362	-1.27101	0.325254	-3.90773	9.31682e-05	0.00169017
SCRN1	1201.39	-2.05585	0.334679	-6.14277	8.10971e-10	1.16481e-07
SCT	14.7885	-1.36155	0.377958	-3.60238	0.000315321	0.00428112
SDR42E1	76.0079	-1.6825	0.452623	-3.71721	0.000201435	0.00305331
SEC14L6	49.053	-1.21457	0.430756	-2.81963	0.00480783	0.0313783
SEL1L2	2.91166	-1.19595	0.457158	-2.61604	0.0088956	0.0486422
SELV	1.90702	-1.36545	0.517302	-2.63956	0.00830128	0.0462558
SERPINB9	2003.53	-1.36164	0.286895	-4.74614	2.07331e-06	8.10789e-05
SGCZ	5.16452	-2.4798	0.779526	-3.18116	0.00146686	0.0132281
SHC4	477.15	-1.60952	0.375486	-4.28649	1.81519e-05	0.000457868
SHE	333.513	-1.14323	0.283474	-4.03294	5.50823e-05	0.00111935
SLC19A3	155.885	-1.24645	0.336713	-3.70183	0.000214051	0.00320676
SLC22A9	4.09338	-1.25571	0.373643	-3.36072	0.000777387	0.00836412
SLC25A21-AS1	61.2441	-1.37401	0.373926	-3.67455	0.00023827	0.00348489
SLC34A3	11.9232	-1.08	0.313099	-3.4494	0.000561836	0.0065706
SLC3A1	90.7553	-2.17984	0.487746	-4.46922	7.85047e-06	0.000240206
SLC44A3	1799.71	-1.39319	0.284465	-4.89757	9.70267e-07	4.35634e-05
SLC5A5	10.9548	-2.00304	0.433169	-4.62415	3.76133e-06	0.000132646
SLC6A13	36.5594	-1.92879	0.566104	-3.40713	0.000656497	0.0073773
SMIM10L2A	508.13	-1.27218	0.270211	-4.70809	2.50046e-06	9.41267e-05
SMOC1	140.256	-1.39696	0.326502	-4.27857	1.88095e-05	0.000470444
SP7	3.14627	-1.29885	0.367899	-3.53046	0.000414841	0.00525892
SPAG6	11.4428	-1.59212	0.44948	-3.54213	0.000396917	0.00507766
SPAG8	48.8814	-1.04609	0.201114	-5.20149	1.97698e-07	1.23248e-05
SPDYC	6.76932	-3.32013	0.841455	-3.9457	7.95659e-05	0.00149663
SPEF1	23.6304	-1.4151	0.341222	-4.14715	3.36645e-05	0.000756315
SSTR4	3.20069	-2.16674	0.552609	-3.92092	8.8213e-05	0.00161883
STAR	47.4443	-1.25237	0.322305	-3.88568	0.000102043	0.00181301
STEAP1B	48.1383	-1.11429	0.355926	-3.13067	0.00174411	0.0150144
STX17-AS1	29.0591	-1.26171	0.244402	-5.16243	2.43769e-07	1.46005e-05
STXBP5L	39.2137	-1.95879	0.461262	-4.24659	2.17051e-05	0.000529877
SV2B	390.47	-1.53816	0.471538	-3.262	0.00110629	0.0107235
SYN2	197.516	-1.05269	0.260849	-4.03563	5.44571e-05	0.00111199
SYNGR3	62.7258	-1.11577	0.32989	-3.38224	0.00071897	0.00789054
SYNPR	1899.16	-1.36129	0.511184	-2.66301	0.00774456	0.0439904
SYNPR-AS1	0.93625	-2.39588	0.803366	-2.98231	0.00286086	0.0215442
SYT8	0.987796	-1.752	0.664217	-2.63769	0.00834729	0.0464509
TCAM1P	2.59944	-1.52653	0.440391	-3.4663	0.000527679	0.0062552
TCP11	4.19872	-1.42858	0.454088	-3.14604	0.00165497	0.0145088
TDRD10	75.0876	-1.14168	0.314026	-3.63561	0.00027732	0.00391476
TDRD5	28.7279	-2.73266	0.534757	-5.1101	3.21994e-07	1.82163e-05
TECTB	10.2255	-1.6003	0.38593	-4.14662	3.37423e-05	0.000757487
TENM3	274.165	-2.70721	0.40221	-6.73084	1.68686e-11	3.83929e-09
TFPI	202.351	-1.23524	0.324708	-3.80415	0.00014229	0.00234632
TGFBR3L	16.3227	-1.17472	0.392161	-2.9955	0.00273999	0.0208457
TH	13.5136	-1.27639	0.347744	-3.6705	0.00024208	0.00353189
TIMP3	248.923	-1.08488	0.28687	-3.7818	0.000155698	0.00250778
TIPARP	560.839	-1.15482	0.21812	-5.29441	1.19401e-07	8.08427e-06
TMC1	2.58763	-1.53365	0.506804	-3.02612	0.00247711	0.0193589
TMEM139	39.5079	-1.17087	0.31343	-3.73566	0.00018722	0.00288364
TMEM215	81.6606	-1.43885	0.316808	-4.54171	5.57992e-06	0.000182027
TMEM221	45.1698	-1.07017	0.307132	-3.48439	0.000493266	0.00597339
TMEM25	339.118	-1.15905	0.248973	-4.65532	3.23476e-06	0.000116436
TMEM40	30.0182	-2.4837	0.523943	-4.74041	2.13288e-06	8.28235e-05
TMEM47	186.741	-1.01832	0.307903	-3.30727	0.000942088	0.00962518
TMEM61	1.79651	-2.06681	0.626393	-3.29954	0.000968433	0.00980629
TMIGD2	7.86186	-1.29897	0.419379	-3.09737	0.00195244	0.0162729
TPTE2P3	33.5013	-1.99086	0.43442	-4.58281	4.58768e-06	0.000155844
TRIM54	58.8544	-1.20977	0.356956	-3.38914	0.00070112	0.00774346
TSGA10IP	65.6541	-1.89099	0.65664	-2.8798	0.00397923	0.0273325
TSPAN19	3.61003	-1.95207	0.492915	-3.96026	7.4868e-05	0.00142732
TSPAN7	475.317	-1.51167	0.39612	-3.81619	0.000135529	0.00225945
TSPAN8	35.9595	-2.96883	0.607884	-4.88388	1.04021e-06	4.58684e-05
U82695.9	16.2246	-1.06922	0.363325	-2.94286	0.00325191	0.0235654
UBXN7-AS1	1.47629	-1.47701	0.403459	-3.66087	0.000251363	0.00362973
UG0898H09	43.0492	-1.2598	0.460146	-2.73783	0.00618453	0.0375977
UNC5CL	44.7339	-1.38302	0.311871	-4.4346	9.22422e-06	0.000270116
UPB1	22.1588	-1.04469	0.296539	-3.52293	0.000426809	0.00536987
UROC1	6.11252	-1.43541	0.470172	-3.05295	0.002266	0.0181803
VIT	4.4019	-1.47193	0.510922	-2.88094	0.00396496	0.0272953
VN1R20P	1.71743	-1.21897	0.461453	-2.64158	0.00825201	0.0460593
VN1R85P	2.37071	-1.87341	0.56187	-3.33423	0.000855345	0.008984
VWA5A	856.586	-1.31198	0.265166	-4.94778	7.50631e-07	3.54787e-05
VWA8-AS1	2.59166	-1.12516	0.29839	-3.77076	0.000162749	0.00259731
WDR86	123.678	-1.02242	0.365058	-2.80071	0.00509901	0.0327265
WDR87	8.27933	-1.69906	0.553305	-3.07075	0.00213519	0.0173752
WNK4	554.122	-1.04004	0.323118	-3.21878	0.00128738	0.0120236
XXYLT1-AS1	1.46826	-1.66382	0.578825	-2.87447	0.00404702	0.0276927
XXyac-YM21GA2.1	2.90481	-2.28786	0.852808	-2.68274	0.0073022	0.0423597
XXyac-YM21GA2.4	6.95734	-2.07681	0.790566	-2.62699	0.00861447	0.0475266
YJEFN3	581.185	-2.57926	0.434067	-5.94209	2.81417e-09	3.31736e-07
ZBTB16	228.567	-1.02114	0.295456	-3.45616	0.000547938	0.00644939
ZC3H12B	24.5061	-1.47661	0.346428	-4.26237	2.02267e-05	0.00050123
ZDHHC15	75.1893	-1.36838	0.365004	-3.74896	0.000177571	0.00277841
ZNF204P	66.643	-1.64722	0.471221	-3.49564	0.000472933	0.00578229
ZNF350-AS1	44.4121	-1.56336	0.504794	-3.09703	0.00195472	0.0162827
ZNF385C	41.2904	-1.04111	0.257431	-4.04422	5.24976e-05	0.00107868
ZNF415	189.262	-1.29219	0.358834	-3.60108	0.000316896	0.00429538
ZNF454	38.8868	-1.13707	0.382181	-2.9752	0.00292794	0.0219044
ZNF521	191.158	-1.01206	0.345312	-2.93086	0.00338022	0.024287
ZNF667	173.726	-1.32755	0.421028	-3.15311	0.0016154	0.0142464
ZNF667-AS1	629.137	-1.21248	0.408164	-2.97057	0.00297243	0.0221382
ZNF702P	56.2387	-1.16925	0.349473	-3.34574	0.000820626	0.00871212
ZNF793-AS1	60.0331	-1.21661	0.308478	-3.94391	8.01648e-05	0.00150598
ZNF826P	34.0146	-1.17639	0.379838	-3.09709	0.00195429	0.0162827
ZNF835	149.368	-1.14871	0.413473	-2.7782	0.00546604	0.0345206
ZNF860	22.3747	-1.03693	0.268396	-3.86342	0.000111811	0.00193919
ZPLD1	19.7184	-1.99078	0.457603	-4.35045	1.35855e-05	0.000366092
ZSCAN1	20.9819	-1.19084	0.446705	-2.66583	0.00767992	0.0436819
ZYG11AP1	8.77784	-1.86225	0.458202	-4.06427	4.81831e-05	0.00100815
