# Supplementary material
Source: publisher figshare collection journal article supplement (https://tandf.figshare.com/articles/dataset/_/12429401)

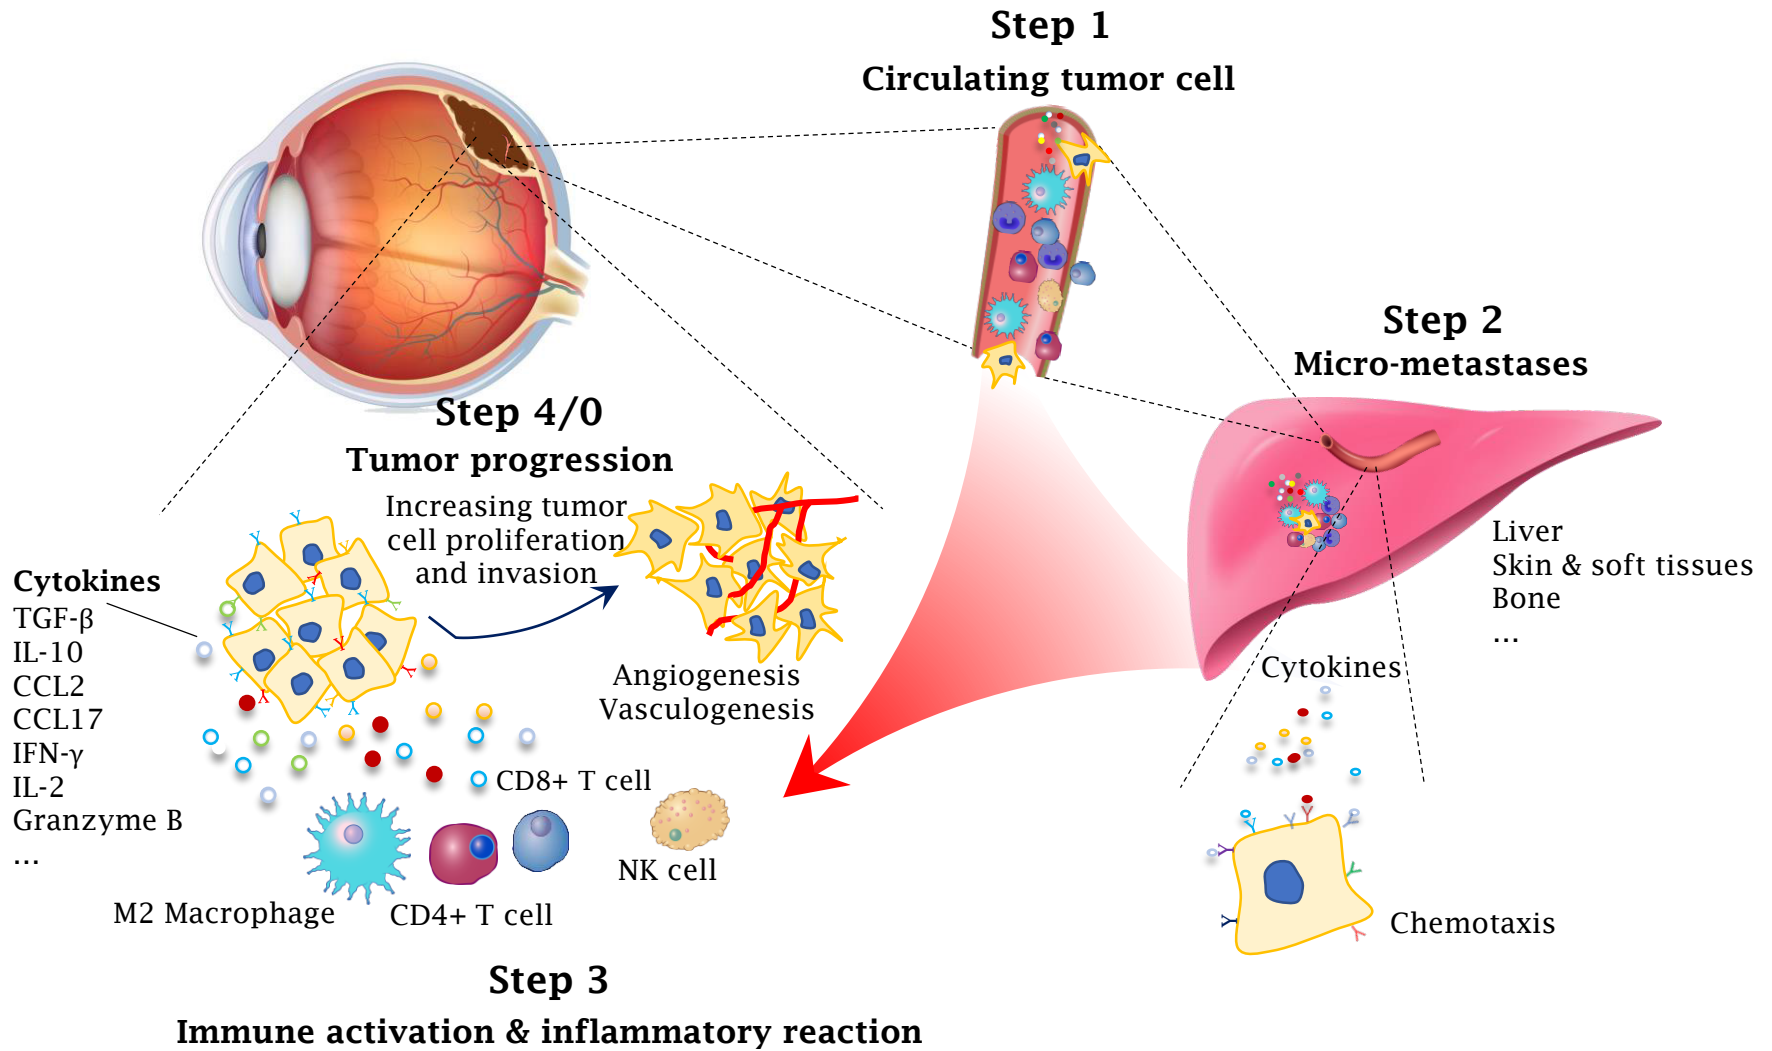

Supplement: Supplementary file 1 [file 1 › ianb_a_1773480_sm4135.pdf]

A

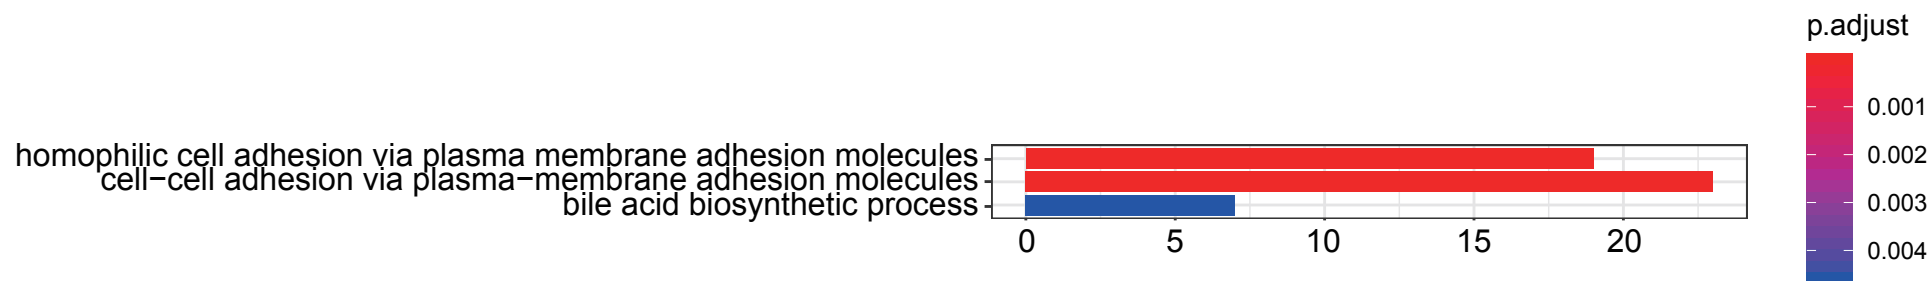

B

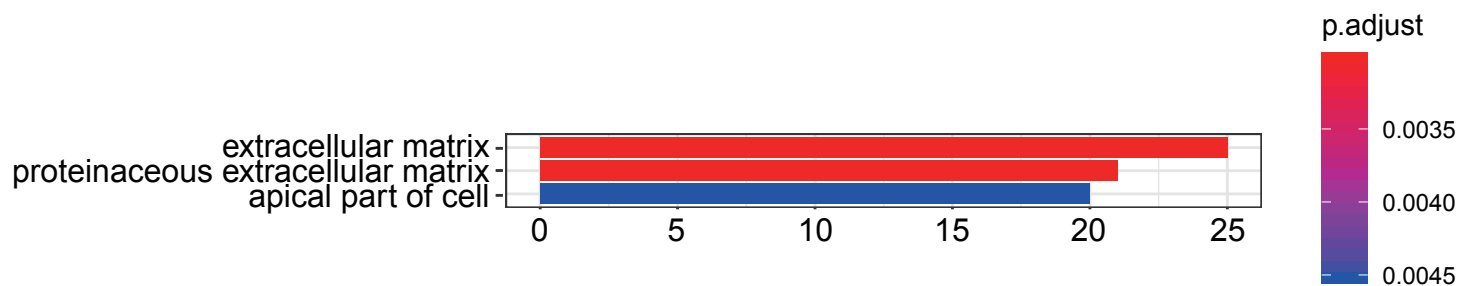

C

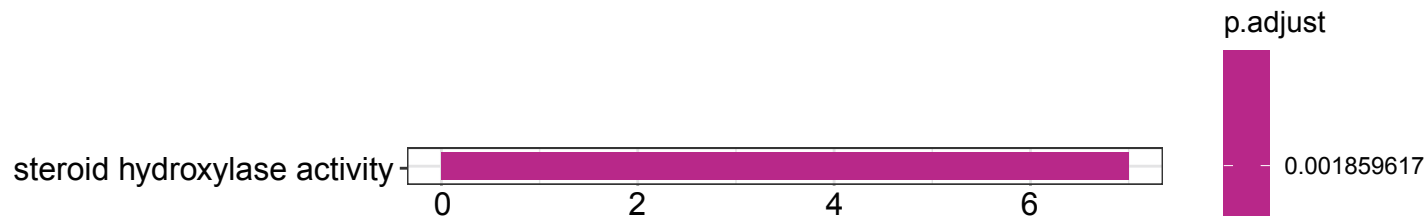

D

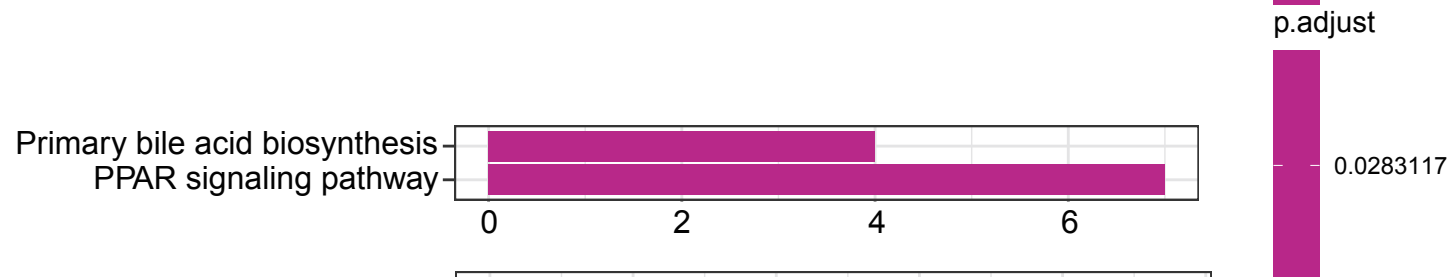

E

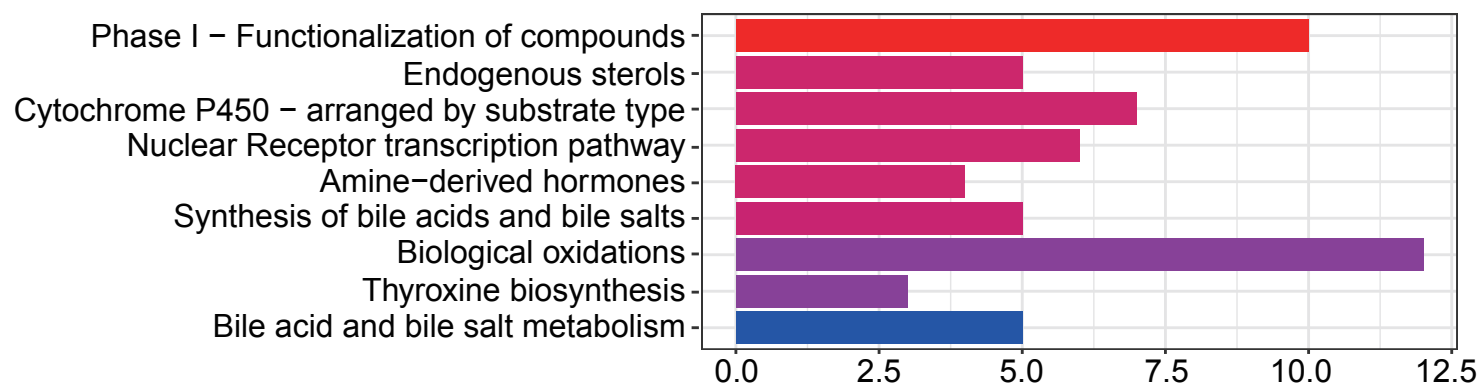

Supplement: Supplementary file 1 [file 1 › ianb_a_1773480_sm4134.pdf]

**A**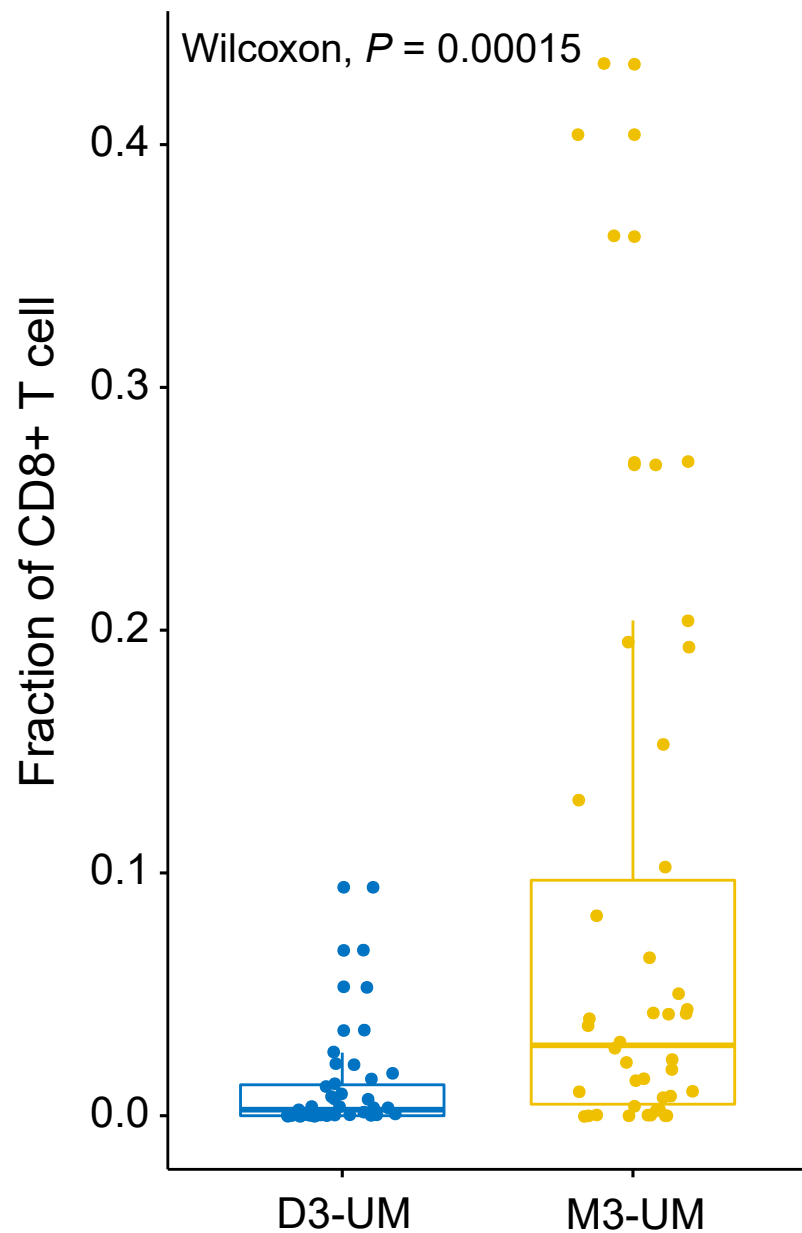**B**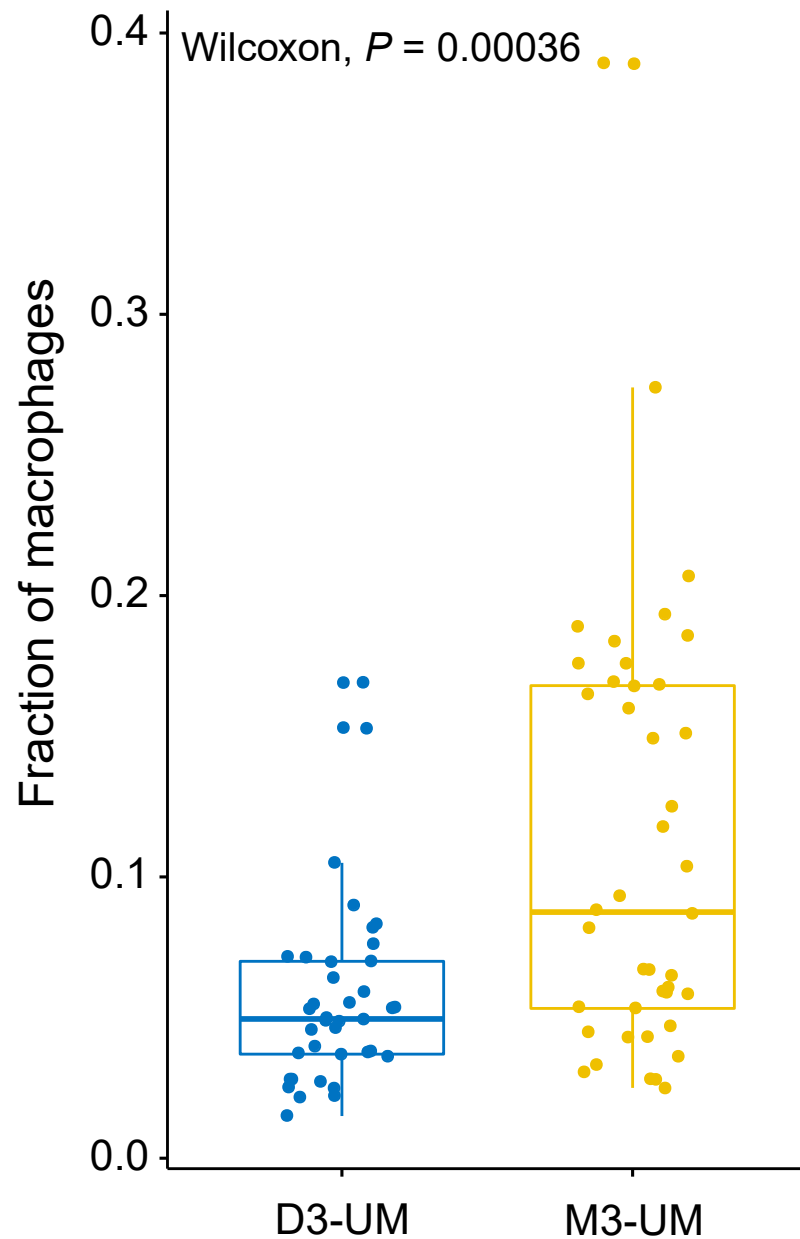

Supplement: Supplementary file 1 [file 1 › ianb_a_1773480_sm4133.pdf]
